# Supplementary material for: KIF18A's neck linker permits navigation of microtubule-bound obstacles within the mitotic spindle
Source: Life Sci Alliance. 2019 Jan 17;2(1):e201800169. doi: 10.26508/lsa.201800169 (PMC6337737; doi:10.26508/lsa.201800169)
Supplement: Supplementary file 1 [file LSA-2018-00169_SdataF1.xlsx]

## Sheet: GFP-WT KIF18A (CENTRAL)
	*CENTRAL LINE SCANS
	*Raw fluorescent intensities for each channel have been normalized to their heighest value, and aligned to peak kinetochore (ACA) intensity
	* Averages and standard deviations of each data set are found at the end of each experimental alignment
	Line scan 1				2				3				4				5				6				7				8				9				10				11				12				13
Distance from peak ACA intensity (μm)	GFP	ACA	α-tubulin		GFP	ACA	α-tubulin		GFP	ACA	α-tubulin		GFP	ACA	α-tubulin		GFP	ACA	α-tubulin		GFP	ACA	α-tubulin		GFP	ACA	α-tubulin		GFP	ACA	α-tubulin		GFP	ACA	α-tubulin		GFP	ACA	α-tubulin		GFP	ACA	α-tubulin		GFP	ACA	α-tubulin		GFP
-1.664
-1.6
-1.536
-1.472
-1.408
-1.344																																					1	0.483884	1
-1.28																					0.831785	0.670025	0.985086														0.962594	0.497811	0.970016										0.972681
-1.216																					0.831785	0.670025	0.985086														0.941147	0.524473	0.960791										1
-1.152	0.985532	0.56983	1																		0.837653	0.707305	0.986577														0.970075	0.543573	0.910708										0.986976
-1.088	0.985532	0.56983	1																		0.849389	0.722922	1						0.924217	0.430353	1						0.926185	0.552328	0.920593										0.933926
-1.024	0.942708	0.570725	0.962986		0.824121	0.442531	0.968872						0.938596	0.707829	1		1	0.589119	1		0.866993	0.766247	0.989933						0.953871	0.449064	0.965901						0.939651	0.549144	0.893575										0.947903
-0.96	0.852431	0.581021	0.975324		0.801228	0.441601	0.959422						0.938596	0.707829	1		0.997851	0.606171	0.965347		0.848411	0.756675	0.998509						0.916529	0.449757	0.95476						0.929177	0.587346	0.908072										0.937421
-0.896	0.852431	0.581021	0.975324		0.819654	0.44067	0.922735						0.902159	0.687791	0.985564		0.969909	0.561104	0.94967		0.84401	0.781864	0.956003						0.978583	0.480249	0.918298						0.901746	0.60008	0.89687										0.961563
-0.832	0.841435	0.590421	0.959284		0.843104	0.44765	0.960534		0.9477	0.51499	1		0.925776	0.650047	0.938976		0.974745	0.577345	0.954208		0.922249	0.765743	0.963833		0.919008	0.632696	0.97966		0.944536	0.488219	0.908508						0.934165	0.616395	0.883361		0.90023	0.465812	0.982873						0.955845
-0.768	0.885995	0.63966	0.985811		0.821329	0.44765	1		0.977316	0.521561	0.967798		0.933873	0.637465	0.96916		0.968297	0.606577	0.931931		0.879707	0.732494	0.962342		0.919008	0.664119	0.970527		0.959912	0.507277	0.887576						0.900249	0.654198	0.859967		0.95165	0.487179	0.939779		0.864697	0.522465	1		0.943139
-0.704	0.885995	0.63966	0.985811		0.847571	0.422987	0.95831		1	0.526078	0.926394		0.959514	0.628611	0.938976		0.976894	0.624442	0.886964		0.866993	0.706801	0.967934		0.902479	0.671762	0.955583		0.947282	0.542273	0.911884		0.864416	0.627598	0.985552		0.900249	0.654198	0.859967		0.907137	0.506903	0.939227		0.853033	0.521272	0.962077		0.924714
-0.64	0.894676	0.645479	0.947563		0.796762	0.464867	0.941078		0.940139	0.541684	0.912018		0.876518	0.616496	0.918635		0.954863	0.676005	0.942657		0.88313	0.682116	0.928784		0.910744	0.704034	1		0.96156	0.557866	0.866644		0.831212	0.62926	0.970588		0.885786	0.65778	0.836244		0.865695	0.542078	0.949724		0.868585	0.542346	0.97958		0.91169
-0.576	0.956019	0.631603	0.924738		0.762702	0.483015	0.958866		0.913674	0.574949	0.911443		0.91498	0.627213	0.896982		0.970446	0.633374	0.880363		0.915403	0.688161	0.920955		0.882094	0.705308	0.980905		0.951126	0.53569	0.896016		0.864416	0.618869	0.949432		0.850374	0.662555	0.835914		0.837299	0.552597	0.989503		0.900467	0.52326	0.970245		0.897078
-0.512	0.945602	0.637869	0.903763		0.856505	0.470917	0.952196		0.930057	0.573717	0.902818		0.908232	0.643989	0.902887		0.988178	0.655704	0.878713		0.905623	0.684131	0.950783		0.917355	0.732909	0.951847		0.972543	0.560638	0.833221		0.862203	0.636741	1		0.901247	0.641066	0.835585		0.898695	0.58284	1		0.891913	0.545129	0.970245		0.969504
-0.448	0.945602	0.637869	0.903763		0.786711	0.479758	0.956087		0.906112	0.583573	0.847039		0.917004	0.6589	0.909449		0.940355	0.640682	0.883663		0.948655	0.677078	0.916107		0.918457	0.746497	0.928601		0.992312	0.565489	0.86867		0.863863	0.654198	0.990196		0.866334	0.681655	0.820099		0.888718	0.595989	0.98453		0.931571	0.549503	0.990082		0.915502
-0.384	0.978009	0.715309	0.910549		0.835288	0.483946	0.917176		0.889099	0.603696	0.876941		0.948718	0.671016	0.832021		0.991402	0.689403	0.916254		0.967237	0.67204	0.92692		0.948209	0.746072	0.949772		1	0.601871	0.84605		0.877698	0.71197	0.941692		0.892768	0.737366	0.785502		0.898695	0.627219	0.98011		0.958009	0.601988	0.991249		0.946633
-0.32	1	0.796329	0.864281		0.912898	0.533271	0.907171		0.921865	0.656674	0.851639		0.950067	0.760019	0.861549		0.984417	0.751929	0.882838		0.957946	0.708312	0.928412		0.917906	0.744798	0.951432		0.996156	0.590437	0.886563		0.892086	0.756858	0.96646		0.921197	0.780342	0.791763		0.890253	0.633794	0.972376		1	0.586083	0.986581		0.934879
-0.256	1	0.796329	0.864281		1	0.572359	0.905503		0.901071	0.657906	0.816561		0.985155	0.832246	0.875328		0.968297	0.869265	0.865099		1	0.744081	0.910515		0.980716	0.780042	0.929846		0.953322	0.659044	0.799797		0.890426	0.728595	0.94066		0.895262	0.879029	0.760461		0.932464	0.665023	0.938122		0.942457	0.61829	0.966744		0.941233
-0.192	0.934028	0.901522	0.835904		0.945282	0.659842	0.932185		0.941399	0.736756	0.816561		0.992578	0.923579	0.815617		0.975819	0.946407	0.825495		0.981418	0.815113	0.925802		0.997245	0.826327	0.919469		0.918726	0.70894	0.810601		0.932485	0.787614	0.918989		0.941646	0.910864	0.761779		1	0.820184	0.913812		0.939347	0.680318	0.995333		0.95108
-0.128	0.85706	0.974933	0.818014		0.964266	0.84551	0.867704		0.930687	0.820123	0.772283		0.977058	0.93616	0.822178		0.975819	0.946407	0.825495		0.965281	0.928463	0.928784		1	0.887049	0.947281		0.943987	0.838531	0.799797		1	0.816293	0.965944		0.929177	0.918424	0.764415		1	0.820184	0.913812		0.901244	0.789662	0.934072		0.980623
-0.064	0.85706	0.974933	0.818014		0.934115	0.906933	0.894942		0.89603	0.901027	0.777458		1	0.972507	0.831365		0.932832	0.994722	0.840347		0.943765	0.979345	0.901193		0.960882	0.993206	0.950187		0.927512	0.897782	0.758271		0.944106	0.862012	0.887513		0.872319	0.933943	0.766063		0.904835	0.924721	0.949171		0.876361	0.922863	0.988915		0.957433
0	0.769097	1	0.796422		0.846454	1	0.870484		0.827347	1	0.73433		0.931174	1	0.809055		0.882321	1	0.817244		0.865526	1	0.914989		0.895317	1	0.896638		0.968699	1	0.753207		0.882125	1	0.898349		0.835411	1	0.733443		0.880276	1	0.902762		0.881804	1	0.963827		0.963151
0.064	0.766204	0.879141	0.74892		0.818537	0.946487	0.839355		0.846881	0.979466	0.765957		0.91498	0.942684	0.791995		0.8259	0.942753	0.839934		0.778484	0.938539	0.884415		0.878788	0.950743	0.90577		0.940692	0.985447	0.736664		0.799115	0.987116	0.907121		0.813466	0.904497	0.705107		0.887951	0.973702	0.918232		0.888802	0.977734	0.956826		0.922808
0.128	0.743056	0.791406	0.740284		0.803462	0.848302	0.82657		0.805293	0.912526	0.723404		0.88529	0.871389	0.827428		0.840408	0.914738	0.796205		0.778973	0.877078	0.879567		0.873829	0.887049	0.898298		0.916529	0.900208	0.715057		0.816823	0.959268	0.907637		0.773067	0.83844	0.714662		0.884881	0.893162	0.889503		0.871695	0.935586	0.987165		0.880559
0.192	0.743056	0.791406	0.740284		0.811279	0.725454	0.790439		0.763705	0.835318	0.720529		0.833333	0.778192	0.777559		0.797958	0.825416	0.830446		0.802445	0.772796	0.862416		0.814876	0.769851	0.875052		0.861065	0.802495	0.713369		0.79192	0.891106	0.910217		0.721197	0.787505	0.718287		0.832694	0.87574	0.892265		0.87325	0.858449	0.974912		0.859593
0.256	0.758681	0.742167	0.727329		0.820212	0.676128	0.800445		0.759294	0.73347	0.708453		0.807692	0.751631	0.754593		0.786136	0.772635	0.830858		0.792176	0.75869	0.864653		0.807713	0.738004	0.917393		0.836354	0.726611	0.691087		0.79026	0.793017	0.874613		0.729177	0.764027	0.691269		0.85188	0.800789	0.892265		0.813375	0.755865	0.962077		0.849746
0.32	0.715278	0.764548	0.667489		0.810162	0.635644	0.740411		0.73598	0.682546	0.721679		0.763833	0.710158	0.784121		0.813541	0.761673	0.828383		0.800978	0.702771	0.818046		0.835813	0.665393	0.903279		0.847886	0.659044	0.671506		0.813503	0.726517	0.894737		0.703242	0.692002	0.680395		0.85495	0.771532	0.877901		0.852255	0.760239	0.903151		0.859593
0.384	0.715278	0.764548	0.667489		0.761027	0.65007	0.757087		0.766856	0.674333	0.675101		0.735493	0.706897	0.80643		0.769479	0.716606	0.841997		0.800978	0.664484	0.855705		0.823691	0.665817	0.870486		0.794069	0.648995	0.666779		0.799668	0.691604	0.906089		0.684289	0.682849	0.6514		0.818112	0.772847	0.848619		0.87014	0.720477	0.949825		0.846887
0.448	0.719907	0.777081	0.737816		0.783361	0.697534	0.712618		0.73724	0.647639	0.684876		0.767206	0.693383	0.777559		0.811929	0.687779	0.828795		0.806357	0.661965	0.874348		0.767493	0.667941	0.881279		0.796266	0.658004	0.680959		0.785279	0.714464	0.890609		0.681297	0.662953	0.654695		0.795088	0.711045	0.860221		0.835148	0.750298	0.883897		0.863405
0.512	0.68287	0.782453	0.699568		0.731993	0.686831	0.695942		0.708885	0.573306	0.673951		0.765857	0.680801	0.777559		0.785599	0.686155	0.813119		0.81467	0.662469	0.874348		0.813774	0.694268	0.88543		0.778144	0.645877	0.665091		0.778085	0.687032	0.900413		0.680299	0.626343	0.676442						0.860031	0.732803	0.912485		0.822745
0.576					0.740369	0.661703	0.716509		0.722117	0.598357	0.694077		0.77058	0.685927	0.808399		0.793122	0.699553	0.855198		0.815159	0.650378	0.858688						0.768259	0.623354	0.651249		0.773658	0.656276	0.952012										0.828927	0.738767	0.894982		0.853558
0.64					0.705751	0.681247	0.678155		0.733459	0.565092	0.668775						0.799033	0.660577	0.827145										0.803405	0.607415	0.654288
0.704					0.717476	0.678455	0.712618		0.722117	0.588912	0.656699
0.768
0.832
0.896
[truncated: 89 more columns]

## Sheet: GFP-sNL1 KIF18A (CENTRAL)
	Line scan 1				2				3				4				5				6				7				8				9				10				11				12				13
Distance from peak ACA intensity (μm)	GFP	ACA	α-tubulin		GFP	ACA	α-tubulin		GFP	ACA	α-tubulin		GFP	ACA	α-tubulin		GFP	ACA	α-tubulin		GFP	ACA	α-tubulin		GFP	ACA	α-tubulin		GFP	ACA	α-tubulin		GFP	ACA	α-tubulin		GFP	ACA	α-tubulin		GFP	ACA	α-tubulin		GFP	ACA	α-tubulin		GFP
-1.792
-1.728
-1.664
-1.6
-1.536																																					0.983395	0.578271	0.966793
-1.472																																					0.949262	0.553738	1
-1.408																																					0.938192	0.575935	0.9752
-1.344																																					0.964945	0.563084	0.944094
-1.28																																					0.936347	0.564252	0.964271		0.971179	0.823706	0.988838
-1.216																																					0.903137	0.594626	0.940311		1	0.824456	0.986528
-1.152					0.914605	0.665453	1																		0.989071	0.678277	0.966515										0.919742	0.571262	0.907524		0.894323	0.817704	0.947652						0.970136
-1.088					0.963288	0.664412	0.993307														0.953345	0.63449	0.983787		0.969035	0.69221	0.965948										0.993542	0.579439	0.913829		0.908297	0.817704	0.946882						0.970136
-1.024					0.955307	0.658169	0.950363														0.941021	0.650759	0.974708		0.934426	0.709943	0.95403										0.924354	0.60514	0.886927		0.938865	0.843961	0.949577						0.938462
-0.96					0.931365	0.681582	0.939208														0.909331	0.643167	1		0.939891	0.678911	1										0.911439	0.626168	0.91425		0.972052	0.826707	0.91224		0.979478	0.583683	0.973956		0.935747
-0.896					0.952913	0.673777	0.937535						0.891525	0.838963	0.983231						0.948944	0.632321	0.976654		0.92623	0.69031	0.976731		0.933792	0.721212	1						0.948339	0.615654	0.875578		0.958952	0.897974	0.925712		0.925373	0.572286	0.989681		0.961086
-0.832	0.94942	0.698032	0.978754		0.952913	0.673777	0.937535						0.930847	0.813028	1						0.933099	0.66974	0.984436		0.92623	0.69031	0.976731		0.978504	0.730909	0.988506						1	0.625	0.899958		0.942358	0.827457	0.907236		0.951493	0.592082	1		0.961086
-0.768	0.92869	0.702952	0.975921		0.980048	0.669095	0.91188		0.985251	0.745075	1		0.938983	0.81544	0.963667		0.831802	0.614949	0.960959		0.950704	0.687636	0.994163		0.979053	0.710576	0.942111		0.920894	0.747273	0.961283		0.85291	0.594891	0.964849		0.941882	0.622079	0.885666		0.904803	0.828957	0.944958		0.973881	0.594481	0.973956		0.952036
-0.704	0.91874	0.709102	0.967422		0.977654	0.677419	0.894032		1	0.764776	0.968407		0.945085	0.765983	0.9346		0.835336	0.656285	1		0.956866	0.67462	0.974708		0.948087	0.69031	0.971056		0.949269	0.743636	0.934059		0.869841	0.565693	0.952681		0.919742	0.619159	0.868852		0.89869	0.814704	0.925712		0.93097	0.603479	0.999017		0.955656
-0.64	0.963516	0.701722	1		0.968077	0.688345	0.889571		0.963864	0.763582	0.976144		1	0.811218	0.966462		0.830389	0.629105	0.921233		0.955106	0.67679	0.955253		0.913479	0.708043	0.966515		0.961307	0.719394	0.955838		0.888889	0.604015	0.943668		0.909594	0.60514	0.941572		0.945852	0.789197	0.915319		0.971082	0.628674	0.957248		0.946606
-0.576	0.965174	0.742312	0.948536		0.916999	0.66129	0.897379		0.968289	0.762985	0.955513		0.903729	0.77503	0.980995		0.825442	0.629672	0.928082		0.922535	0.696312	0.999351		0.962659	0.738442	0.906924		0.936371	0.774545	0.932244		0.89418	0.59854	0.958089		0.935424	0.632593	0.869273		0.922271	0.809452	0.924172		0.988806	0.622675	0.981818		1
-0.512	0.936982	0.712792	0.968366		0.916999	0.66129	0.897379		0.95649	0.804179	0.970342		0.947119	0.765983	0.955282		0.821908	0.646659	0.930822		0.9375	0.746746	0.971466		0.925319	0.738442	0.96084		0.88994	0.758182	0.927405		0.920635	0.591697	0.914826		0.926199	0.619743	0.907104		0.923144	0.811703	0.93572		0.963619	0.611878	0.913514		1
-0.448	0.968491	0.718942	0.956563		0.982442	0.657648	0.865588		0.973451	0.74806	0.921986		0.890169	0.799759	0.958077		0.84523	0.656285	0.929452		0.916373	0.747289	0.972763		1	0.732742	0.900114		0.935512	0.801818	0.938294		0.93545	0.578923	0.943668		0.944649	0.626168	0.886087		0.884716	0.773443	0.953811		0.909515	0.691062	0.909091		0.956561
-0.384	0.961028	0.749077	0.954674		0.971269	0.672216	0.887897		0.94469	0.773134	0.950999		0.891525	0.787093	0.96199		0.832509	0.65402	0.923288		0.992958	0.788503	0.949416		0.999089	0.751742	0.943246		0.935512	0.801818	0.938294		0.898413	0.589872	1		0.957565	0.627336	0.866751		0.899563	0.750188	0.907236		0.989739	0.70126	0.928747		0.965611
-0.32	0.975954	0.795203	0.906516		1	0.725286	0.856665		0.938053	0.740299	0.93617		0.884746	0.81544	0.91839		0.871378	0.662514	0.915068		0.934859	0.864425	0.959792		0.981785	0.848638	0.931328		0.955288	0.794545	0.931034		0.978836	0.600821	0.985128		0.956642	0.67465	0.907945		0.903057	0.785446	0.910701		0.930037	0.716257	0.908108		0.962896
-0.256	0.989221	0.809963	0.926818		0.961692	0.716441	0.926938		0.939528	0.767761	0.971631		0.869153	0.849819	0.956959		0.877739	0.722537	0.880822		0.934859	0.864425	0.959792		0.960838	0.870804	0.92622		0.94583	0.817576	0.931034		0.928042	0.646898	0.93826		0.907749	0.783879	0.891551		0.854148	0.784696	0.909161		0.974813	0.80204	0.929238		0.986425
-0.192	0.94942	0.914514	0.917847		0.940942	0.690427	0.91913		0.938053	0.817313	0.940039		0.865085	0.898673	0.937954		0.923675	0.852208	0.867808		0.961268	0.922451	0.99546		0.917122	0.932869	0.8916		0.928633	0.823636	0.868724		1	0.724453	0.943218		0.940959	0.817173	0.885246		0.886463	0.803451	0.949962		1	0.842831	0.918919		0.986425
-0.128	0.94942	0.914514	0.917847		0.981644	0.788762	0.881205		0.94764	0.857313	0.915538		0.848136	0.9807	0.883734		0.925088	0.953567	0.932192		0.988556	0.932213	0.961738		0.918944	0.977201	0.902951		0.950129	0.84303	0.891107		0.965079	0.853558	0.907165		0.900369	0.881425	0.932325		0.864629	0.866467	0.971132		0.994403	0.920816	0.867813		0.942081
-0.064	0.974295	0.95326	0.92068		0.901038	0.890219	0.895706		0.94764	0.857313	0.915538		0.858983	0.977081	0.948016		0.925088	0.953567	0.932192		0.912852	0.988612	0.947471		0.969945	0.993667	0.903519		1	0.872727	0.869933		1	0.958942	0.900856		0.896679	0.925234	0.855401		0.827074	0.901725	0.958814		0.996269	0.9994	0.852088		0.940271
0	1	1	0.936261		0.969673	1	0.833798		0.917404	1	0.872985		0.834576	1	0.887647		1	1	0.882877		0.913732	1	0.97406		0.959016	1	0.897843		0.94411	1	0.882638		0.967196	1	0.916629		0.904059	1	0.852459		0.902183	1	0.942648		0.944963	1	0.844226		0.947511
0.064	0.966833	0.9754	0.914542		0.969673	1	0.833798		0.863569	0.988657	0.894262		0.812203	0.906514	0.883734		0.946996	0.984711	0.90411		0.897007	0.896421	0.997406		0.933515	0.895503	0.865494		0.941531	0.951515	0.888082		0.913228	0.964872	0.917981		0.940037	0.936916	0.882303		0.864629	0.982746	0.942263		0.910448	0.881224	0.861916		0.947511
0.128	0.935323	0.890529	0.848442		0.930567	0.998439	0.829336		0.865782	0.921194	0.898775		0.821017	0.813631	0.90777		0.898233	0.874858	0.855479		0.932218	0.814534	0.928016		0.933515	0.895503	0.865494		0.941531	0.951515	0.888082		0.924868	0.818887	0.902659		0.916974	0.820678	0.855401		0.871616	0.990998	0.923403		0.838619	0.820636	0.836855		0.942986
0.192	0.965174	0.838253	0.884325		0.957702	0.919355	0.872839		0.874631	0.855522	0.904578		0.799322	0.81544	0.863611		0.833216	0.744054	0.905479		0.946303	0.77603	0.971466		0.95173	0.903737	0.853008		0.927773	0.916364	0.819722		0.879365	0.731296	0.858495		0.921587	0.78271	0.876419		0.89345	0.897974	0.998075		0.836754	0.74985	0.834889		0.914027
0.256	0.965174	0.838253	0.884325		0.938547	0.828304	0.846626		0.879056	0.84597	0.894907		0.860339	0.818456	0.886529		0.845936	0.672707	0.893836		0.982394	0.765184	0.944877		0.894353	0.877137	0.860386		0.918315	0.924848	0.864489		0.875132	0.64781	0.875169		0.905904	0.728388	0.858764		0.870742	0.834209	0.963048		0.843284	0.659868	0.800491		0.942081
0.32	0.906302	0.773063	0.855524		0.895451	0.738293	0.829894		0.868732	0.814328	0.888459		0.884746	0.814234	0.869201		0.856537	0.681767	0.878767		0.985035	0.775488	0.940986		0.918033	0.839139	0.862656		0.918315	0.895152	0.843315		0.873016	0.581204	0.835511		0.890221	0.752336	0.839008		0.838428	0.805701	1		0.823694	0.653869	0.825061		0.924887
0.384	0.935323	0.817958	0.878187		0.895451	0.738293	0.829894		0.85472	0.800597	0.92392		0.871186	0.818456	0.877585		0.860777	0.686297	0.828767		1	0.79013	0.902724						0.895099	0.850909	0.839685		0.903704	0.606752	0.875169		0.917897	0.699182	0.85372		0.808734	0.745686	0.981139		0.863806	0.657469	0.779853		0.924887
0.448	0.929519	0.771218	0.846553		0.897845	0.710718	0.855549		0.890855	0.818507	0.920696						0.864311	0.630804	0.878767		0.941901	0.778742	0.885863						0.913156	0.856364	0.870538		0.861376	0.599909	0.858495		0.873616	0.695678	0.854561		0.850655	0.726182	0.996151		0.843284	0.656869	0.769533		0.936652
0.512	0.941128	0.794588	0.869688		0.873105	0.658169	0.831009		0.844395	0.82806	0.921341										0.918134	0.793384	0.880026						0.859845	0.815758	0.836661		0.883598	0.622263	0.864353		0.920664	0.721963	0.802438		0.854148	0.726932	0.991532		0.88806	0.667067	0.785258		0.937557
0.576					0.936153	0.683663	0.837144																										0.873016	0.616788	0.858044						0.849782	0.756939	0.977675		0.872201	0.703659	0.781327		0.935747
0.64																																									0.814847	0.707427	0.955735		0.851679	0.686263	0.756265
0.704
0.768
0.832
0.896
[truncated: 116 more columns]

## Sheet: GFP-sNL2 KIF18A (CENTRAL)
	Line scan 1				2				3				4				5				6				7				8				9				10				11				12				13
Distance from peak ACA intensity (μm)	GFP	ACA	α-tubulin		GFP	ACA	α-tubulin		GFP	ACA	α-tubulin		GFP	ACA	α-tubulin		GFP	ACA	α-tubulin		GFP	ACA	α-tubulin		GFP	ACA	α-tubulin		GFP	ACA	α-tubulin		GFP	ACA	α-tubulin		GFP	ACA	α-tubulin		GFP	ACA	α-tubulin		GFP	ACA	α-tubulin		GFP
-1.664																													0.877893	0.631848	0.931199
-1.6																													0.90423	0.600102	0.97139
-1.536																													0.88747	0.606247	0.98842
-1.472																													0.900239	0.59703	0.959809
-1.408																													0.889066	0.624168	0.982289
-1.344																													0.897047	0.628264	0.955041
-1.28																													0.888268	0.619048	0.98842
-1.216																													0.877095	0.622632	0.989782
-1.152																	0.864655	0.6711	1										0.911413	0.609831	0.936649
-1.088									0.9101	0.57492	1						0.865517	0.700726	0.969789										0.907422	0.629288	0.956403
-1.024									0.996298	0.572347	0.995588						0.858621	0.720073	0.977341		0.945128	0.638826	0.959437						0.924182	0.643113	0.991144
-0.96									0.979376	0.594212	0.994118		0.91405	0.623207	0.974466		0.841379	0.752116	0.952669		0.926206	0.662754	0.964507						0.965682	0.633385	0.961172
-0.896									1	0.610289	0.955882		0.917355	0.648631	0.998143		0.852586	0.733978	0.959215		0.939451	0.66456	0.903662						0.992817	0.630312	0.932561
-0.832					0.965387	0.578733	1		0.927552	0.590354	0.961029		0.973554	0.666884	0.950789		0.853448	0.755744	0.903827		0.990539	0.616704	0.99493		0.977396	0.566056	0.989204		0.975259	0.645161	0.946185						0.809098	0.402151	0.959044		0.906071	0.532979	0.99616
-0.768					0.965387	0.578733	1		0.942887	0.587781	0.955147		0.966942	0.642112	0.970288		0.822414	0.708585	0.891239		0.962157	0.67088	0.988169		0.980108	0.611379	0.973009		0.889864	0.64977	0.979564						0.817673	0.405376	0.993857		0.940053	0.524113	0.99008		0.886801	0.45887	1		0.921311
-0.704					0.939427	0.583382	0.966369		0.933897	0.650804	0.966912		0.870248	0.639505	0.941968		0.869828	0.73942	0.90433		0.961211	0.655079	0.96169		0.935805	0.624879	1		0.876297	0.658474	0.9203						0.816182	0.416846	0.974061		0.871707	0.530496	1		0.849637	0.48319	0.999057		0.934791
-0.64					0.881558	0.595003	0.945093		0.933897	0.650804	0.966912		0.875207	0.635593	0.980966		0.861207	0.756953	0.887714		0.924314	0.636569	0.950986		0.884268	0.618611	0.978408		0.889864	0.642089	0.955722		0.908485	0.425909	1		0.832215	0.453047	0.941638		0.926308	0.537234	0.97632		0.884238	0.478898	0.948476		0.95337
-0.576					0.936182	0.596165	0.908717		0.93707	0.623794	0.970588		0.935537	0.661017	0.941504		0.926724	0.73821	0.898792		1	0.649661	0.945352		0.900542	0.644166	0.992578		0.873105	0.646697	0.942779		0.98523	0.439658	0.975503		0.880686	0.45448	0.847782		0.903016	0.50922	0.9952		0.911576	0.476753	0.930883		0.959563
-0.512	0.950603	0.663823	0.932892		0.970254	0.635677	0.947838		0.977261	0.648232	0.972794		0.917355	0.67601	0.95961		0.853448	0.729141	0.875126		0.940397	0.638375	0.974648		0.906872	0.672613	0.999325		0.877095	0.666667	1		1	0.414604	0.996344		0.950037	0.472043	0.895563		0.910653	0.536879	0.9856		0.885946	0.478898	0.944706		1
-0.448	0.950603	0.663823	0.932892		1	0.646136	0.941661		0.962983	0.655949	0.967647		0.96281	0.706649	0.951253		0.891379	0.727932	0.929003		0.923368	0.684424	0.971831		0.946655	0.665381	0.982456		0.982442	0.673323	0.920981		0.876339	0.431408	0.985375		0.980239	0.480287	0.935154		0.948835	0.539716	0.94592		0.906877	0.483548	0.889413		0.960656
-0.384	0.956347	0.677474	0.997164		0.974581	0.644393	0.931366		0.934955	0.646302	0.982353		0.958678	0.695567	1		0.891379	0.727932	0.929003		0.956481	0.664108	0.964507		0.958409	0.626808	0.964238		1	0.644649	0.991144		0.791196	0.425603	0.974406		1	0.501434	0.959727		0.95609	0.539362	0.95872		0.907305	0.478898	0.913604		0.989071
-0.32	1	0.708191	0.981096		0.964846	0.658919	0.947838		0.925965	0.702894	0.974265		0.987603	0.6897	0.968431		0.933621	0.764813	0.931017		0.930937	0.694808	0.961127		1	0.655256	0.962213		0.938547	0.680492	0.979564		0.82479	0.410327	0.966728		0.881059	0.510394	1		0.932417	0.538652	0.96864		0.889791	0.500715	0.906063		0.93224
-0.256	0.980471	0.673493	0.982987		0.978908	0.701336	0.948524		0.927552	0.727331	0.936765		1	0.697523	0.981894		0.905172	0.820435	0.937563		0.935667	0.730926	1		0.977396	0.736258	0.960864		0.909018	0.737327	0.949591		0.838401	0.440574	0.958684		0.819538	0.520789	0.935154		0.947308	0.535816	0.96896		0.946604	0.501788	0.912347		0.966849
-0.192	0.984492	0.776451	0.97448		0.979448	0.793144	0.95127		0.926494	0.749839	0.924265		0.966116	0.765971	0.987465		0.924138	0.862152	0.896274		0.977294	0.859142	0.997183		0.981917	0.786885	0.952092		0.853152	0.793139	0.948229		0.80278	0.490987	0.916271		0.868755	0.590681	0.931058		1	0.568794	0.952		0.895344	0.524678	0.880616		0.904189
-0.128	0.950029	0.86917	1		0.925906	0.88437	0.946465		0.924379	0.866238	0.934559		0.949587	0.922425	0.945682		0.922414	0.951028	0.898792		0.94702	0.892099	0.967887		0.971067	0.845227	0.897436		0.874701	0.857655	0.869891		0.909933	0.61656	0.893967		0.865772	0.715054	0.886007		0.983963	0.655674	0.9056		0.983768	0.675966	0.868363		0.950091
-0.064	0.869041	0.929465	0.933837		0.946458	0.902382	0.924502		0.915389	0.974277	0.903676		0.931405	0.968709	0.964253		0.912069	0.973398	0.863041		0.952696	0.94763	0.95493		0.879747	0.89296	0.850202		0.892259	0.985663	0.936649		0.97104	0.882676	0.841682		0.875466	0.870968	0.81058		0.934708	0.910638	0.87008		1	0.874106	0.867421		0.938798
0	0.869615	1	0.986767		0.924824	1	0.901853		0.885246	1	0.946324		0.889256	1	0.948932		0.889655	1	0.861027		0.907285	1	0.903099		0.887884	1	0.866397		0.877893	1	0.920981		0.889082	1	0.846435		0.805369	1	0.808191		0.913326	1	0.79168		0.958565	1	0.829092		0.912933
0.064	0.88857	0.998862	0.912098		0.931855	0.981406	0.895676		0.86092	0.91254	0.905147		0.889256	1	0.948932		0.922414	0.940145	0.863041		0.977294	0.889391	0.889577		0.877034	0.962392	0.876518		0.880287	0.887865	0.918937		0.779322	0.974641	0.831444		0.798285	0.932258	0.780887		0.885834	0.820922	0.79616		0.912431	0.886624	0.778511		0.945719
0.128	0.834003	0.862344	0.89414		0.942672	0.866938	0.919698		0.854574	0.809646	0.815441		0.915702	0.950456	0.906221		0.922414	0.940145	0.863041		0.95175	0.856885	0.947606		0.896022	0.972999	0.790148		0.88348	0.821813	0.890327		0.691283	0.715246	0.817916		0.771439	0.764516	0.773379		0.876289	0.698227	0.7488		0.862025	0.659514	0.753063		0.866667
0.192	0.851235	0.779863	0.982042		0.918334	0.793144	0.891558		0.852988	0.732476	0.833824		0.866942	0.817471	0.940111		0.963793	0.870617	0.861027		0.967833	0.726862	0.876056		0.867993	0.899229	0.843455		0.92099	0.693292	0.905995		0.686939	0.579896	0.783912		0.785235	0.67491	0.786689		0.844597	0.610993	0.76288		0.862025	0.659514	0.753063		0.896539
0.256	0.866169	0.725256	0.943289		0.872904	0.739105	0.881263		0.852988	0.732476	0.833824		0.902479	0.749674	0.891829		0.971552	0.775091	0.82578		0.930937	0.676298	0.891831		0.910488	0.804243	0.850202		0.873903	0.641065	0.920981		0.661164	0.537733	0.789031		0.825876	0.645878	0.77372		0.854143	0.56844	0.70752		0.873558	0.54578	0.754006		0.894718
0.32	0.8139	0.673493	0.903592		0.896701	0.697269	0.844887		0.852988	0.73119	0.858824		0.860331	0.70013	0.852832		1	0.781741	0.856495		0.930937	0.676298	0.891831		0.942134	0.749759	0.839406		0.907422	0.636457	0.89782		0.662323	0.512985	0.749543		0.837062	0.645161	0.809898		0.832761	0.619504	0.69504		0.909868	0.529685	0.774427
0.384	0.83745	0.69397	0.898866		0.895619	0.683324	0.875772		0.795875	0.726045	0.827941		0.860331	0.70013	0.852832		0.943103	0.787183	0.862538		0.950804	0.6614	0.910423		0.938517	0.702025	0.834683		0.910615	0.599078	0.927112						0.867636	0.623656	0.81843
0.448	0.854107	0.679181	0.925331		0.866414	0.674608	0.791352		0.812269	0.768489	0.822794		0.87686	0.718383	0.831476		0.975	0.79081	0.839376		0.937559	0.624379	0.912676		0.91953	0.662488	0.802969		0.881883	0.620072	0.880109
0.512					0.810708	0.674608	0.8442		0.82972	0.805145	0.836029		0.843802	0.710561	0.857474		0.943966	0.747279	0.808661		0.937559	0.624379	0.912676		0.84358	0.652845	0.804993		0.888268	0.634409	0.884196
0.576					0.822607	0.687391	0.814001		0.795346	0.837942	0.863971		0.827273	0.737288	0.850046		0.950862	0.747279	0.840383		0.96878	0.567946	0.887887		0.816456	0.617647	0.842105
0.64																					0.971618	0.590068	0.917183		0.807414	0.605593	0.798246
0.704																									0.818264	0.583414	0.836707
0.768
0.832
0.896
[truncated: 122 more columns]

## Sheet: GFP-sNL3 KIF18A (CENTRAL)
	Line scan 1				2				3				4				5				6				7				8				9				10				11				12				13
Distance from peak ACA intensity (μm)	GFP	ACA	α-tubulin		GFP	ACA	α-tubulin		GFP	ACA	α-tubulin		GFP	ACA	α-tubulin		GFP	ACA	α-tubulin		GFP	ACA	α-tubulin		GFP	ACA	α-tubulin		GFP	ACA	α-tubulin		GFP	ACA	α-tubulin		GFP	ACA	α-tubulin		GFP	ACA	α-tubulin		GFP	ACA	α-tubulin		GFP
-2.24	0.828458	0.508895	0.980804
-2.176	0.782609	0.514825	0.934013
-2.112	0.853755	0.491644	0.956209
-2.048	0.844269	0.478706	0.89982
-1.984	0.812648	0.501348	0.964607
-1.92	0.792095	0.50027	0.959208
-1.856	0.859289	0.481402	0.955609
-1.792	0.817391	0.487332	0.956209
-1.728	0.8	0.492722	0.954409
-1.664	0.8	0.52938	0.95201																						0.908265	0.591157	0.985677														0.911151	0.432749	0.980191
-1.6	0.804743	0.47655	0.940612																						0.933697	0.570961	0.980035														0.941976	0.45071	0.997065
-1.536	0.822134	0.493801	0.967007																						0.932788	0.595524	0.97092														0.878513	0.433584	1
-1.472	0.820553	0.52938	0.985003																						0.946412	0.616812	1														0.926564	0.434837	0.961849						0.845228
-1.408	0.852174	0.528841	0.971206																						0.918256	0.625546	0.973524														0.902992	0.428989	0.981291						0.8908
-1.344	0.873518	0.506739	0.946611																		0.834826	0.620489	0.970005		0.960945	0.613537	0.962674		0.924779	0.428111	0.96121		0.963184	0.537545	1						0.905712	0.45071	0.980558						0.920894
-1.28	0.826087	0.510512	0.978404																		0.829787	0.620489	0.994678		0.873751	0.602074	0.958767		0.958407	0.429319	0.928528		0.922388	0.539928	0.956507						0.921124	0.484127	0.959648						0.900258
-1.216	0.859289	0.513208	0.978404																		0.898656	0.650757	0.945331		0.906449	0.587336	0.934028		1	0.416432	1		0.912438	0.537545	0.970784						0.922031	0.466165	0.951577						0.917455
-1.152	0.869565	0.523989	1		0.972594	0.714937	0.957125														0.846025	0.630966	0.939042		0.930972	0.574236	0.990885		0.946018	0.429319	0.963958		0.915423	0.541915	0.942563		0.826128	0.58115	0.994167		0.912058	0.483709	0.924798		0.924895	0.654997	1		0.963027
-1.088	0.852174	0.516442	0.959808		0.953209	0.732658	0.945776		0.872109	0.632362	0.971333		0.946121	0.542697	1						0.898096	0.647846	0.961297		0.893733	0.601528	0.976997		0.997345	0.441402	0.965486		0.899502	0.534764	0.954847		0.81203	0.589363	0.990668		0.915684	0.492063	0.91526		0.967932	0.66359	0.992041		0.941531
-1.024	0.867984	0.512668	0.94781		1	0.71038	0.948928		0.917687	0.622249	0.951333		0.946121	0.542697	1						0.93617	0.66298	1		0.918256	0.612445	0.949219		0.99115	0.465163	0.966097		0.946269	0.54708	0.984728		0.861842	0.590145	0.96967		0.925657	0.506683	0.895818		0.918143	0.679185	0.999532		0.953568
-0.96	0.855336	0.502426	0.95141		0.960561	0.72	0.897856		0.941497	0.648424	0.94		0.942241	0.574895	0.964213						0.919373	0.632712	0.894533		0.89555	0.616266	0.96658		0.966372	0.430125	0.946549		0.964179	0.549066	0.959163		0.835526	0.58858	0.994167		0.979148	0.497076	0.926266		0.924895	0.643857	0.99485		0.94583
-0.896	0.906719	0.501887	0.914217		0.986631	0.727089	0.915511		0.90068	0.654372	0.97		0.929741	0.558563	0.964213						0.899216	0.654249	0.945331		0.894641	0.578057	0.931424		0.979646	0.432944	0.935247		0.891542	0.548669	0.957171		0.886278	0.589363	0.927967		0.970082	0.507519	0.923331		0.907173	0.649268	0.943352		0.914875
-0.832	0.906719	0.501887	0.914217		0.981952	0.721013	0.93884		0.960544	0.619274	0.972667		0.913362	0.593094	0.93865						0.895857	0.638533	0.939526		0.887375	0.603166	0.923177		0.951327	0.445429	0.916921		0.891542	0.548669	0.957171		0.915414	0.687133	1		0.931097	0.537176	0.887748		0.942616	0.65436	0.963483		0.932072
-0.768	0.86166	0.51159	0.922615		0.955882	0.730633	0.960277		0.922449	0.641285	1		0.917241	0.595894	0.990798		0.865615	0.661449	0.968579		0.895857	0.650757	0.935656		0.932788	0.640284	0.927083		0.944248	0.437374	0.915394		0.939303	0.554629	0.959163		0.896617	0.682831	0.954506		0.945603	0.523392	0.903155		0.889451	0.643221	0.952715		0.940671
-0.704	0.8917	0.538005	0.937013		0.923128	0.72	0.981084		0.931973	0.673409	0.941333		0.931897	0.590294	0.946319		0.865615	0.661449	0.968579		0.912654	0.649593	0.927915		0.880109	0.644651	0.947049		0.931858	0.463149	0.89493		0.927363	0.590385	0.964143		0.880639	0.683223	0.934675		0.883046	0.535088	0.878577		0.905485	0.662954	0.97191		0.983663
-0.64	0.860079	0.549326	0.944211		0.931818	0.699241	0.955233		0.92585	0.627603	0.945333		0.931897	0.590294	0.946319		0.92109	0.657391	0.972569		0.931691	0.657159	0.958394		0.906449	0.66321	0.94184		0.973451	0.463149	0.870189		0.98408	0.593564	0.955511		0.879699	0.722331	0.948965		0.883953	0.556809	0.881145		0.931646	0.643857	0.986423		0.919175
-0.576	0.836364	0.560108	0.928614		0.917781	0.743797	0.972257		0.921088	0.651398	0.956		0.955603	0.60196	0.956033		0.939742	0.707246	0.954613		0.8729	0.666473	0.963232		0.934605	0.651747	0.919705		0.973451	0.463149	0.870189		0.997015	0.554231	0.925631		0.899436	0.685178	0.924468		0.895739	0.550125	0.869773		0.903797	0.65627	0.980805		0.94325
-0.512	0.875889	0.542857	0.891422		0.953209	0.738228	0.979193		0.957823	0.631767	0.974		0.950862	0.622958	0.943252		0.891918	0.684058	1		0.869541	0.678696	0.974359		1	0.672489	0.935764		0.969912	0.484092	0.871106		0.943284	0.601112	0.921315		0.903195	0.734846	0.87839		0.925657	0.6132	0.852531		0.940084	0.65818	0.964888		0.926913
-0.448	0.911462	0.573046	0.904619		0.987299	0.753418	1		0.935374	0.66508	0.938667		0.970259	0.668222	0.933027		0.916308	0.735652	0.9601		0.923852	0.67695	0.969521		0.915531	0.66048	0.921007		0.970796	0.504631	0.846976		0.949254	0.614223	0.898074		0.865602	0.742276	0.904929		0.902085	0.665414	0.870506		0.929958	0.638129	0.979401		0.950989
-0.384	0.913834	0.526685	0.875225		0.968583	0.70481	0.948928		0.938776	0.675193	0.928667		0.978448	0.704153	0.894683		0.977044	0.750725	0.944638		0.889138	0.688591	0.957426		0.955495	0.642467	0.927083		0.955752	0.542489	0.872327		0.933333	0.615415	0.883798		0.906015	0.719984	0.88014		0.921124	0.6934	0.842993		0.929958	0.638129	0.979401		0.971625
-0.32	0.886957	0.580054	0.880024		0.965909	0.736203	0.970996		0.926531	0.680547	0.967333		0.992672	0.724685	0.942229		0.947394	0.742029	0.958105		0.978163	0.712456	0.948234		0.949137	0.691048	0.926215		0.970796	0.570681	0.843922		1	0.62495	0.869522		0.893797	0.754791	0.892388		0.94651	0.732247	0.806676		0.914768	0.640993	0.953652		0.933792
-0.256	0.901186	0.615094	0.926815		0.981952	0.792405	0.977932		0.992517	0.710291	0.908667		1	0.720019	0.890593		0.972262	0.746667	0.920698		0.960246	0.714785	0.964683		0.965486	0.701419	0.90842		0.914159	0.572292	0.846671		0.925373	0.719507	0.87583		0.903195	0.760266	0.870808		0.925657	0.784461	0.82135		0.98903	0.74634	0.978933		0.932932
-0.192	0.917787	0.688949	0.872825		0.983289	0.847595	0.959647		0.993197	0.789411	0.898667		0.934483	0.767615	0.925358		0.935438	0.748406	0.92818		0.93561	0.812573	0.956942		0.976385	0.849891	0.922309		0.957522	0.685461	0.872022		0.929353	0.748113	0.865206		0.87782	0.810716	0.880432		0.933817	0.886383	0.837491		0.971308	0.782941	0.962079		0.99914
-0.128	0.943083	0.849596	0.886023		0.940508	0.885063	0.932535		0.978231	0.923855	0.954		0.972845	0.832011	0.881391		0.985175	0.868406	0.92419		0.962486	0.897555	0.952588		0.917348	0.885371	0.928385		0.976106	0.881192	0.83934		0.940299	0.918157	0.844622		0.867481	0.863903	0.853602		0.931097	0.98538	0.80631		1	0.829726	0.938202		0.973345
-0.064	0.974704	0.96442	0.880624		0.949866	0.971646	0.947667		0.987755	0.97442	0.96		0.990517	0.951937	0.904908		1	0.98029	0.905237		0.962486	0.897555	0.952588		0.941871	0.959061	0.885417		0.976106	0.881192	0.83934		0.958209	0.956297	0.829681		0.891917	0.975362	0.847186		0.901179	0.996658	0.815481		0.906329	0.907702	0.899813		1
0	0.98419	1	0.894421		0.949866	1	0.950189		0.979592	1	0.940667		0.931466	1	0.83998		0.947872	1	0.917207		0.947368	1	0.935172		0.930064	1	0.837674		0.933628	1	0.838729		0.916418	1	0.819389		0.902256	1	0.847769		0.936537	1	0.788701		0.956118	1	0.941011		0.957868
0.064	0.976285	0.971968	0.847031		0.921123	0.971646	0.965322		0.931973	0.943486	0.930667		0.941379	0.868875	0.875256		0.93209	0.988986	0.911721		0.960806	0.963912	0.918239		0.956403	0.921943	0.813802		0.909735	0.91905	0.828955		0.916418	1	0.819389		0.87688	0.991787	0.808399		0.976428	0.97619	0.734776		0.923207	0.973902	0.927434		0.954428
0.128	0.993676	0.885714	0.845231		0.93984	0.930127	0.956494		0.972109	0.95003	0.924667		0.910345	0.782548	0.877812		0.879962	0.952464	0.916209		0.942329	0.874854	0.895985		0.962761	0.824236	0.853733		0.928319	0.838502	0.837202		0.903483	0.944378	0.777556		0.912594	0.940946	0.856518		0.979148	0.820384	0.788701		0.933333	0.84182	0.933521		0.950989
0.192	0.943083	0.749326	0.842232		0.941176	0.869873	0.925599		0.966667	0.910767	0.886		0.936207	0.732151	0.852761		0.882353	0.96058	0.901247		0.947928	0.804424	0.905177		0.924614	0.771288	0.83941		0.911504	0.754329	0.796274		0.907463	0.874454	0.774568		0.906015	0.887368	0.820356		0.93019	0.752715	0.741379		0.933333	0.843094	0.89794		0.924334
0.256	1	0.762264	0.821836		0.93115	0.776203	0.923077		0.990476	0.863772	0.870667		0.916379	0.696687	0.851738		0.910569	0.790725	0.873815		0.94009	0.730501	0.910982		0.945504	0.695961	0.801649		0.975221	0.695932	0.80391		0.912438	0.876043	0.758964		0.962406	0.785686	0.832604		0.953762	0.791562	0.775862		0.875105	0.740929	0.942884		0.89166
0.32	0.986561	0.739084	0.832633		0.917112	0.772658	0.945145		1	0.876264	0.878		0.905172	0.685488	0.858896		0.923482	0.844058	0.862344		0.94009	0.730501	0.910982		0.922797	0.693777	0.790799		0.932743	0.681031	0.802688		0.867662	0.787843	0.764608		1	0.760657	0.819773		0.94651	0.751044	0.763756		0.896203	0.686187	0.948034		0.933792
0.384	1	0.776819	0.80204		0.945856	0.786329	0.943253		0.963946	0.865556	0.884667		0.886638	0.688754	0.892638		0.959828	0.776812	0.883791		0.973124	0.715367	0.923077		0.965486	0.687227	0.808594		0.947788	0.674184	0.777031		0.940299	0.804926	0.772244		0.93985	0.734454	0.80315		1	0.753551	0.742113		0.896203	0.686187	0.948034		0.949269
0.448	0.962055	0.780054	0.79904		0.897727	0.78481	0.936948		0.909524	0.82213	0.871333		0.903017	0.69342	0.840491		0.91296	0.772174	0.881796		0.983763	0.712456	0.884857		0.942779	0.688865	0.790799		0.972566	0.668546	0.774588		0.961194	0.760826	0.770584		0.921992	0.712554	0.797609		0.967362	0.744779	0.717902		0.925738	0.639402	0.939139		0.920034
0.512					0.91377	0.801519	0.947037		0.988435	0.831648	0.876		0.892672	0.674288	0.875256		0.9077	0.768116	0.846384		0.976484	0.702561	0.840348						0.923894	0.709223	0.773671						0.924812	0.730544	0.815398						0.907173	0.591343	0.971442		0.934652
0.576					0.947861	0.745823	0.948298										0.94022	0.77971	0.862843		0.994401	0.724098	0.837929						0.961062	0.689086	0.795052						0.883459	0.712163	0.826772
0.64					0.95254	0.733671	0.928121														1	0.694994	0.826802														0.897556	0.749316	0.792943
0.704
0.768
0.832
0.896
[truncated: 155 more columns]
