# Supplementary material for: KIF18A's neck linker permits navigation of microtubule-bound obstacles within the mitotic spindle
Source: Life Sci Alliance. 2019 Jan 17;2(1):e201800169. doi: 10.26508/lsa.201800169 (PMC6337737; doi:10.26508/lsa.201800169)
Supplement: Supplementary file 5 [file LSA-2018-00169_SdataF3.xlsx]

## Sheet: Tau Obstacle
	NO TAU						WITH TAU
	MEASURED RUN LENGTHS (μm)		MEASURED VELOCITY (μm/sec)				MEASURED RUN LENGTHS (μm)		MEASURED VELOCITY (μm/sec)
	GFP-KIF18A1-480 WT	GFP-KIF18A1-480 sNL1	GFP-KIF18A1-480 WT	GFP-KIF18A1-480 sNL1			GFP-KIF18A1-480 WT	GFP-KIF18A1-480 sNL1	GFP-KIF18A1-480 WT	GFP-KIF18A1-480 sNL1
	3.44	1.54667	0.364407	0.4844			4.134	0.53	0.607941	0.311765
	1.33334	0.533344	0.423732	0.0416568			3.59	0.42	0.467647	0.337273
	1.17333	1	0.385963	0.569231			2.226	0.3112	0.742	0.385455
	1.06667	0.906672	0.215055	0.424821			2.438	0.636	0.641579	0.424
	4.24	1.17333	0.341935	0.581582			5.088	0.848	0.195	0.446316
	1.24	0.8	0.194872	0.134472			0.848	0.848	0.106667	0.265
	2.24	1.6	0.3024	0.169159			1.272	0.466	0.578182	0.201034
	2.64	0.68	0.518968	0.0888454			1.166	0.508	0.583	0.489231
	2.61333	1.02	0.464799	0.589547			3.484	0.802	0.183333	0.193077
	4.96	1.26	0.421036	0.195462			0.954	0.212	0.298125	0.53
	1.52	1.86666	0.516109	0.0979994			2.272	0.314	0.53	0.915455
	2.24	1.01333	0.390739	0.149973			2.544	0.742	0.0472414	0.174545
	1.54667	1.68	0.465925	0.0664851			1.272	1.06	0.669474	0.883333
	2.02667	1.49333	0.449808	0.270912			1.166	1.59	0.53	0.567857
	1.84	3.76	0.427049	0.45161			1.06	1.708	0.392593	0.829565
	1.86667	2.13334	0.376018	0.500059			2.544	0.3116	0.417049	0.188889
	2.56	1.52	0.491359	0.927924			2.756	1.272	0.689	0.410323
	2.24	1.44	0.43423	0.0512			3.284	0.326	0.228308	0.454286
	1.97333	1.81333	0.489831	0.813469			1.59	1.06	0.53	0.407692
	3.44	1.01333	0.410667	0.322541			3.18	0.954	0.123636	0.414783
	1.76	2.88	0.402326	0.896051			2.12	0.53	0.54359	0.883333
	10.7467	3.52	0.391592	0.39124			2.862	0.424	0.485085	0.848
	2.48	0.96	0.380064	0.561164			5.802	0.442	0.327636	0.742
	1.48	2.8	0.366857	0.5002			0.954	0.36	0.151429	0.236
	4	1.28	0.579994	0.414844			2.544	0.548	0.120488	0.770909
	0.64	0.746672	0.044135	0.37647			0.49	1.06	0.407692	0.588889
	1.2	4.48	0.555965	0.643003			0.526	0.424	0.542927	0.424
	3.84	1.3	0.189836	0.669911			2.544	0.42	0.152308	0.494667
	0.853344	1.6	0.409842	0.416431			2.12	1.06	0.432653	0.1625
	1.06666	1.84	0.115997	0.5272			2.014	0.48	0.394902	0.142308
	2.13333	2.34666	0.33515	0.666992			2.484	0.636	0.315745	0.276522
	1.44	2.02667	0.359	0.802344			2.756	0.342	0.787429	0.174545
	4.61	1.2	0.337	0.54426			1.166	0.424	0.253478	0.605714
	0.969	2.18667	0.267	0.73237			1.272	0.53	0.276522	0.53
	1.761	0.916	0.1225	0.208			1.696	0.32	0.434872	0.848
	3.435	0.711	0.176	0.336			1.166	0.636	0.485833	0.578182
	2.228	0.558	0.256	0.254			2.544	0.636	0.578182	0.489231
	4.372	0.583	0.165	0.275			0.954	0.36	0.212	0.318
	1.886	0.747	0.165	0.607			1.378	0.36	0.353333	0.706667
	0.763	0.549	0.166	0.53			0.954	0.42	0.22186	0.494667
	0.786	0.632	0.251	0.387			1.802	0.3	0.300333	0.481818
	0.893	1.107	0.16	0.697			1.378	0.54	0.382778	0.502105
	0.316	0.842	0.544	0.637			4.484	0.318	0.260351	0.244615
	0.45	0.851	0.097	0.42			5.226	0.424	0.5565	0.265
	0.705	1.651	0.125	0.248			4.438	0.742	0.46	0.53
	3.514	0.682	0.165	0.488			6.438	0.636	0.497551	0.147907
	1.517	1.209	0.263	0.216			1.414	0.32	0.457727	0.674545
	0.626	1.959	0.305	0.46			2.12	0.33	0.557895	0.481818
	2.985	1.615	0.294	0.56			1.034	0.424	0.710435	0.0365517
	0.934	0.61	0.211	0.307			3.378	0.848	0.405294	0.565333
	0.945	0.611	0.507	0.33			1.06	0.636	0.278947	0.578182
	1.311	1.097	0.318	0.826			1.06	0.742	0.321212	0.618333
	0.671	0.95	0.157	0.297			1.378	0.424	0.313182	0.302857
	1.011	0.826	0.183	0.589			1.272	0.424	0.295814	0.282667
	1.203	0.803	0.144	0.475			2.014	1.06	0.457727	0.963636
	0.756	0.726	0.139	0.824			1.06	0.484	0.143636	0.9275
	0.531	0.808	0.177956	0.282			0.848	0.848	0.385455	0.385455
	4.876	0.814	0.113571	0.626			0.954	0.954	0.681429	0.561176
	2.862	1.342	0.0870149	0.498			6.212	0.348	0.192727	0.652308
	1.166	1.85	0.120455	0.597			0.636	0.742	0.334737	0.390526
	1.06	0.327	0.0904878	0.252			2.184	0.53	0.5936	0.407692
	1.484	0.422	0.225902	0.406			0.53	0.848	0.278947	0.706667
	2.756	0.584	0.27303	0.555			4.424	0.848	0.235556	0.53
	1.802	0.616	0.2385	1.031			1.166	1.272	0.506957	0.578182
	0.954	0.857	0.157037	0.336			0.954	0.424	0.433636	0.605714
	1.696	1.455	0.0795	0.54			0.34	0.636	0.436471	0.578182
	1.272	0.532	0.101236	0.584			0.472	0.53	0.282667	0.588889
	1.802	0.918	0.171231	0.531			4.696	0.636	0.413659	0.3975
	8.226	0.61	0.214524	0.154			0.954	0.636	0.194694	0.318
	1.802	0.65	0.181316	0.91			2.014	0.742	0.559444	0.353333
	1.378	0.22	0.129103	0.386			2.12	0.742	0.557895	0.494667
	2.014	0.315	0.227143	0.735			4.378	1.06	0.3445	0.6625
	3.816	0.405	0.540392	0.34			1.272	0.742	0.424	0.390526
	5.512	0.194	0.0918667	0.34			1.696	0.318	0.446316	0.318
	4.134	0.6	0.243119	0.841			0.424	0.636	0.201905	0.454286
	5.3	0.686	0.275192	0.403			1.59	0.384	0.136	0.424
	5.724	0.701	0.265	0.637			0.738	1.166	0.507917	0.613684
	3.922	0.863	0.217808	0.511			2.756	1.59	0.706667	0.836842
	3.18	1.017	0.3975	0.792			1.484	0.848	0.28	0.565333
	6.36	0.953	0.539298	0.369			1.696	0.848	0.245797	0.498824
	3.074	0.374	0.439512	0.873			1.378	0.848	0.328095	0.40381
	5.406	0.796	0.336	0.295			0.426	0.36	0.42	0.623529
	4.452	0.647	0.240676	0.434			1.696	0.848	0.625231	0.848
	4.982	0.409	0.366923	0.065			2.756	0.354	0.165195	0.681429
	11.062	0.061	0.314688	0.521			1.802	0.756	0.166852	0.43746
	7.014	0.329	0.28129	0.63			2.92	0.802	0.244615	0.300333
	1.802	0.427	0.322353	0.61			1.06	0.438	0.230435	0.297317
	1.908	0.464	0.490448	0.59			0.332	0.32	0.402069	0.282667
	3.286	0.62	0.574167	0.475			1.166	0.422	0.0979832	0.700357
	2.756	0.777	0.438621	0.477			2.65	0.498	0.284946	0.564194
	1.272	0.439	0.313182	0.555			2.84	0.344	0.239355	0.24
	1.378	0.442	0.63027	0.716			2.12	1.756	0.341935	0.51037
	7.532	0.711	0.332549	0.478			0.726	0.358	0.274815	0.735161
	1.696	0.507	0.365	0.23			3.816	0.312	0.502105	0.612444
	1.378	0.333	0.302703	0.842			2.78	0.386	0.126422	0.405679
	2.332	0.649	0.332549	0.639			1.59	0.968	0.162245	0.436471
	1.696	1.071	0.365	0.6			0.626	1.166	0.190256	0.583
	1.378	0.337	0.166571	0.749			4.77	1.166	0.472277	0.485833
	2.332	0.471	0.3625	0.715			1.06	0.954	0.120455	0.681429
	3.214	0.27	0.206372	0.512			0.954	0.848	0.109655	0.706667
	2.332	0.353	0.545143	0.892			2.968	0.742	0.395733	0.53
	1.908	0.339	0.454286	0.643			0.544	0.53	0.105714	0.33125
	1.908	0.571	0.645217	0.865			1.66	1.166	0.333143	0.72875
	8.968	0.561	0.151053	0.532			1.802	0.354	0.409545	0.867273
	0.954	0.524	0.318	0.87			0.684	0.24	0.285385	0.424
	2.226	0.526	0.329375	0.398			0.848	0.338	0.368696	0.770909
	2.014	0.734	0.181818	0.54			0.954	0.34	0.232683	0.954
	2.226	0.767	0.382778	0.725			0.78	0.548	0.270196	0.53
	1.378	0.626	0.483509	0.431			0.72	0.742	0.2544	0.674545
	9.756	0.29	0.0722727	0.439			0.59	0.48	0.361364	0.770909
	1.59	0.464	0.584828	0.501			0.59	1.46	0.289091	0.056383
	1.696	0.445	0.136667	0.481			3.59	0.742	0.260656	0.494667
	1.06	0.532	0.278947	0.575			2.014	0.53	0.394902	0.407692
	0.53	1.011	0.18	0.092			3.286	0.354	0.301468	0.681429
	0.954	0.876	0.353333	0.663			0.66	0.318	0.448462	0.3975
	0.954	0.344	0.192727	0.302			0.53	0.342	0.220833	0.824444
	0.636	0.533	0.402069	0.504			3.848	0.3	0.242286	0.481818
	2.332	0.547	0.345217	0.69			0.954	0.348	0.328966	0.848
	2.968	1.62	0.349412	0.475			0.954	0.32	0.227143	0.618333
	1.272	0.918	0.589333	0.092			0.636	0.358	0.159	0.795
	1.484	0.51	0.643571	0.964			1.908	0.38	0.389388	0.652308
	1.802	0.512	0.574167	0.776			4.166	0.314	0.242917	0.302857
	1.378	0.244	0.353333	0.749			3.848	0.348	0.192727	0.40381
	1.06	0.446	0.306842	0.844			3.378	0.424	0.626364	0.385455
	1.166	0.502	0.158391	0.422			1.84	0.436	0.049697	0.454286
	1.378	1.296	0.353333	0.497209			2.742	0.53	0.0968	0.278947
	0.954	1.06	0.139474	0.623529			0.636	0.48	0.0271429	0.652308
	0.53	0.53	0.292414	0.0868852			0.636	0.742	0.19875	0.53
	0.848	0.742	0.205161	0.390526			0.55	0.354	0.273548	0.681429
	0.636	0.636	0.319452	0.489231			1.89	0.48	0.441667	0.53
	2.332	0.424	0.462051	0.235556			2.54	0.3	0.326692	0.407692
	1.802	0.742	0.315593	0.564889			5.648	0.636	0.25697	0.424
	1.272	0.742	0.324231	0.46375			4.636	0.742	0.424	0.53
	1.166	0.636	0.319231	0.334737			0.53	0.36	0.33125	0.489231
	3.286	0.954	0.554091	0.561176			3.06	0.318	0.135556	0.289091
	2.438	0.742	0.318	0.337273			0.548	0.424	0.368696	0.385455
	1.59	1.06	0.40381	0.53			0.54	0.342	0.433636	0.53
	1.696	0.848	0.441667	0.424			0.742	0.436	0.2968	0.578182
	2.12	0.742	0.176667	0.436471			1.802	0.38	0.176667	0.848
	1.378	1.166	0.208214	0.832857			3.848	0.636	0.498824	0.53
	1.166	0.53	0.337273	0.278947			0.54	0.3	0.1385	0.378571
	2.226	0.742	0.33125	0.674545			3.954	0.312	0.433636	0.353333
	1.59	0.742	0.209535	0.9275			0.742	0.742	0.190256	0.494667
	1.802	1.06	0.399315	0.706667			0.78	0.53	0.459333	0.311765
	5.83	0.742	0.436471	0.371			2.454	0.32	0.53	0.494667
	4.452	0.954	0.310429	0.502105			1.166	0.348	0.448462	0.770909
	4.346	0.954	0.310505	0.733846			1.424	0.42	0.201905	0.436471
	3.074	0.954	0.346122	0.795			1.06	0.42	0.424	0.46375
	3.392	0.636	0.353333	0.3975			1.242	0.636	0.337273	0.424
	2.438	0.742	0.3816	0.674545			3.5	1.36	0.470588	0.454286
	0.954	0.742	0.2544	0.371			0.848	0.53	0.498824	0.378571
	1.636	0.848	0.452308	0.446316			0.742	0.318	0.570769	0.53
	3.848	1.06	0.294444	0.230435			1.342	1.06	0.322609	0.757143
	0.53	0.636	0.5512	0.578182			1.636	0.423	0.302857	0.265
	1.378	1.166	0.155882	0.431852			1.742	1.272	0.494667	0.713
	2.73	0.53	0.325067	0.278947			2.424	1.484	0.235556	0.674545
	2.438	0.848	0.192727	0.424			1.53	0.848	0.441667	0.471111
	2.824	1.166	0.1696	0.506957			1.93	0.848	0.407692	0.53
	4.724	0.742	0.378571	0.337273			0.848	0.424	0.498824	0.235556
	1.06	1.06	0.217436	0.588889			1.908	1.166	0.32339	0.632857
	0.848	0.848	0.424848	0.770909			0.848	1.06	0.353333	0.6625
	0.742	0.424	0.427143	0.471111			0.636	0.444	0.19875	0.824444
	0.636	0.636	0.446154	0.53			5.848	0.427	0.368696	0.385455
	0.636	1.166	0.271795	0.506957			1.118	0.636	0.19875	0.374118
	1.06	3.166	0.170968	0.583			1.818	0.742	0.19875	0.494667
	0.53	0.742	0.388889	0.322609			4.348	0.742	0.385455	0.570769
	1.06	0.954	0.239355	0.53			1.13	0.318	0.212	0.227143
	0.742	2.54	0.170769	0.733846			1.93	0.636	0.278947	0.374118
	0.742	1.378	0.223158	0.725263			1.83	0.848	0.230435	0.446316
	8.424	1.06	0.2968	0.441667			2.636	0.424	0.3975	0.385455
	3.742	0.742	0.314074	0.618333			3.036	0.424	0.276522	0.326154
	0.848	0.53	0.117778	0.240909			1.536	0.742	0.334737	0.494667
	3.424	1.378	0.265	0.626364			2.23	0.636	0.378571	0.289091
	0.636	1.166	0.3392	0.613684			2.136	0.742	0.334737	0.436471
	0.848	0.53	0.353333	0.33125			2.636	0.742	0.276522	0.371
	2.742	0.742	0.274815	0.46375			0.318	0.636	0.187059	0.53
	1.742	0.73	0.302857	0.311765			0.42	0.848	0.46375	0.498824
	2.636	2.3	0.1272	0.294444			0.3	0.53	0.33125	0.278947
	0.318	1.454	0.170968	0.477			1.142	0.377	0.309167	0.565333
	0.53	1.254	0.240909	0.477			0.636	0.354	0.235556	0.53
	0.53	0.636	0.192727	0.489231			1.166	0.424	0.176667	0.176667
	9.424	1.336	0.1696	0.374118			3.848	0.319	0.292414	0.570769
	7.424	0.424	0.481818	0.249412			4.53	0.4	0.294444	0.795
	1.06	1.742	0.265	0.570769			5.42	0.378	0.337273	0.781
	1.23	0.954	0.366923	0.53			0.954	0.954	0.477	0.667273
	0.954	0.536	0.289091	0.578182			2.53	0.848	0.182759	0.648
	3.636	1.436	0.176667	0.2544			0.848	0.46	0.326154	0.137662
	0.424	1.06	0.511724	0.46087			0.53	0.339	0.182759	0.441667
	1.484	1.272	0.25	0.605714			0.53	1.178	0.176667	0.86125
	2.01	0.636	0.71	0.489231			0.742	0.318	0.265	0.19875
		1.642		0.436471			0.53	0.42	0.311765	0.570769
		1.42		0.412222			0.636	1.154	0.289091	0.477
		0.424		0.502857			0.106	0.342	0.0706667	0.46375
		1.848		0.93			0.848	1.148	0.40381	0.353333
		1.954		0.477				0.54		0.502105
		4.06		0.857895				0.848		0.498824
		0.742		0.353333				0.4		0.53
		1.06		0.757895				0.32		0.436471
		0.53		0.43125				0.384		0.502105
		0.636		0.73				0.636		0.318
		0.36		0.334737				0.366		0.72875
		0.848		0.424				0.742		0.46375
		0.848		0.498824				0.324		0.59625
		0.53		0.252381				0.418		0.636
		0.848		0.565333				0.848		0.770909
		0.848		0.571111				1.06		0.623529
		0.53		0.481818				0.53		0.378571
		0.318		0.13
		0.636		0.353333
		0.742		0.43
		0.53		0.265
		0.53		0.411765
		0.424		0.282667
		0.212		0.151429

## Sheet: Rigor Obstacle
	NO RIGOR						WITH RIGOR
	MEASURED RUN LENGTHS (μm)		MEASURED VELOCITY (μm/sec)				MEASURED RUN LENGTHS (μm)		MEASURED VELOCITY (μm/sec)
	GFP-KIF18A1-480 WT	GFP-KIF18A1-480 sNL1	GFP-KIF18A1-480 WT	GFP-KIF18A1-480 sNL1			GFP-KIF18A1-480 WT	GFP-KIF18A1-480 sNL1	GFP-KIF18A1-480 WT	GFP-KIF18A1-480 sNL1
	2.673	1.676	0.519	0.543			1.587	0.341	0.337	0.248
	1.178	0.907	0.288	0.843			4.996	0.398	0.491	0.365
	2.706	0.706	0.275	0.626			0.493	1.084	0.385	0.542
	3.795	0.506	0.324	0.4			0.829	0.305	0.184	0.667
	3.758	0.555	0.397	1.082			1.27	0.71	0.604	0.409
	1.542	1.377	0.238	0.804			1.74	0.512	0.648	0.638
	1.457	1.431	0.316	0.28			0.734	1.084	0.128	0.152
	2.418	1.407	0.3	0.467			1.047	0.61	0.133	0.511
	5.974	0.384	0.727	0.627			0.338	0.412	0.176	0.707
	2.738	1.291	0.522	0.255			7.304	0.904	0.4	0.63
	2.616	1.162	0.49	0.727			1.202	0.335	0.12	0.247
	1.215	0.356	0.663	0.134			6.382	1.136	0.309	0.381
	2.444	1.26	0.23	0.592			1.151	0.381	0.44	0.55
	1.092	0.36	0.127	0.269			1.569	1.116	0.281	0.518
	4.375	1.101	0.655	0.427			1.64	0.355	0.072	0.628
	2.585	0.944	0.29	0.51			0.326	1.451	0.675	0.52
	0.633	0.778	0.597	0.44			2.09	0.647	0.38	0.507
	3.502	0.642	0.192	0.318			0.965	0.99	0.462	0.529
	1.454	0.73	0.375	0.536			3.753	1.214	0.58	0.43
	1.286	1.016	0.39	0.259			3.379	0.757	0.419	0.771
	2.077	0.686	0.571	0.218			0.586	0.937	0.044	0.636
	1.187	0.966	0.21	0.502			0.892	0.82	0.19	0.724
	1.225	0.39	0.39	0.383			0.695	0.422	0.429	0.74
	3.57	2.429	0.46	0.727			0.991	0.921	0.491	0.5
	2.029	0.876	0.538	0.89			1.892	0.794	0.164	0.645
	1.692	2.249	0.282	0.324			0.306	0.353	0.677	0.3
	4.027	1.844	0.148	0.79			1.207	1.217	0.512	0.556
	1.522	0.369	0.154	0.726			2.552	0.329	0.45	0.535
	1.331	0.376	0.261	0.618			4.525	0.415	0.26	0.584
	2.04	0.818	0.149	0.598			8.817	0.709	0.139	0.63
	1.733	0.376	0.284	0.76			2.38	0.422	0.279	0.771
	2.082	0.482	0.553	0.432			3.149	1.874	0.396	0.782
	1.422	1.61	0.402	0.47			5.921	0.144	0.313	0.272
	1.907	0.362	0.447	0.928			3.014	0.347	0.259	0.916
	1.021	0.497	0.35	0.422			1.392	0.38	0.194	0.211
	10.8	0.506	0.043	0.543			1.486	0.645	0.263	1.015
	7.73	0.794	0.123	0.455			2.685	0.866	0.562	0.51
	6.23	1.541	0.194	0.248			0.695	0.695	0.129	0.814
	0.345	1.157	0.117	0.606			5.991	1.2	0.491	0.72
	0.523	0.488	0.342	0.22			0.792	0.567	0.164	0.254
	0.623	1.292	0.233	1.08			0.429	1.489	0.177	0.312
	0.305	0.411	0.49	0.55			1.207	1.07	0.512	0.42
	5.415	2.676	0.384	0.95			2.552	0.963	0.745	0.237
	0.325	0.349	0.3	0.497			2.525	0.317	0.726	0.123
	0.786	0.409	0.311	0.68			4.817	0.511	0.139	0.89
	6.331	0.407	0.447	0.553			2.38	0.48	0.39	0.323
	0.422	0.581	0.53	0.403			2.149	0.498	0.796	0.741
	7.454	0.391	0.047	0.76			1.921	0.586	0.313	0.878
	0.457	0.592	0.1	0.452			3.014	0.737	0.259	0.666
	4.522	0.537	0.783	0.689			1.392	1.541	0.494	0.429
	0.542	0.666	0.318	0.103			1.486	0.566	0.63	0.562
	0.692	1.161	0.645	0.447			2.285		0.562
	0.733	0.304	0.404	0.343
	0.907	1.067	0.349	0.093
	1.029		0.128
