# Supplementary material for: KIF18A's neck linker permits navigation of microtubule-bound obstacles within the mitotic spindle
Source: Life Sci Alliance. 2019 Jan 17;2(1):e201800169. doi: 10.26508/lsa.201800169 (PMC6337737; doi:10.26508/lsa.201800169)
Supplement: Supplementary file 6 [file LSA-2018-00169_SdataF4.xlsx]

## Sheet: GFP-WT (18A siRNA)
	*Raw fluorescent intensities for each channel have been normalized to their heighest value, and aligned to peak kinetochore (ACA) intensity
	* Averages and standard deviations of each data set are found at the end of each experimental alignment
	*Included here are shorter lines scans that were not able to be included in the ratio of tip to lattice accumulation analysis
Experiment 1
	Line scan 1				2				3				4				5				6				7				8				9				10				11				12				13
Distance from peak ACA intensity (μm)	GFP	ACA	HURP		GFP	ACA	HURP		GFP	ACA	HURP		GFP	ACA	HURP		GFP	ACA	HURP		GFP	ACA	HURP		GFP	ACA	HURP		GFP	ACA	HURP		GFP	ACA	HURP		GFP	ACA	HURP		GFP	ACA	HURP		GFP	ACA	HURP		GFP
-1.6
-1.536
-1.472
-1.408
-1.344																					0.826389	0.651299	1
-1.28																					0.826389	0.662338	0.965883
-1.216																					0.794643	0.672727	0.949204		0.943034	0.758268	0.99243
-1.152																	0.904502	0.637128	0.979		0.816468	0.648701	0.960576		0.922166	0.776378	0.995458		0.937718	0.703838	0.983168
-1.088																	0.908595	0.649467	0.982		0.833829	0.680519	0.964367		0.936266	0.729921	0.958365		0.957509	0.708907	1																		0.895153
-1.024																	0.893588	0.696579	1		0.833829	0.680519	0.964367		0.890581	0.775591	0.97729		0.934226	0.692976	0.984698																		0.912463
-0.96																	0.88131	0.682557	0.971		0.831845	0.696104	0.968916		0.953751	0.792913	1		0.960419	0.706734	0.988523																		0.918892
-0.896					0.871967	0.616264	1										0.912688	0.724061	0.976		0.819444	0.694805	0.843063		0.917654	0.76378	0.955337		0.912107	0.732078	0.954858						0.917314	0.715059	1		0.884563	0.648952	0.976504						0.923343
-0.832					0.872803	0.653113	0.955047										0.911323	0.721256	0.927		0.822917	0.707143	0.857468		0.93401	0.811024	0.940954		0.913271	0.700217	0.953328						0.945583	0.753381	0.965802		0.889344	0.651877	0.955827						0.910485
-0.768					0.913808	0.650572	0.958439		0.875592	0.812008	0.954248						0.902456	0.786315	0.964		0.830357	0.741558	0.884003		0.904681	0.802362	0.918244		0.919674	0.747285	0.914308						0.912367	0.730839	0.975236		0.863388	0.689907	0.982143		0.930452	0.733293	1		0.91543
-0.704					0.89205	0.6349	0.93469		0.875592	0.812008	0.954248						0.896317	0.771733	0.944		0.8125	0.722727	0.921152		0.935702	0.8	0.919758		0.92142	0.729182	0.900536		0.897719	0.846489	0.995305		0.8947	0.750225	0.956368		0.873634	0.708922	1		0.882762	0.747742	0.958874		0.887735
-0.64	0.905714	0.752004	0.934555		0.912134	0.644642	0.937235		0.824882	0.75689	0.95207						0.873806	0.773416	0.992		0.842262	0.743506	0.87718		0.952623	0.822047	0.923543		0.895809	0.766836	0.912777		0.9117	0.820823	0.914319		0.860777	0.780884	0.92217		0.839481	0.712823	0.975564		0.867859	0.72065	0.955628		0.890702
-0.576	0.932381	0.797418	1		0.880335	0.656501	0.897371		0.843137	0.814469	0.954248						0.899045	0.784633	0.95		0.803075	0.736364	0.845337		0.952623	0.822047	0.923543		0.906286	0.802317	0.889824		0.924209	0.874092	0.955399		0.865724	0.732642	0.917453		0.894126	0.775232	0.967105		0.863388	0.756773	0.953463		0.888229
-0.512	0.917143	0.813446	0.931937		0.876151	0.650572	0.923664		0.912779	0.76378	0.921569		0.947583	0.692745	1		0.933151	0.789119	0.892		0.832837	0.721429	0.876422		0.901861	0.844094	0.855413		0.922584	0.774077	0.879112		0.919794	0.883777	0.937793		0.879859	0.771416	0.935142		0.878415	0.744515	0.898496		0.847988	0.724865	0.91342		0.919881
-0.448	0.920952	0.771149	0.91274		0.887029	0.670479	0.871925		0.887086	0.772638	0.947712		0.882914	0.722617	0.967539		0.894952	0.819405	0.968		0.75744	0.761688	0.847612		0.890581	0.853543	0.899319		0.934808	0.825489	0.851568		0.954378	0.866344	0.947183		0.887633	0.809288	0.9375		0.913934	0.739639	0.923872		0.851962	0.751355	0.938312		0.875865
-0.384	0.945714	0.72618	0.908377		0.906276	0.704786	0.895674		0.929682	0.792815	0.918301		0.881552	0.722143	0.967539		0.878581	0.749299	0.944		0.824901	0.742208	0.843821		0.893401	0.83622	0.823618		0.940629	0.832006	0.818669		0.963208	0.845521	0.934272		0.901767	0.785843	0.909198		0.909836	0.694783	0.863722		0.909091	0.758579	0.979437		0.925816
-0.32	0.949524	0.760018	0.911867		0.930544	0.728505	0.891433		0.916836	0.785925	0.934641		0.928523	0.71835	0.969634		0.935198	0.803141	0.936		0.824405	0.794156	0.841547		0.899041	0.84252	0.843301		0.93539	0.837075	0.833971		0.952907	0.816465	0.935446		0.882686	0.835888	0.926887		1	0.774744	0.843985		0.908594	0.743528	0.967532		0.940158
-0.256	0.938095	0.780053	0.925829		1	0.756459	0.85581		0.960108	0.821358	0.953159		0.955071	0.774301	0.928796		0.915416	0.819405	0.925		0.881944	0.793506	0.803639		0.871404	0.874016	0.822861		0.948196	0.830558	0.813313		0.965416	0.867797	0.934272		0.889046	0.853922	0.920991		0.973361	0.900536	0.795113		0.937407	0.845876	0.917749		0.980218
-0.192	1	0.808994	0.897906		0.971548	0.840322	0.895674		1	0.853839	0.961874		0.970728	0.807018	0.934031		0.991132	0.854739	0.969		0.962302	0.905195	0.798332		0.900169	0.874016	0.813777		0.948196	0.830558	0.813313		0.972038	0.843099	0.926056		0.966078	0.931019	0.909198		0.971311	0.979035	0.853383		1	0.84407	0.919913		1
-0.128	0.994286	0.84016	0.8726		0.955649	0.876324	0.909245		0.972279	0.881398	0.971678		1	0.890944	0.982199		1	0.905216	0.931		0.968254	0.943506	0.790751		0.91709	0.900787	0.799394		0.981374	0.895004	0.791125		1	0.911864	0.965962		0.966078	0.931019	0.909198		0.916667	0.957582	0.860902		0.913065	0.962673	0.92316		1
-0.064	0.984762	0.920748	0.924084		0.881172	0.966963	0.91179		0.955375	0.977854	0.980392		0.920354	0.979611	0.971728		0.962483	0.932698	0.966		1	0.947403	0.776346		1	0.977165	0.81302		1	0.921796	0.79036		0.979397	0.967554	0.96831		1	0.964382	0.966981		0.860656	0.992199	0.879699		0.913065	0.962673	0.92316		0.981207
0	0.944762	1	0.893543		0.883682	1	0.935539		0.849899	1	0.997821		0.903336	1	0.970681		0.970668	1	0.955		0.93254	1	0.793783		0.955443	1	0.762301		0.956345	1	0.787299		0.922737	1	0.914319		0.983746	1	0.971698		0.915301	1	0.827068		0.87233	1	0.893939		0.940158
0.064	0.927619	0.991986	0.905759		0.80251	0.976281	0.877014		0.830291	0.952756	0.918301		0.903336	1	0.970681		0.928377	0.929893	0.925		0.938492	0.933766	0.791509		0.955443	1	0.762301		0.960419	0.994207	0.768171		0.910228	0.995642	0.940141		0.95053	0.949053	0.92217		0.855874	0.915163	0.802632		0.866369	0.929561	0.892857		0.942631
0.128	0.913333	0.961264	0.883944		0.849372	0.964845	0.899067		0.812035	0.838091	0.928105		0.8516	0.948317	0.907853		0.920873	0.898486	0.947		0.833333	0.964286	0.81956		0.900169	0.992913	0.794852		0.949942	0.984794	0.765111		0.861663	0.952058	0.965962		0.857244	0.912985	0.96934		0.870902	0.859093	0.780075		0.846001	0.898856	0.890693		0.912463
0.192	0.915238	0.919858	0.873473		0.846025	0.913596	0.923664		0.849899	0.735728	0.948802		0.8516	0.876719	0.905759		0.856753	0.896242	0.933		0.816468	0.897403	0.762699		0.86802	0.934646	0.777441		0.901048	0.908762	0.781943		0.898455	0.893947	0.947183		0.840989	0.826871	0.962264		0.848361	0.843491	0.805451		0.843517	0.790488	0.874459		0.880317
0.256	0.889524	0.906055	0.885689		0.843515	0.885218	0.873622		0.830967	0.718996	0.924837		0.837985	0.847795	0.899476		0.841064	0.865956	0.953		0.773313	0.854545	0.828658		0.860688	0.886614	0.760787		0.849243	0.898624	0.748279		0.835173	0.846489	1		0.865018	0.751578	0.944575		0.846311	0.812774	0.795113		0.849478	0.794702	0.899351		0.895153
0.32	0.908571	0.842386	0.829843		0.856067	0.833545	0.849025		0.824206	0.718012	0.965142		0.863853	0.795164	0.904712		0.862892	0.898486	0.95		0.772321	0.854545	0.749052		0.888889	0.922047	0.77517		0.860303	0.817524	0.732976		0.878587	0.820339	0.991784		0.832509	0.764653	0.971698		0.817623	0.835202	0.819549		0.849478	0.794702	0.899351		0.84817
0.384	0.921905	0.841051	0.877836		0.845188	0.837357	0.927057		0.826234	0.683071	0.916122		0.83322	0.756757	0.949738		0.854707	0.871565	0.915		0.772321	0.854545	0.749052		0.806543	0.915748	0.757759		0.865541	0.842867	0.7215		0.844003	0.769492	0.99061		0.832509	0.720018	0.911557		0.874317	0.858118	0.760338		0.858917	0.768212	0.823593		0.828882
0.448	0.919048	0.834817	0.861257		0.844351	0.860652	0.863444		0.827586	0.695374	0.917211		0.875425	0.748696	0.953927						0.735615	0.83961	0.735406		0.808235	0.892126	0.720666		0.860885	0.782042	0.732976		0.864606	0.784504	0.956573		0.798587	0.741659	0.923349		0.848361	0.869332	0.777256		0.854943	0.789886	0.840909		0.838773
0.512	0.891429	0.811665	0.822862		0.841004	0.821262	0.868533		0.830967	0.707677	0.944444		0.811436	0.707444	0.892147						0.746528	0.823377	0.742229		0.835307	0.908661	0.705526		0.871944	0.818248	0.715379		0.865342	0.752058	0.901408		0.816961	0.686655	0.920991						0.860904	0.7646	0.87987		0.884273
0.576	0.94381	0.816118	0.842932		0.843515	0.841593	0.862595		0.763354	0.702264	1		0.830497	0.724514	0.908901						0.766865	0.781169	0.771797		0.814439	0.86063	0.725208		0.860885	0.805214	0.703137		0.852833	0.8523	0.956573		0.825442	0.691163	0.939858						0.864878	0.779049	0.86039		0.834817
0.64	0.928571	0.806322	0.836824		0.843515	0.872512	0.869381		0.815416	0.693406	0.962963		0.877468	0.751067	0.925654										0.85392	0.931496	0.743376		0.872526	0.825489	0.72609		0.885946	0.875545	0.962441														0.879327
0.704	0.930476	0.837934	0.834206										0.875425	0.71835	0.93089														0.869034	0.802317	0.703137		0.924945	0.905085	0.922535
0.768	0.905714	0.80098	0.856894
0.832	0.895238	0.816118	0.798429
0.896
0.96
1.024
1.088
1.152
Experiment 2
	Line scan 1			2			3			4			5			6			7			8			9			10			11			12			13			14			15			16			17
Distance from peak ACA intensity (μm)	GFP	ACA	HURP	GFP	ACA	HURP	GFP	ACA	HURP	GFP	ACA	HURP	GFP	ACA	HURP	GFP	ACA	HURP	GFP	ACA	HURP	GFP	ACA	HURP	GFP	ACA	HURP	GFP	ACA	HURP	GFP	ACA	HURP	GFP	ACA	HURP	GFP	ACA	HURP	GFP	ACA	HURP	GFP	ACA	HURP	GFP	ACA	HURP	GFP
-1.088	0	0	0	0	0	0	0.8894	0.6113	0.9183	0	0	0	0	0	0	0	0	0	0	0	0	0	0	0	0	0	0	0	0	0	0	0	0	0	0	0	0	0	0	0	0	0	0	0	0	0.8349	0.69	0.9267	0.8388
-1.024	0	0	0	0.9441	0.6376	0.9777	0.9139	0.5981	0.9134	0	0	0	0	0	0	0	0	0	0	0	0	0	0	0	0	0	0	0	0	0	0	0	0	0	0	0	0.9401	0.7319	1	0	0	0	0	0	0	0.8796	0.7206	0.9874	0.8382
-0.96	0.893	0.5807	0.9795	0.9117	0.6645	0.9625	0.8918	0.6025	0.9853	0	0	0	0	0	0	0	0	0	0	0	0	0.864	0.6043	0.9863	0	0	0	0.845	0.6546	0.9645	0	0	0	0	0	0	0.942	0.8006	0.9994	0	0	0	0	0	0	0.8625	0.6951	0.9314	0.8272
-0.896	0.9308	0.5885	0.9335	0.9429	0.6645	0.9673	0.8942	0.6176	0.933	0	0	0	0	0	0	0	0	0	0	0	0	0.888	0.5867	0.9499	0	0	0	0.8636	0.6483	0.9625	0.8526	0.6799	0.9981	0	0	0	0.9315	0.7695	0.9596	0.8894	0.7408	0.9968	0.9184	0.7146	0.9698	0.8129	0.6762	0.9283	0.8277
-0.832	0.9054	0.5938	0.9122	0.9563	0.6434	0.9713	0.8963	0.627	0.9837	0.9106	0.6399	0.9522	0.9666	0.6993	0.9527	0	0	0	0	0	0	0.9042	0.601	0.9863	0.7521	0.5892	1	0.9053	0.6448	0.9693	0.9207	0.6771	0.9757	0.9442	0.6895	1	0.9369	0.8107	0.9476	0.8788	0.6988	1	0.8864	0.7858	0.9698	0.7995	0.6944	0.9228	0.8053
-0.768	0.9199	0.6248	1	0.9278	0.6863	0.9984	0.8966	0.6207	0.9559	0.9404	0.6992	1	0.9382	0.6838	0.9836	0.9249	0.7377	1	0	0	0	0.9182	0.605	0.9544	0.7766	0.6061	0.9991	0.8444	0.6762	1	0.8835	0.719	0.9951	0.9464	0.6874	0.9127	0.956	0.7601	0.8793	0.9049	0.6894	0.9728	0.9229	0.7464	0.9598	0.8124	0.6973	0.9551	0.828
-0.704	0.909	0.6099	0.9655	0.9425	0.6901	0.949	0.9568	0.6251	1	0.9503	0.7239	0.9061	0.9666	0.7067	0.9739	0.927	0.7531	0.9789	0	0	0	0.9215	0.6173	1	0.7958	0.6159	0.9868	0.8444	0.6762	1	0.8952	0.6927	0.9766	0.9575	0.6807	0.9454	0.928	0.7999	0.8737	0.8696	0.727	0.9718	0.9223	0.7329	1	0.8289	0.6893	0.9417	0.8321
-0.64	0.9135	0.5807	0.9622	0.9172	0.6812	0.9936	0.925	0.647	0.9534	0.9209	0.6949	0.9433	0.9716	0.703	0.999	0.8684	0.7323	0.9769	0	0	0	0.888	0.6265	0.9663	0.826	0.6335	0.9934	0.8385	0.6937	0.9452	0.9213	0.7459	1	0.9464	0.7016	0.8671	0.9356	0.8302	0.88	0.8718	0.7198	0.9223	0.9413	0.7376	0.9729	0.8388	0.7104	0.9086	0.8382
-0.576	0.9356	0.6111	0.9614	0.9522	0.6831	1	0.9326	0.6558	0.9371	0.9503	0.7245	0.9681	0.9526	0.7475	1	0.9017	0.6991	0.9809	0.9625	0.634	0.962	0.9308	0.6545	0.9171	0.8186	0.6385	0.9764	0.8537	0.6741	0.975	0.9213	0.7459	1	0.9398	0.7307	0.8728	0.95	0.8064	0.8667	0.9104	0.714	0.8967	0.9377	0.7139	0.9667	0.842	0.6966	0.9575	0.8382
-0.512	0.9495	0.6534	0.9212	0.9461	0.685	0.9825	0.9544	0.6903	0.8987	0.9586	0.7616	0.9442	0.9526	0.7475	1	0.8724	0.6926	0.9849	0.9625	0.634	0.962	0.942	0.6356	0.9426	0.8186	0.6385	0.9764	0.8537	0.6741	0.975	0.8946	0.7544	0.9552	0.9098	0.6982	0.8863	0.9191	0.836	0.8339	0.8788	0.7335	0.9143	0.9039	0.741	0.969	0.8491	0.7338	0.9307	0.8139
-0.448	0.9544	0.6558	0.9031	0.9236	0.694	0.9458	0.9247	0.6853	0.8701	0.9401	0.7727	0.8902	0.9196	0.7618	0.9498	0.9125	0.7697	0.9538	0.9376	0.6535	1	0.9042	0.6754	0.9271	0.8646	0.6343	0.9821	0.8453	0.6699	0.9164	0.8676	0.7417	0.9465	0.9253	0.6976	0.8469	0.963	0.8201	0.8351	0.9474	0.7183	0.8749	0.9158	0.718	0.904	0.8633	0.736	0.9236	0.8382
-0.384	0.9565	0.6903	0.9179	0.9159	0.7068	0.9211	0.9411	0.7047	0.8881	0.9272	0.7993	0.9283	0.935	0.7933	0.9874	0.9229	0.7721	0.9377	0.9589	0.6848	0.943	0.9197	0.6988	0.9325	0.8956	0.6758	0.9197	0.8667	0.7048	0.9347	0.912	0.7729	0.9192	0.9433	0.7449	0.8159	0.9328	0.8049	0.832	0.9301	0.7784	0.8679	0.9374	0.7214	0.9551	0.9174	0.7309	0.8739	0.8402
-0.32	0.9217	0.7135	0.9039	0.9079	0.7286	0.8509	0.9217	0.7511	0.8995	0.9272	0.7993	0.9283	0.9189	0.7611	0.9874	0.9569	0.8208	0.9487	0.93	0.6883	0.9447	0.9253	0.6734	0.9125	0.9896	0.7498	0.8763	0.8667	0.7048	0.9347	0.9444	0.8048	0.9056	0.9367	0.7422	0.8255	0.9898	0.8273	0.825	0.9216	0.7661	0.8445	0.9537	0.6949	0.8808	0.9425	0.7965	0.9291	0.8703
-0.256	0.9628	0.7564	0.9122	0.9339	0.8009	0.8644	0.9628	0.7962	0.9077	0.9745	0.8715	0.8565	0.9666	0.8602	0.942	1	0.876	0.9116	0.9636	0.6747	0.9465	0.898	0.7086	0.8678	0.958	0.7865	0.949	0.9205	0.753	0.926	0.9444	0.8048	0.9056	0.9284	0.77	0.8429	1	0.8692	0.8099	0.9441	0.7973	0.8296	0.9938	0.7417	0.8847	0.9584	0.7761	0.9393	0.875
-0.192	0.9541	0.8017	0.899	0.9368	0.8099	0.8389	0.9807	0.8477	0.9265	1	0.9858	0.8583	0.9666	0.8602	0.942	0.9872	0.9229	0.9729	1	0.7928	0.8843	1	0.8814	0.8888	1	0.8125	0.9358	0.9621	0.8521	0.9837	1	0.7892	0.9133	0.9488	0.795	0.8502	0.9997	0.9306	0.7972	0.9569	0.7944	0.8014	1	0.7973	0.9303	1	0.8818	0.9772	0.9447
-0.128	1	0.9166	0.9171	1	0.9142	0.8158	1	0.9649	0.9126	1	0.9858	0.8583	0.9716	0.914	0.9469	0.9219	0.9733	0.9176	0.9459	0.8701	0.8782	0.9601	0.9987	0.8614	0.8911	0.9316	0.9396	0.9621	0.8521	0.9837	0.9925	0.8141	0.9036	0.9718	0.8918	0.848	0.9082	0.9921	0.8004	1	0.8653	0.738	0.9291	0.857	0.9427	0.9086	0.9424	0.9693	1
-0.064	0.9707	0.9321	0.9729	0.9939	0.9622	0.8445	0.9707	0.9812	0.9681	0.9576	0.9969	0.9486	1	0.9938	0.9121	0.8802	0.9953	0.9598	0.8922	0.9433	0.8662	0.9294	0.9785	0.8733	0.8116	0.9112	0.9537	1	0.9484	0.9827	0.9646	0.9489	0.9299	1	0.9493	0.8232	0.84	0.9725	0.8124	0.9979	0.9218	0.7625	0.9021	0.9383	0.9799	0.8425	0.9562	0.9535	1
0	0.9595	1	0.8966	0.9214	1	0.7975	0.9108	1	0.911	0.9258	1	0.8946	0.9119	1	0.9643	0.8341	1	0.9678	0.8222	1	0.8368	0.8787	1	0.8414	0.8093	1	0.9075	0.95	1	0.9606	0.8571	1	0.9318	0.9972	1	0.8395	0.8107	1	0.8086	0.8964	1	0.779	0.86	1	0.9195	0.8502	1	1	0.9264
0.064	0.8803	0.9649	0.931	0.8433	0.9661	0.7975	0.8486	0.9718	0.9126	0.8235	0.9302	0.9008	0.8385	0.9109	0.8928	0.7664	0.8855	0.8724	0.8042	0.9563	0.8592	0.8417	0.8761	0.8432	0.7628	0.8612	0.9311	0.95	1	0.9606	0.8571	1	0.9318	0.9879	0.931	0.8654	0.8547	0.9241	0.7979	0.8551	0.9761	0.7758	0.8704	0.9464	0.9489	0.8425	0.8702	0.9929	0.9029
0.128	0.8316	0.8737	0.881	0.8257	0.8777	0.7743	0.8316	0.9198	0.8766	0.799	0.9209	0.9008	0.8385	0.9109	0.8928	0.7452	0.8178	0.8854	0.8089	0.8477	0.8575	0.8086	0.8168	0.8733	0.7255	0.7731	0.9415	0.8869	0.9833	0.951	0.8066	0.9894	0.9357	0.915	0.9019	0.8063	0.8123	0.8331	0.7435	0.8736	0.9276	0.7268	0.8226	0.8976	0.9288	0.8349	0.7754	0.9535	0.8269
0.192	0.844	0.7927	0.8539	0.783	0.8688	0.811	0.8431	0.8307	0.8677	0.7805	0.8635	0.9035	0.7749	0.841	0.8879	0.762	0.7223	0.9176	0.7797	0.7385	0.8005	0	0	0	0	0	0	0.7968	0.8576	0.8876	0.7904	0.9276	0.9153	0.8487	0.8789	0.7911	0.7868	0.8114	0.7536	0.8411	0.8776	0.7657	0.8419	0.819	0.942	0.8181	0.7637	0.9614	0.8349
0.256	0.8298	0.7832	0.876	0.7647	0.806	0.7679	0.8056	0.8144	0.8693	0.7646	0.7659	0.8477	0.8178	0.7989	0.856	0	0	0	0.8006	0.7019	0.8428	0	0	0	0	0	0	0.7968	0.8576	0.8876	0.7868	0.8481	0.964	0.8775	0.8342	0.7714	0.7817	0.7919	0.7315	0.8326	0.8421	0.7396	0.8271	0.7797	0.9141	0.7674	0.7586	0.9543	0.8637
0.32	0.7769	0.7755	0.8588	0	0	0	0	0	0	0	0	0	0.7619	0.7061	0.8841	0	0	0	0	0	0	0	0	0	0	0	0	0.7614	0.806	0.8252	0	0	0	0.8822	0.8018	0.7849	0	0	0	0.8384	0.832	0.7508	0.8072	0.7464	0.887	0	0	0	0.8244
0.384	0	0	0	0	0	0	0	0	0	0	0	0	0	0	0	0	0	0	0	0	0	0	0	0	0	0	0	0.7642	0.7593	0.8425	0	0	0	0.875	0.7889	0.7748	0	0	0	0	0	0	0.7995	0.7627	0.9102	0	0	0	0
0.448	0	0	0	0	0	0	0	0	0	0	0	0	0	0	0	0	0	0	0	0	0	0	0	0	0	0	0	0	0	0	0	0	0	0	0	0	0	0	0	0	0	0	0	0	0	0	0	0	0
0.512	0	0	0	0	0	0	0	0	0	0	0	0	0	0	0	0	0	0	0	0	0	0	0	0	0	0	0	0	0	0	0	0	0	0	0	0	0	0	0	0	0	0	0	0	0	0	0	0	0
0.576	0	0	0	0	0	0	0	0	0	0	0	0	0	0	0	0	0	0	0	0	0	0	0	0	0	0	0	0	0	0	0	0	0	0	0	0	0	0	0	0	0	0	0	0	0	0	0	0	0
0.64	0	0	0	0	0	0	0	0	0	0	0	0	0	0	0	0	0	0	0	0	0	0	0	0	0	0	0	0	0	0	0	0	0	0	0	0	0	0	0	0	0	0	0	0	0	0	0	0	0
0.704	0	0	0	0	0	0	0	0	0	0	0	0	0	0	0	0	0	0	0	0	0	0	0	0	0	0	0	0	0	0	0	0	0	0	0	0	0	0	0	0	0	0	0	0	0	0	0	0	0
0.768	0	0	0	0	0	0	0	0	0	0	0	0	0	0	0	0	0	0	0	0	0	0	0	0	0	0	0	0	0	0	0	0	0	0	0	0	0	0	0	0	0	0	0	0	0	0	0	0	0
0.832	0	0	0	0	0	0	0	0	0	0	0	0	0	0	0	0	0	0	0	0	0	0	0	0	0	0	0	0	0	0	0	0	0	0	0	0	0	0	0	0	0	0	0	0	0	0	0	0	0
[truncated: 29 more columns]

## Sheet: GFP-WT (HURP&18A siRNA)
Experiment 1
	Line scan 1			2			3			4			5			6			7			8			9			10			11			AVERAGE			STANDARD DEVIATION
Distance from peak ACA intensity (μm)	GFP	ACA		GFP	ACA		GFP	ACA		GFP	ACA		GFP	ACA		GFP	ACA		GFP	ACA		GFP	ACA		GFP	ACA		GFP	ACA		GFP	ACA		GFP	ACA		GFP	ACA
-1.6
-1.536
-1.472
-1.408
-1.344
-1.28
-1.216
-1.152
-1.088
-1.024																			0.909571	0.642321
-0.96																0.884579	0.680168		0.909571	0.642321														0.897075	0.661244		0.017672	0.0267615
-0.896																0.902081	0.71648		0.90231	0.683842														0.902196	0.700161		0.000161835	0.0230789
-0.832	0.891714	0.639824											0.924544	0.614291		0.894986	0.723813		0.926733	0.643322														0.909494	0.655312		0.0177311	0.0567403
-0.768	0.9129	0.657051											0.911827	0.591602		0.925733	0.679818		0.883168	0.651826														0.908407	0.645074		0.0217044	0.045079
-0.704	0.890772	0.658253					0.928144	0.747751		0.968204	0.611212		0.942348	0.622079		0.944655	0.710894		0.877228	0.644822		0.791541	0.794056											0.906127	0.684153		0.0649008	0.0740907
-0.64	0.929379	0.674679		0.825318	0.751642		0.93275	0.723282		0.942678	0.621769		0.925392	0.598713		0.907758	0.685405		0.89835	0.696348		0.791541	0.794056		0.899412	0.552012								0.894731	0.677545		0.0537262	0.0816398
-0.576	0.913842	0.703926		0.834392	0.724138		0.921234	0.707449		0.945365	0.630142		0.938533	0.631561		0.96263	0.716131		0.886469	0.688844		0.787915	0.800834		0.925539	0.559372								0.901769	0.684711		0.060496	0.0737048
-0.512	0.915254	0.68149		0.876588	0.722906		0.939659	0.723282		0.900582	0.62723		0.949979	0.655943		0.980605	0.70426		0.947855	0.715858		0.824169	0.794056		0.873939	0.573111								0.91207	0.688682		0.0517496	0.0682975
-0.448	0.944915	0.692308		0.871597	0.74179		1	0.731198		0.91133	0.657809		0.930055	0.635286		0.952696	0.689944		0.926073	0.732866		0.83565	0.823253		0.927498	0.57213		0.993289	0.613822					0.92931	0.689041		0.052501	0.0772044
-0.384	0.904426	0.676282		0.873866	0.759031		0.972824	0.709608		0.925661	0.684019		0.933446	0.664409		0.933775	0.70426		0.916172	0.701351		0.818731	0.832638		0.949706	0.597645		1	0.637563					0.922861	0.696681		0.0532176	0.0680781
-0.32	0.935499	0.729968		0.906534	0.804598		0.969139	0.720403		0.932378	0.700764		0.986435	0.704707		0.918638	0.713338		0.916172	0.712856		0.839879	0.81804		0.923579	0.614818		0.96289	0.661831		1	0.750834		0.935558	0.721105		0.0464621	0.0604291
-0.256	0.957627	0.745994		0.923321	0.847701		0.986642	0.812163		0.887147	0.661449		0.986435	0.704707		0.919584	0.730796		0.978218	0.741371		0.87432	0.833681		0.920967	0.640824		0.985195	0.721182		0.986232	0.747289		0.945972	0.744287		0.0446042	0.0692493
-0.192	1	0.828125		0.975499	0.896141		0.986642	0.890608		0.92163	0.757918		1	0.793769		0.995743	0.803422		0.978218	0.741371		0.883384	0.862878		0.937296	0.665849		0.972562	0.78449		0.982065	0.814012		0.96664	0.803507		0.0373464	0.0707797
-0.128	0.973164	0.978766		1	0.921182		0.979272	0.906801		0.901926	0.759738		0.952522	0.866915		0.995743	0.803422		0.943234	0.802401		0.934743	0.892596		0.986937	0.789009		0.960324	0.868636		0.972283	0.878232		0.96365	0.8607		0.0305509	0.055606
-0.064	0.960452	0.978365		0.955082	0.995074		0.986642	0.969773		0.966413	0.937022		0.94362	0.945141		1	0.933659		1	0.909455		1	0.98488		0.983671	0.852797		0.986182	0.91005		0.934239	0.974771		0.974209	0.944635		0.0243218	0.0429945
0	0.996704	1		0.914701	1		0.919853	1		1	1		0.900805	1		0.969726	1		0.936634	1		0.955891	1		1	1		0.924595	1		0.900725	1		0.947239	1		0.037501	0
0.064	0.922316	0.891026		0.908348	0.988095		0.970981	0.866139		0.971787	0.991991		0.846969	0.95022		0.942289	0.955656		0.919472	0.998999		0.957704	0.977059		0.940562	0.986261		0.971378	0.993405		0.909964	0.971435		0.932888	0.960935		0.0392815	0.039239
0.128	0.867232	0.847356		0.844374	0.901478		0.921234	0.844908		0.943574	0.922097		0.867741	0.921774		0.949858	0.938897		0.89769	0.912456		0.912387	0.974453		0.918354	0.847399		0.939005	0.944869		0.870109	0.944954		0.902869	0.909149		0.0356948	0.0417163
0.192	0.893597	0.779647		0.849365	0.858785		0.964072	0.861461		0.918943	0.881325					0.913907	0.857542		0.867987	0.827414		0.855589	0.857664		0.905944	0.763984		0.939005	0.944869		0.888587	0.858424		0.8997	0.849112		0.038575	0.0472567
0.256	0.888889	0.817308		0.855263	0.786125		0.927222	0.786974		0.900134	0.772115					0.900662	0.818436		0.842904	0.785393		0.841692	0.846194		0.859569	0.711482		0.964469	0.896333		0.896377	0.838824		0.887718	0.805918		0.0415635	0.0527434
0.32	0.861582	0.798878		0.817151	0.7422		0.964993	0.760345		0.890282	0.726611					0.870388	0.790154		0.849505	0.765383		0.85136	0.753389		0.97518	0.630029		0.949072	0.91981		0.88913	0.868015		0.891864	0.775481		0.055844	0.08293
0.384	0.864407	0.770433		0.832123	0.752463		0.905573	0.767542		0.875056	0.717146					0.858089	0.728352		0.813201	0.795398		0.844109	0.768509		0.928152	0.631011		0.950651	0.927987		0.891486	0.848624		0.876285	0.770746		0.0455404	0.0836235
0.448	0.840395	0.770032		0.846642	0.737274		0.921234	0.768262		0.88043	0.702221					0.89404	0.746508		0.846865	0.802901		0.87432	0.74244		0.975833	0.667812								0.88497	0.742181		0.0455057	0.0436404
0.512				0.887477	0.785304		0.964532	0.723642		0.918943	0.71205					0.829707	0.706704		0.810561	0.801401		0.83142	0.743483		0.93599	0.631992								0.882661	0.729225		0.0598814	0.0560432
0.576							0.949793	0.688377		0.953874	0.742628					0.832072	0.734288					0.839879	0.748175											0.893904	0.728367		0.0669871	0.0272641
0.64
0.704
0.768
0.832
0.896
0.96
1.024
1.088
1.152
Experiment 2
	Line scan 1		2		3		4		5		6		7		8		9		10		AVERAGE		STANDARD DEVIATION
Distance from peak ACA intensity (μm)	GFP	ACA	GFP	ACA	GFP	ACA	GFP	ACA	GFP	ACA	GFP	ACA	GFP	ACA	GFP	ACA	GFP	ACA	GFP	ACA	GFP	ACA	GFP	ACA
-1.088	0	0	0	0	0	0	0	0	0	0	0.9928	0.5401	0	0	0	0	0	0	0	0	0	0	0	0
-1.024	0.9559	0.8661	0	0	0	0	0	0	0	0	0.9849	0.5654	0	0	0	0	0	0	0	0	0	0	0.0145	0.1504
-0.96	1	0.8859	0	0	1	0.8274	0	0	0	0	0.9827	0.5608	0	0	0	0	0	0	0	0	0.9942	0.7581	0.0082	0.1415
-0.896	0.9917	0.8607	0	0	0.966	0.8157	0	0	0	0	0.9559	0.5856	0	0	0	0	0	0	0	0	0.9712	0.754	0.0151	0.1205
-0.832	0.9609	0.832	0.9679	0.7222	0.984	0.7967	0	0	0	0	0.9537	0.5674	0.9849	0.7006	0	0	0	0	0.9295	0.663	0.9635	0.7136	0.019	0.0867
-0.768	0.9635	0.8941	0.9407	0.6996	0.9643	0.7303	0	0	0.9083	0.734	0.9883	0.5623	0.9647	0.688	0	0	0	0	0.8921	0.7144	0.946	0.7176	0.0319	0.0902
-0.704	0.9808	0.8361	0.9481	0.7209	0.9643	0.7303	0	0	0.9083	0.734	0.9379	0.6355	0.9659	0.7383	0	0	0.9238	0.6927	0.8699	0.6963	0.9374	0.723	0.0338	0.053
-0.64	0.9392	0.8784	0.9582	0.7372	0.932	0.7359	0	0	0.9057	0.7811	0.9333	0.6169	0.9706	0.7383	0.9013	0.6862	0.9465	0.6955	0.8553	0.7041	0.9269	0.7304	0.0329	0.0678
-0.576	0.966	0.8272	0.9289	0.7359	0.9487	0.7684	0.9455	0.7515	0.9019	0.7791	0.9171	0.6371	0.9555	0.788	0.9013	0.6862	0.9434	0.7193	0.8699	0.7087	0.9278	0.7401	0.0284	0.0522
-0.512	0.9074	0.8306	0.9773	0.7322	0.9487	0.7684	0.9586	0.7185	0.9409	0.798	0.9578	0.6472	0.9413	0.7814	0.9643	0.704	0.8981	0.6761	0.884	0.7279	0.9378	0.7384	0.0294	0.0536
-0.448	0.907	0.8238	0.9718	0.8154	0.9736	0.7647	0.9667	0.7064	0.9198	0.8216	0.9266	0.6552	0.9282	0.7862	0.945	0.7078	0.8744	0.7342	0.8959	0.6926	0.9309	0.7508	0.0318	0.0571
-0.384	0.9316	0.8504	0.955	0.7678	0.9884	0.7518	0.959	0.7214	0.9509	0.8465	0.9895	0.7087	1	0.8036	0.9597	0.7217	0.9094	0.7497	0.9523	0.7165	0.9596	0.7638	0.0261	0.0501
-0.32	0.9428	0.8245	1	0.7929	0.9884	0.7518	0.959	0.7214	0.9868	0.8667	0.9416	0.7072	0.9996	0.8719	0.937	0.7261	0.9295	0.7857	0.9127	0.7181	0.9597	0.7766	0.03	0.0585
-0.256	0.895	0.8757	0.9627	0.7904	0.9629	0.7414	0.9702	0.752	1	0.8801	0.9665	0.7501	0.9996	0.8719	0.9835	0.7605	1	0.8461	0.9263	0.757	0.9667	0.8025	0.0322	0.0558
-0.192	0.9537	0.8934	0.9672	0.8623	0.955	0.7869	0.9924	0.7561	0.9674	0.8801	1	0.7734	0.9944	0.9258	0.9733	0.8003	0.9624	0.8876	0.9214	0.7778	0.9687	0.8344	0.0222	0.0583
-0.128	0.9674	0.9474	0.9554	0.9024	0.9354	0.8735	0.9924	0.7561	0.937	0.8889	0.977	0.8637	0.9524	0.9587	1	0.8999	0.9527	0.9668	0.9794	0.8884	0.9649	0.8946	0.021	0.0573
-0.064	0.9663	0.985	0.9707	0.9831	0.9354	0.8735	1	0.8751	0.9097	0.9798	0.9153	0.9399	0.9377	0.9922	0.979	0.965	0.8991	0.9851	0.9458	0.9377	0.9459	0.9516	0.0311	0.0426
0	0.9439	1	0.9857	1	0.9402	1	0.9992	1	0.8585	1	0.9138	1	0.8865	1	0.9052	1	0.9074	1	1	1	0.934	1	0.0462	0
0.064	0.895	0.9829	0.9324	0.9381	0.9042	0.9705	0.9992	1	0.807	0.9859	0.8893	0.995	0.9198	1	0.8893	0.9752	0.8703	0.9923	0.9062	0.9886	0.9013	0.9828	0.0459	0.0176
0.128	0.8817	0.959	0.8881	0.9531	0.9042	0.9705	0.9657	0.9792	0.7635	0.9589	0.8411	0.9157	0.9067	0.882	0.8808	0.9494	0.841	0.9313	0.8921	0.8868	0.8765	0.9386	0.0504	0.0321
0.192	0	0	0.8794	0.8479	0.9242	0.8956	0.9514	0.8578	0.7538	0.8815	0.8539	0.8703	0.8793	0.8916	0.882	0.9187	0.8729	0.9014	0.8856	0.8287	0.8758	0.8771	0.0512	0.0269
0.256	0	0	0.8236	0.8492	0.9228	0.8305	0.9514	0.8578	0.7144	0.897	0.8738	0.7789	0.8666	0.9431	0.8956	0.8859	0.8456	0.8782	0.9035	0.7825	0.8664	0.8559	0.065	0.0502
0.32	0	0	0.8448	0.8298	0.9228	0.8305	0.9395	0.811	0.7247	0.8431	0.8388	0.7784	0	0	0.8536	0.8488	0.8471	0.8843	0	0	0.8531	0.8323	0.0645	0.0304
0.384	0	0	0	0	0.9478	0.774	0.9305	0.8249	0	0	0.8429	0.7804	0	0	0	0	0.86	0.8616	0	0	0.8953	0.8102	0.0447	0.0355
0.448	0	0	0	0	0.9441	0.785	0	0	0	0	0	0	0	0	0	0	0	0	0	0	0	0	0	0
0.512	0	0	0	0	0	0	0	0	0	0	0	0	0	0	0	0	0	0	0	0	0	0	0	0
0.576	0	0	0	0	0	0	0	0	0	0	0	0	0	0	0	0	0	0	0	0	0	0	0	0
0.64	0	0	0	0	0	0	0	0	0	0	0	0	0	0	0	0	0	0	0	0	0	0	0	0
0.704	0	0	0	0	0	0	0	0	0	0	0	0	0	0	0	0	0	0	0	0	0	0	0	0
0.768	0	0	0	0	0	0	0	0	0	0	0	0	0	0	0	0	0	0	0	0	0	0	0	0
0.832	0	0	0	0	0	0	0	0	0	0	0	0	0	0	0	0	0	0	0	0	0	0	0	0
	0	0	0	0	0	0	0	0	0	0	0	0	0	0	0	0	0	0	0	0	0	0	0	0

## Sheet: GFP-sNL1 (18A siRNA)
Experiment 1
	Line scan 1				2				3				4				5				6				7				8				9				10				11				12
Distance from peak ACA intensity (μm)	GFP	ACA	HURP		GFP	ACA	HURP		GFP	ACA	HURP		GFP	ACA	HURP		GFP	ACA	HURP		GFP	ACA	HURP		GFP	ACA	HURP		GFP	ACA	HURP		GFP	ACA	HURP		GFP	ACA	HURP		GFP	ACA	HURP		GFP	ACA	HURP		GFP
-1.92																																													0.939013	0.588531	0.993671
-1.856																																													0.948693	0.612809	1
-1.792																																													0.9303	0.585182	0.973779
-1.728																																													0.933204	0.584345	0.94575
-1.664																																													0.927396	0.61532	0.925859
-1.6																																													0.943853	0.597321	0.943038
-1.536	0.957497	0.692698	0.966401																																										0.938045	0.60067	0.896022
-1.472	0.943329	0.709206	0.962865																																										1	0.60946	0.838156
-1.408	0.987013	0.72	0.945181																																										0.938045	0.640435	0.905063
-1.344	0.917355	0.715556	0.946065																										0.911298	0.564215	0.968675		0.992993	0.580479	0.976112										0.950629	0.634157	0.899638		0.943069
-1.28	0.988194	0.711746	0.952255																										0.88422	0.572448	0.979116		0.947948	0.58847	1		0.905314	0.569731	0.961577						0.950629	0.634157	0.899638		0.935261
-1.216	0.961039	0.726349	0.948718																										0.953315	0.603732	0.968675		0.991992	0.609589	0.938221		0.885024	0.602273	0.975733						0.958374	0.632482	0.889693		0.949949
-1.152	0.956316	0.763175	1																						1	0.642588	0.961158		0.927171	0.587816	0.998394		0.973974	0.597032	0.921746		0.938164	0.606405	1						0.983543	0.652574	0.842676		0.963195
-1.088	0.990555	0.767619	0.943413														0.951684	0.683467	0.914312						0.949962	0.638814	0.931497		0.937442	0.597695	1		0.964965	0.619863	0.906096		0.876329	0.598657	0.946411		0.900098	0.523952	0.901246		0.929332	0.650481	0.858047		0.937546
-1.024	0.998819	0.761905	0.938992														0.990483	0.66134	0.885141						0.940106	0.64097	0.903955		0.936508	0.612514	0.943775		1	0.607306	0.865733		0.903382	0.635847	0.992922		0.94907	0.506416	0.905081		0.966118	0.632482	0.868897		0.960561
-0.96	0.971665	0.71746	0.966401														0.964129	0.68531	0.938924						0.952995	0.65283	0.918785		0.919701	0.602634	0.942169		0.965966	0.627283	0.837727		0.914976	0.635331	0.906977		0.933399	0.544055	1		0.959342	0.634994	0.849005		0.947771
-0.896	0.957497	0.805714	0.929266		0.932339	0.736321	0.98265										0.997804	0.671174	1		1	0.67151	0.907692		0.921152	0.673315	0.925847		0.971989	0.602634	0.897992		0.965966	0.627283	0.837727		0.903382	0.669421	0.971689		0.899119	0.573567	0.936721		0.908035	0.629134	0.826401		0.945728
-0.832	0.971665	0.779683	0.939876		0.932339	0.736321	0.98265										1	0.687769	0.915223		1	0.67151	0.907692		0.921152	0.673315	0.925847		0.940243	0.627881	0.872289		0.965966	0.638699	0.83196		0.898551	0.683884	0.948433		0.911851	0.562874	0.899329		0.910939	0.634575	0.840868		0.945271
-0.768	0.972845	0.75873	0.965517		0.941514	0.730501	1		0.864458	0.686207	0.871257						0.921669	0.69453	0.937101		0.980514	0.663726	1		0.908264	0.681402	0.982345		1	0.643249	0.878715		0.938939	0.66153	0.85832		0.960386	0.64876	0.962588		0.905975	0.594525	0.928092		0.942885	0.631226	0.857143		0.939768
-0.704	0.985832	0.824127	0.969938		0.916284	0.739814	0.961356		0.945783	0.695172	0.89022		0.973477	0.76269	0.97619		0.956808	0.697603	0.964448		0.943102	0.692787	0.953147		0.934799	0.686792	0.943503		0.923436	0.693194	0.861847		0.987988	0.638699	0.861614		0.903382	0.661157	0.898888		0.900098	0.562447	0.930968		0.946757	0.6509	0.896926		0.943146
-0.64	0.949233	0.76	0.958444		0.888761	0.691502	0.896688		0.926205	0.683448	0.917166		0.982796	0.779829	0.969697		0.937042	0.678549	0.941659		0.951676	0.689673	0.959441		0.957544	0.704043	0.935734		0.926237	0.726674	0.798394		0.942943	0.66895	0.834432		0.923671	0.648244	0.89181		0.903036	0.579555	0.930968		0.946757	0.6509	0.896926		0.936325
-0.576	0.952774	0.780317	0.91954		0.946101	0.729919	0.925079		0.932982	0.717241	0.912176		0.954122	0.78708	0.957792		0.942167	0.68531	0.886964		0.91894	0.677218	0.932168		0.986353	0.732615	0.964689		0.889823	0.733809	0.796787		0.943944	0.663813	0.847611		0.932367	0.685434	0.947422		0.944172	0.578272	0.911793		0.939013	0.66262	0.878843		0.94023
-0.512	0.943329	0.831746	0.983201		0.96445	0.733993	0.910883		0.936747	0.69931	1		0.950538	0.81938	0.910173		0.948755	0.693301	0.929809		0.923617	0.686559	0.920979		0.946171	0.743396	0.947034		0.90943	0.802964	0.788755		0.943944	0.663813	0.847611		0.941063	0.678202	0.897877		0.924584	0.600513	0.910834		0.948693	0.694014	0.886076		0.94011
-0.448	0.985832	0.850159	0.955791		0.980505	0.726426	0.909306		0.917169	0.709655	0.93014		1	0.81938	0.943723		0.980966	0.676091	0.886053		0.943102	0.672548	0.955245		0.974223	0.76496	0.949153		0.907563	0.804061	0.772691		0.960961	0.692922	0.812191		0.989372	0.719008	0.922144		0.922625	0.606074	0.879195		0.951597	0.677271	0.900542		0.959493
-0.384	0.952774	0.888889	0.93015		0.980505	0.726426	0.909306		0.946536	0.721379	0.908184		0.963441	0.808833	0.964286		0.979502	0.700676	0.882407		0.931411	0.733264	0.959441		0.953753	0.808086	0.954096		0.901961	0.762898	0.805622		0.961962	0.707192	0.804778		0.964251	0.736054	0.89181		0.976494	0.653122	0.870566		0.909003	0.73671	0.882459		0.951799
-0.32	1	0.886349	0.969054		0.946101	0.736321	0.962145		0.964608	0.753793	0.938124		0.967025	0.841793	0.974026		0.931186	0.723417	0.853236		0.938426	0.692787	0.928671		0.980288	0.848518	0.980932		0.901961	0.762898	0.805622		0.921922	0.693493	0.794893		0.968116	0.831095	0.889788		0.941234	0.634731	0.865772		0.908035	0.732105	0.89783		0.947408
-0.256	0.98111	0.981587	0.952255		0.963303	0.770664	0.936909		0.96988	0.798621	0.91517		0.962724	0.833883	0.971861		0.966325	0.842655	0.808569		0.927514	0.730669	0.904196		0.934041	0.866846	0.94209		0.904762	0.784852	0.791968		0.92993	0.725457	0.786656		0.966184	0.821798	0.830131		0.941234	0.649273	0.905081		0.963214	0.808707	0.825497		0.950852
-0.192	0.98111	0.981587	0.952255		0.943807	0.866705	0.976341		0.966114	0.841379	0.923154		1	0.890574	0.998918		1	0.897972	0.817685		0.930631	0.721328	0.88951		0.934799	0.856604	0.964689		0.902894	0.753019	0.826506		0.941942	0.802511	0.766886		1	0.896694	0.852376		0.981391	0.701027	0.886865		0.986447	0.88154	0.853526		0.964095
-0.128	0.96222	0.968254	0.959328		1	0.946449	0.966877		0.972139	0.966897	0.94012		0.977778	0.935399	0.982684		0.968521	0.980332	0.854148		0.911925	0.838609	0.846154		0.949204	0.886253	0.993644		0.910364	0.905049	0.824096		0.945946	0.902968	0.757825		0.950725	0.979339	0.934277		1	0.792985	0.897411		0.932236	0.912934	0.873418		0.956755
-0.064	0.974026	0.991746	0.973475		0.965596	0.995925	0.968454		0.972139	0.966897	0.94012		0.954839	0.970336	0.968615		0.944363	0.995698	0.834093		0.937646	0.939284	0.862937		0.981804	0.983827	0.968927		0.878618	0.901756	0.760643		0.998999	0.922374	0.780066		0.948792	0.964876	0.83822		0.976494	0.923011	0.867689		0.96999	0.969443	0.835443		0.958609
0	0.968123	1	0.972591		0.96789	1	0.939274		0.970633	1	0.892216		0.984946	1	0.981602		0.956808	1	0.815861		0.928293	1	0.851748		0.921152	1	1		0.885154	1	0.807229		0.984985	1	0.788303		0.904348	1	0.91001		0.976494	1	0.887824		0.968054	1	0.863472		0.951407
0.064	0.931523	0.939683	0.925729		0.975917	0.924913	0.899054		1	0.988276	0.886228		0.938351	0.990112	0.941558		0.968521	0.867855	0.840474		0.890881	0.988583	0.816783		0.974981	0.987062	0.96822		0.905696	0.895719	0.756627		0.944945	0.939498	0.771005		0.925604	0.959194	0.896866		0.935357	0.882378	0.856184		0.950629	0.920469	0.885172		0.9452
0.128	0.989374	0.883175	0.881521		0.975917	0.924913	0.899054		0.964608	0.945517	0.88523		0.991398	0.93408	0.980519		0.984627	0.775661	0.821331		0.913484	0.942916	0.822378		0.913571	0.957412	0.930791		0.88422	0.818332	0.727711		0.94995	0.886986	0.802306		0.965217	0.854855	0.868554		0.923604	0.904192	0.872483		0.956438	0.858937	0.862568		0.951034
0.192	0.970484	0.925714	0.872679		0.918578	0.839348	0.87224		0.956325	0.942069	0.923154		0.949821	0.883982	0.917749		0.931186	0.716042	0.789426		0.93219	0.885833	0.834266		0.937832	0.847978	0.933616		0.868347	0.705818	0.685141		0.972973	0.826484	0.783361		0.968116	0.853306	0.847321		0.979432	0.760907	0.878236		0.9303	0.835077	0.830018		0.942965
0.256	0.970484	0.925714	0.872679		0.943807	0.788708	0.844637		0.995482	0.866207	0.863273		0.94552	0.814766	0.929654		0.948755	0.742471	0.801276		0.91894	0.812662	0.803497		0.93025	0.778437	0.89548		0.869281	0.682766	0.726104		0.991992	0.749429	0.729819		0.943961	0.768595	0.809909		0.96474	0.751069	0.864813		0.96031	0.799916	0.855335		0.948627
0.32	0.932704	0.906667	0.842617		0.965596	0.813155	0.817823		0.975904	0.777931	0.89022		0.899642	0.833223	1		0.964861	0.725261	0.782133		0.862822	0.756617	0.822378		0.946929	0.775741	0.93291		0.898226	0.692645	0.692369		0.97998	0.746005	0.749588		0.933333	0.696281	0.85541		0.943193	0.706587	0.819751		0.948693	0.789033	0.845389		0.937657
0.384	0.948052	0.897143	0.860301		0.993119	0.858556	0.80205		0.978916	0.788966	0.877246		0.922581	0.832564	0.915584		0.954612	0.765212	0.787603		0.882307	0.725999	0.800699		0.952995	0.753639	0.933616		0.873016	0.668496	0.676305		0.994995	0.729452	0.733937		0.992271	0.670971	0.808898		0.977473	0.701882	0.806328		0.918683	0.743826	0.874322		0.949085
0.448	0.946871	0.840635	0.797524		0.966743	0.898137	0.791009		0.988705	0.776552	0.871257		0.914695	0.822017	0.936147		0.949488	0.717271	0.791249		0.946999	0.727556	0.816084		0.952995	0.753639	0.933616		0.872082	0.700878	0.683534		0.950951	0.767694	0.722405		0.949758	0.702479	0.837209		0.927522	0.695038	0.825503		0.911907	0.719967	0.798373		0.939893
0.512	0.958678	0.869206	0.825818		0.963303	0.898719	0.815457		0.981928	0.777241	0.860279		0.926165	0.840475	0.959957						0.901793	0.696938	0.802797		0.960576	0.725606	0.926554		0.865546	0.671789	0.694779		0.951952	0.72774	0.7257		0.971014	0.69938	0.839232		0.938296	0.707015	0.790029		0.951597	0.720385	0.785714		0.942804
0.576	0.958678	0.853968	0.800177						0.975151	0.766897	0.857285		0.903943	0.859591	0.91342						0.908028	0.709912	0.817483		0.954511	0.702965	0.990113		0.883287	0.701427	0.677108		0.944945	0.761986	0.702636		0.918841	0.676136	0.867543		0.96474	0.723268	0.78907		0.886738	0.709502	0.835443		0.929886
0.64	0.977568	0.818413	0.870027																		0.921278	0.655942	0.795105		0.962851	0.733154	0.928672						0.977978	0.763128	0.680395						0.934378	0.715997	0.790029						0.954811
0.704																																									0.942214	0.725834	0.774688
0.768
0.832
0.896
0.96
1.024
1.088
1.152
Experiment 2
	Line scan 1			2			3			4			5			6			7			8			9			10			11			12			13			14			15			16			17
Distance from peak ACA intensity (μm)	GFP	ACA	HURP	GFP	ACA	HURP	GFP	ACA	HURP	GFP	ACA	HURP	GFP	ACA	HURP	GFP	ACA	HURP	GFP	ACA	HURP	GFP	ACA	HURP	GFP	ACA	HURP	GFP	ACA	HURP	GFP	ACA	HURP	GFP	ACA	HURP	GFP	ACA	HURP	GFP	ACA	HURP	GFP	ACA	HURP	GFP	ACA	HURP	GFP
-1.792	0	0	0	0.9733	0.6606	0.9708	0.9099	0.5892	0.8202	0	0	0	0	0	0	0	0	0	0	0	0	0	0	0	0	0	0	0	0	0	0	0	0	0	0	0	0	0	0	0	0	0	0	0	0	0	0	0	0
-1.728	0	0	0	0.9733	0.6606	0.9708	0.9099	0.5892	0.8202	0	0	0	0	0	0	0	0	0	0	0	0	0	0	0	0	0	0	0	0	0	0	0	0	0	0	0	0	0	0	0	0	0	0	0	0	0	0	0	0
-1.664	0	0	0	0.9668	0.6612	1	0.9263	0.5924	0.8567	0	0	0	0	0	0	0	0	0	0	0	0	0	0	0	0	0	0	0	0	0	0	0	0	0	0	0	0	0	0	0	0	0	0	0	0	0	0	0	0
-1.6	0	0	0	0.9864	0.6623	0.929	0.9478	0.6368	0.8391	0	0	0	0	0	0	0	0	0	0	0	0	0	0	0	0	0	0	0.9075	0.5775	1	0	0	0	0	0	0	0	0	0	0	0	0	0	0	0	0	0	0	0
-1.536	0	0	0	0.9793	0.6334	0.9283	0.9508	0.5852	0.8114	0	0	0	0	0	0	0	0	0	0	0	0	0	0	0	0.9187	0.6827	0.9812	0.9421	0.5798	0.987	0	0	0	0	0	0	0	0	0	0.8743	0.5475	0.9675	0	0	0	0	0	0	0
-1.472	0	0	0	0.9793	0.6334	0.9283	0.9308	0.6101	0.86	0	0	0	0	0	0	0	0	0	0	0	0	0	0	0	0.9153	0.677	0.9551	0.9397	0.5775	0.9725	0	0	0	0	0	0	0	0	0	0.8543	0.5688	0.9993	0	0	0	0	0	0	0
-1.408	0	0	0	0.9923	0.6387	0.9847	0.9624	0.5885	0.8884	0	0	0	0	0	0	0	0	0	0	0	0	0	0	0	0.9144	0.7054	1	0.8953	0.6098	0.9434	0	0	0	0.8902	0.5958	0.9582	0	0	0	0.8639	0.5645	0.966	0	0	0	0	0	0	0
-1.344	0	0	0	0.975	0.6582	0.9589	0.947	0.6238	0.9527	0	0	0	0	0	0	0	0	0	0	0	0	0	0	0	0.9521	0.6837	0.9478	0.9224	0.6081	0.9526	0	0	0	0.8861	0.6472	0.917	0.8761	0.6017	0.9156	0.8827	0.5743	1	0	0	0	0	0	0	0
-1.28	0	0	0	0.9893	0.6346	0.927	0.9542	0.6022	0.906	0.9575	0.5586	0.9083	0	0	0	0	0	0	0	0	0	0.9612	0.5545	0.9067	1	0.6961	0.9445	0.8953	0.5833	0.961	0.9254	0.5732	1	0.9101	0.5859	1	0.8865	0.5952	0.9432	0.898	0.5935	0.9682	0	0	0	0.9256	0.7262	0.9767	0.912
-1.216	0	0	0	0.9999	0.6984	0.8839	0.9703	0.6048	0.9845	0.9575	0.5586	0.9083	0	0	0	0	0	0	0	0	0	0.9354	0.5522	0.8898	0.9289	0.6925	0.9184	0.9467	0.5971	0.945	0.9226	0.5897	0.9397	0.9303	0.628	0.9961	0.873	0.6159	0.944	0.8731	0.5815	0.9863	0	0	0	0.9628	0.7278	1	0.912
-1.152	0	0	0	0.9999	0.6984	0.8839	0.9713	0.5996	1	0.9398	0.599	0.9058	0	0	0	0	0	0	0	0	0	0.9822	0.555	0.9522	0.9091	0.7059	0.9258	0.9547	0.6069	0.8953	0.9331	0.5654	0.9062	0.9078	0.6373	0.9826	0.8583	0.6275	0.9424	0.889	0.5831	0.9002	0	0	0	0.9866	0.7254	0.9838	0.9248
-1.088	0	0	0	0.9888	0.6594	0.8686	0.9738	0.6297	0.9838	0.9474	0.5747	0.9451	0	0	0	0	0	0	0	0	0	0.9429	0.5672	0.9406	0.8897	0.6791	0.9388	0.9579	0.6213	0.9266	0.9346	0.5864	0.9028	0.8896	0.6286	0.9492	0.8727	0.612	0.9248	0.8857	0.6264	0.9465	0.9702	0.7194	0.9958	0.937	0.7309	0.9697	0.9357
-1.024	0.9835	0.7047	0.9414	1	0.6665	0.8547	0.9738	0.6297	0.9838	0.9752	0.6042	0.9283	0.9246	0.6272	0.9444	0	0	0	0	0	0	0.923	0.5487	0.926	0.9076	0.7172	0.9152	0.9136	0.6427	0.8685	0.9429	0.5721	0.8948	0.9075	0.646	0.8938	0.8891	0.6314	0.9854	0.8815	0.5924	0.9291	0.9527	0.7242	0.9746	0.9546	0.7504	0.8978	0.9545
-0.96	0.9989	0.7167	0.9576	0.9924	0.6777	0.8666	0.9638	0.6257	0.952	0.9529	0.5955	0.9664	0.9254	0.6272	0.9784	0.9519	0.7433	0.9969	0.99	0.674	0.928	0.9515	0.5545	0.9653	0.9274	0.711	0.9356	0.8804	0.6167	0.8662	0.9432	0.6013	0.8505	0.9066	0.6609	0.8526	0.86	0.634	0.9447	0.9138	0.6034	0.9263	0.9115	0.6887	0.9746	0.9546	0.7504	0.8978	0.9446
-0.896	0.9931	0.6889	0.9737	0.9796	0.6889	0.8646	0.9902	0.6022	0.973	0.9587	0.6469	1	0.9086	0.6148	1	0.9519	0.7433	0.9969	0.99	0.674	0.928	1	0.5291	0.9622	0.8979	0.7162	0.9233	0.9136	0.6317	0.8685	0.9269	0.5842	0.8794	0.9013	0.6503	0.8314	0.9043	0.6398	0.9593	0.8908	0.6281	0.9718	1	0.6685	0.9653	0.9587	0.7761	0.8865	0.9684
-0.832	0.9822	0.6977	0.9838	0.9932	0.706	0.8441	0.9826	0.629	0.9013	0.98	0.6122	0.94	0.9237	0.6563	0.9196	0.9177	0.7316	1	0.9816	0.7268	0.942	0.9962	0.5591	1	0.9158	0.6785	0.9584	0.8911	0.6254	0.8899	0.9334	0.5803	0.8827	0.9309	0.6807	0.8018	0.9069	0.6211	0.9501	0.9052	0.5891	0.953	1	0.6685	0.9653	0.8977	0.7364	0.8851	0.9416
-0.768	0.9731	0.6755	0.9454	0.9716	0.7149	0.8753	0.9872	0.6427	0.9385	1	0.6163	0.9522	0.9044	0.6166	0.9382	0.9511	0.7557	0.9745	0.9985	0.7146	0.9079	0.9634	0.551	0.973	0.866	0.7116	0.9829	0.8687	0.6651	0.8555	0.9627	0.6251	0.9082	0.9075	0.659	0.8134	0.9419	0.6365	0.9824	0.9031	0.6418	0.8814	0.9671	0.7138	1	0.9752	0.734	0.8858	0.9308
-0.704	1	0.6895	0.9731	0.9475	0.7515	0.8122	0.9881	0.6473	0.9033	0.9797	0.678	0.9219	0.979	0.6334	0.9482	0.903	0.7295	0.9799	1	0.6965	0.9573	0.979	0.5718	0.9977	0.8791	0.693	0.9609	0.9196	0.6455	0.857	0.946	0.6113	0.9021	0.9268	0.6646	0.8604	0.9132	0.6365	0.9601	0.906	0.6341	0.914	0.9691	0.702	0.9882	0.9773	0.7317	0.852	0.9426
-0.64	0.9873	0.7117	0.9542	0.9515	0.7656	0.8686	1	0.6623	0.9236	0.9765	0.6261	0.9548	0.9137	0.6514	0.959	0.9731	0.7399	0.9683	0.9639	0.7358	0.938	0.9569	0.6087	0.9776	0.8936	0.6997	0.9731	0.9145	0.6478	0.8295	0.9707	0.6438	0.8505	0.9306	0.7142	0.7973	0.9356	0.6398	1	0.9372	0.6221	0.94	0.9671	0.6873	0.9273	0.9494	0.7715	0.8943	0.9436
-0.576	0.9928	0.7313	0.965	0.9546	0.745	0.8593	0.9916	0.6512	0.9175	0.9758	0.6122	0.9051	0.9514	0.657	0.9459	0.9511	0.7591	0.9583	0.9862	0.6933	1	0.9467	0.5873	0.9337	0.8607	0.6543	0.9519	0.9131	0.6438	0.8051	0.9389	0.6505	0.8526	0.9411	0.6894	0.7902	0.9304	0.6327	0.9708	0.9219	0.6714	0.9176	0.9712	0.7075	0.9975	0.9422	0.752	0.8696	0.9842
-0.512	0.9928	0.7313	0.965	0.9448	0.7444	0.8321	0.9685	0.6238	0.9195	0.9865	0.6509	0.9103	0.9573	0.6805	0.939	0.9307	0.7922	0.9359	0.9677	0.7023	0.982	0.9532	0.5965	0.9322	0.88	0.6667	0.9372	0.8944	0.6455	0.8433	1	0.6753	0.8251	0.9391	0.6745	0.7812	0.9273	0.6727	0.9923	0.8809	0.6808	0.8843	0.9475	0.7096	0.9772	0.9463	0.7808	0.8619	0.9515
-0.448	0.9743	0.7218	0.965	0.9432	0.791	0.7837	0.9795	0.6773	0.8857	0.971	0.6751	0.9135	0.9195	0.6936	0.9699	0.9756	0.7935	0.9205	0.8924	0.7191	0.9073	0.9451	0.615	0.9468	0.8665	0.6662	0.898	0.8411	0.6582	0.802	0.983	0.6963	0.8579	0.9016	0.7123	0.7844	0.8942	0.6675	0.9831	0.9156	0.6709	0.8879	0.9949	0.6811	0.9096	0.9484	0.7566	0.8457	0.9258
-0.384	0.9836	0.7288	0.9333	0.9618	0.8064	0.781	0.9619	0.6734	0.8884	0.9888	0.6682	0.8851	0.9153	0.67	0.9652	0.9503	0.766	0.9158	0.9439	0.7358	0.8806	0.9693	0.6657	0.926	0.8979	0.6631	0.8581	0.857	0.6513	0.802	0.9284	0.714	0.8405	0.916	0.726	0.7889	0.9112	0.6604	0.9624	0.9276	0.6764	0.8583	0.9753	0.6922	0.9569	0.9835	0.8097	0.8295	0.9723
-0.32	0.9498	0.7959	1	0.95	0.8105	0.8182	0.9619	0.6734	0.8884	0.9939	0.7092	0.8877	0.9153	0.67	0.9652	0.9291	0.7977	0.9668	0.9247	0.6997	0.9053	0.951	0.6432	0.9507	0.8974	0.6574	0.898	0.865	0.668	0.8318	0.9602	0.7239	0.8237	0.9602	0.7576	0.7999	0.9486	0.6792	0.9739	0.9171	0.6572	0.9031	0.9146	0.7451	0.9231	0.9669	0.8541	0.8351	0.9565
-0.256	0.9492	0.7864	0.9757	0.9382	0.8843	0.7989	0.986	0.693	0.9033	0.9968	0.7398	0.8903	0.9598	0.696	0.9575	0.9315	0.7956	0.9259	0.9531	0.7268	0.8292	0.9488	0.6467	0.9638	0.8941	0.6687	0.8891	0.8748	0.7078	0.8425	0.938	0.7802	0.7869	0.9857	0.8041	0.7619	0.969	0.7302	0.9164	0.9446	0.7126	0.8778	0.9558	0.75	0.9256	0.8998	0.8471	0.8837	1
-0.192	0.9347	0.8707	0.9528	0.9382	0.8843	0.7989	0.9693	0.7884	0.9277	0.9835	0.8379	0.847	1	0.7606	0.9714	0.9715	0.8513	0.9197	0.9193	0.741	0.8833	0.9456	0.7072	0.9568	0.8795	0.7157	0.8972	0.9351	0.7948	0.8188	0.9726	0.8874	0.817	1	0.8878	0.7651	0.9822	0.8109	0.9233	0.9438	0.7652	0.919	0.9722	0.8231	0.9704	1	0.9321	0.8499	0.9387
-0.128	0.9586	0.9677	0.9535	0.9332	0.9351	0.7956	0.986	0.887	0.8999	0.9749	0.9533	0.8412	0.9757	0.8524	0.9359	1	0.8087	0.9158	0.9316	0.7945	0.8659	0.9343	0.7948	0.9784	0.9439	0.8447	0.9356	0.9888	0.9072	0.8907	0.9389	0.9194	0.8157	0.9485	0.969	0.7889	0.9911	0.8444	0.9309	1	0.8162	0.893	0.9187	0.8287	0.9273	0.9277	0.9727	0.8182	0.9535
-0.064	0.9467	0.9474	0.9825	0.9214	0.9799	0.783	0.9799	0.9713	0.9256	0.9749	0.9533	0.8412	0.9346	0.9603	0.9737	0.9886	0.9924	0.9398	0.9539	0.8589	0.8873	0.9418	0.8876	0.8874	0.9182	0.9345	0.9348	1	0.977	0.8945	0.9701	0.9442	0.8036	0.9168	0.9591	0.7426	1	0.9141	0.957	0.9877	0.9424	0.8785	0.9733	0.9276	0.9375	0.9411	0.9914	0.7879	0.9575
0	0.9425	1	0.9447	0.9188	1	0.7916	0.9648	1	0.9446	0.9257	1	0.8322	0.9288	1	0.9683	0.9568	1	0.9212	0.9654	1	0.8292	0.9553	1	0.9113	0.896	1	0.929	0.9869	1	0.9151	0.98	1	0.7976	0.9303	1	0.7947	0.9514	1	0.9678	0.9449	1	0.8836	0.9589	1	0.9721	0.937	1	0.8337	0.9308
0.064	0.9154	0.969	0.9003	0.872	0.9492	0.7817	0.965	0.9216	0.9081	0.9325	0.8702	0.8451	0.9455	0.9311	0.9482	0.9185	0.9952	0.9514	0.9493	0.9678	0.8446	0.9548	0.9752	0.9437	0.8699	0.9706	0.9315	0.9327	0.9873	0.8639	0.9547	0.9315	0.7808	0.9247	0.8884	0.7606	0.9503	0.9787	0.9348	0.9183	0.9803	0.8525	0.9712	0.9728	0.9222	0.9143	0.9189	0.8006	0.9169
0.128	0.9211	0.9271	0.9131	0.872	0.9492	0.7817	0.9718	0.8406	0.8972	0.9341	0.809	0.8431	0.9338	0.8189	0.9745	0.9332	0.9401	0.9027	0.9723	0.8744	0.8539	0.9322	0.9366	0.9483	0.8462	0.8803	0.9127	0.8799	0.8865	0.8624	0.947	0.8581	0.7875	0.8966	0.8072	0.7362	0.9394	0.9858	0.9087	0.9126	0.9342	0.8467	0.9537	0.9046	0.9265	0.9143	0.9189	0.8006	0.9327
0.192	0.9189	0.9145	0.9218	0.9001	0.7987	0.7744	0.9675	0.7734	0.8945	0.936	0.7167	0.8005	0.9137	0.7637	0.9467	0.9112	0.861	0.9305	0.9531	0.8254	0.7892	0.9246	0.8646	0.946	0.8452	0.757	0.894	0.8533	0.8582	0.8211	0.9682	0.7786	0.7735	0.8908	0.7805	0.7407	0.9342	0.9058	0.9309	0.9246	0.8738	0.8597	0.9619	0.812	0.9484	0.9587	0.8744	0.7386	0.9911
0.256	0.8939	0.8264	0.8902	0.8839	0.7916	0.7744	0.9649	0.7603	0.8783	0.9406	0.7242	0.807	0.9598	0.75	0.9459	0.947	0.8142	0.9127	0.9523	0.8022	0.7859	0.9117	0.7735	0.9615	0.8471	0.6945	0.9184	0.8706	0.7695	0.8242	0.9596	0.8051	0.7681	0.8902	0.7719	0.7355	0.9543	0.8418	0.8972	0.9291	0.8437	0.8554	0.9712	0.7702	0.9155	0.9897	0.8471	0.7956	0.9308
0.32	0.8945	0.82	0.8477	0.9073	0.807	0.7936	0.9595	0.7688	0.8492	0.9328	0.7501	0.7973	0.9078	0.7041	0.9699	0	0	0	0.9347	0.7809	0.7852	0.9214	0.7372	0.879	0.8399	0.7162	0.9152	0.8603	0.7798	0.8165	0.9587	0.7852	0.7493	0.906	0.8072	0.7233	0.9325	0.8244	0.9071	0.898	0.7921	0.8294	0.9712	0.7702	0.9155	0.9205	0.8448	0.7618	0.9545
0.384	0.9048	0.7643	0.8801	0	0	0	0	0	0	0.9511	0.7853	0.7999	0	0	0	0	0	0	0.9009	0.8074	0.8099	0.8842	0.6945	0.8658	0.8791	0.7116	0.9038	0	0	0	0.9864	0.8051	0.752	0.9344	0.8227	0.7323	0.9457	0.8012	0.8933	0.9405	0.8003	0.7968	0.9969	0.7834	0.9501	0	0	0	0.9407
0.448	0.8824	0.7966	0.8612	0	0	0	0	0	0	0	0	0	0	0	0	0	0	0	0	0	0	0	0	0	0	0	0	0	0	0	0	0	0	0	0	0	0.9402	0.8173	0.914	0.93	0.7987	0.8315	0.9239	0.8134	0.9434	0	0	0	0
0.512	0	0	0	0	0	0	0	0	0	0	0	0	0	0	0	0	0	0	0	0	0	0	0	0	0	0	0	0	0	0	0	0	0	0	0	0	0	0	0	0	0	0	0	0	0	0	0	0	0
0.576	0	0	0	0	0	0	0	0	0	0	0	0	0	0	0	0	0	0	0	0	0	0	0	0	0	0	0	0	0	0	0	0	0	0	0	0	0	0	0	0	0	0	0	0	0	0	0	0	0
0.64	0	0	0	0	0	0	0	0	0	0	0	0	0	0	0	0	0	0	0	0	0	0	0	0	0	0	0	0	0	0	0	0	0	0	0	0	0	0	0	0	0	0	0	0	0	0	0	0	0
0.704	0	0	0	0	0	0	0	0	0	0	0	0	0	0	0	0	0	0	0	0	0	0	0	0	0	0	0	0	0	0	0	0	0	0	0	0	0	0	0	0	0	0	0	0	0	0	0	0	0
0.768	0	0	0	0	0	0	0	0	0	0	0	0	0	0	0	0	0	0	0	0	0	0	0	0	0	0	0	0	0	0	0	0	0	0	0	0	0	0	0	0	0	0	0	0	0	0	0	0	0
0.832	0	0	0	0	0	0	0	0	0	0	0	0	0	0	0	0	0	0	0	0	0	0	0	0	0	0	0	0	0	0	0	0	0	0	0	0	0	0	0	0	0	0	0	0	0	0	0	0	0
0.896	0	0	0	0	0	0	0	0	0	0	0	0	0	0	0	0	0	0	0	0	0	0	0	0	0	0	0	0	0	0	0	0	0	0	0	0	0	0	0	0	0	0	0	0	0	0	0	0	0
0.96	0	0	0	0	0	0	0	0	0	0	0	0	0	0	0	0	0	0	0	0	0	0	0	0	0	0	0	0	0	0	0	0	0	0	0	0	0	0	0	0	0	0	0	0	0	0	0	0	0
1.024	0	0	0	0	0	0	0	0	0	0	0	0	0	0	0	0	0	0	0	0	0	0	0	0	0	0	0	0	0	0	0	0	0	0	0	0	0	0	0	0	0	0	0	0	0	0	0	0	0
[truncated: 74 more columns]

## Sheet: GFP-sNL1 (HURP&18A siRNA)
Experiment 1
	Line scan 1			2			3			4			5			6			7			8			9			10			11			12			13			14			AVERAGE			STANDARD DEVIATION
Distance from peak ACA intensity (μm)	GFP	ACA		GFP	ACA		GFP	ACA		GFP	ACA		GFP	ACA		GFP	ACA		GFP	ACA		GFP	ACA		GFP	ACA		GFP	ACA		GFP	ACA		GFP	ACA		GFP	ACA		GFP	ACA		GFP	ACA		GFP	ACA
-1.216
-1.152
-1.088
-1.024
-0.96
-0.896
-0.832	0.889853	0.750354																	0.883766	0.806115
-0.768	0.886055	0.783593		0.91195	0.636849														0.865034	0.774049																							0.88768	0.731497		0.0331747	0.0970151
-0.704	0.897992	0.816124		0.92942	0.663551					0.915769	0.725981		0.905263	0.836053		0.942722	0.895735		0.935639	0.795675								0.870192	0.782473														0.913857	0.787942		0.0264274	0.0814905
-0.64	0.932718	0.780764		0.931516	0.697597		0.887421	0.866624		0.915769	0.725981		0.925506	0.813798		0.942722	0.895735		0.888569	0.766592								0.870192	0.782473					0.929284	0.835131								0.913744	0.796077		0.0259614	0.0680175
-0.576	0.895279	0.778642		0.91754	0.672897		0.887421	0.866624		0.905003	0.763502		0.94251	0.791543		0.947439	0.865719		0.914025	0.768084								0.883242	0.784038					0.929284	0.835131								0.913527	0.791798		0.0235567	0.0637854
-0.512	0.883342	0.768034		0.964361	0.666889		0.857233	0.83183		0.913236	0.773735		0.919838	0.856825		0.99124	0.838863		0.914025	0.768084					0.966426	0.690966		0.891827	0.760563		0.92292	0.868895		0.952251	0.880842		0.9375	0.799877					0.926183	0.792117		0.0377505	0.0703908
-0.448	0.934889	0.848656		0.957372	0.701602		0.888679	0.850515		0.922103	0.759522		0.950607	0.843472		1	0.839389		0.954851	0.775541		0.965966	0.780314		0.970558	0.729595		0.898695	0.752739		0.92292	0.868895		0.951949	0.866975		0.926786	0.791283		0.909402	0.739669		0.939627	0.796298		0.0316866	0.0560216
-0.384	0.907759	0.809052		0.909154	0.726302		0.907547	0.873711		0.922103	0.759522		0.965182	0.872404		0.940027	0.787783		0.930355	0.789709		0.937938	0.772468		0.952479	0.748287		0.89114	0.766302		0.925775	0.886247		0.916893	0.870056		0.940179	0.772253		0.91453	0.762102		0.92579	0.799728		0.0200974	0.0556091
-0.32	0.944655	0.811881		0.9413	0.749666		0.957862	0.874356		0.932236	0.793064		0.979757	0.922107		0.963612	0.820958		0.935639	0.837435		0.947447	0.785307		0.945764	0.795639		0.913462	0.763172		0.964519	0.888817		0.959202	0.86338		0.955357	0.750767		0.935897	0.734357		0.948336	0.813636		0.0172913	0.0595996
-0.256	0.95822	0.838048		0.913347	0.771028		0.957862	0.874356		0.9943	0.808414		0.981377	0.948813		0.994609	0.820432		0.962536	0.876212		0.962963	0.773894		1	0.800623		0.958791	0.824726		0.964519	0.888817		1	0.867488		0.966964	0.773481		0.94188	0.734947		0.968383	0.828663		0.0250569	0.060092
-0.192	0.989148	0.889675		0.955975	0.851135		0.97044	0.941366		1	0.909039		1	0.999258		0.986523	0.884676		1	0.887397		0.986486	0.776748		0.944215	0.855452		0.98283	0.873239		1	0.942159		0.996676	0.892655		0.992857	0.796808		0.959829	0.802243		0.983213	0.878704		0.019134	0.0632338
-0.128	1	0.91867		0.974144	0.884513		1	0.935567		0.91387	0.949972		0.958704	0.998516		0.931941	0.95366		0.907781	0.987323		0.965465	0.901569		0.991736	0.902181		0.974931	0.90506		0.955954	0.99036		0.967362	0.989214		1	0.843462		0.98547	0.822314		0.96624	0.927313		0.0300702	0.0573185
-0.064	0.963646	0.955446		1	0.944593		0.91195	0.983892		0.91387	0.949972		0.915789	0.997774		0.897574	0.963665		0.915946	0.97912		0.965465	0.901569		0.90031	0.971963		1	0.995305		0.955954	0.99036		0.942883	0.958398		0.957143	0.926949		1	0.908501		0.945752	0.959108		0.0384772	0.0318622
0	0.950624	1		0.965059	1		0.883648	1		0.930969	1		0.91336	1		0.909704	1		0.936119	1		1	1		0.892045	1		0.930632	1		0.906199	1		0.912058	1		0.95	1		0.951282	1		0.930836	1		0.0318604	0
0.064	0.934346	0.952617		0.92942	0.929239		0.857862	0.910438		0.941102	0.978397		0.945749	0.949555		0.878706	0.92891		0.892411	0.996271		0.966466	0.928673		0.902893	0.938318		0.897321	0.989567		0.846656	0.90874		0.864309	0.959938		0.905357	0.990178		0.954701	0.982881		0.908379	0.953123		0.0387071	0.0315066
0.128	0.909387	0.955446		0.936408	0.929239		0.857862	0.910438		0.920836	0.868107		0.897976	0.924332		0.850404	0.903107		0.920269	0.90082		0.946947	0.920114		0.892562	0.901558		0.900412	0.896192		0.846656	0.90874		0.858265	0.945557		0.934821	0.947207		0.908547	0.903778		0.898668	0.915331		0.0347395	0.0213116
0.192	0.900705	0.94413		0.899371	0.908545		0.823899	0.79768		0.920836	0.868107		0.899595	0.899852		0.826146	0.835703		0.881844	0.841163		0.914414	0.868046		0.919938	0.836137		0.861951	0.894627		0.80832	0.86054		0.812934	0.909091		0.895536	0.85267		0.895726	0.829988		0.875801	0.867591		0.042053	0.0341559
0.256	0.881172	0.90099		0.948987	0.919226		0.835849	0.822809		0.958201	0.773167		0.922267	0.912463		0.829515	0.766719		0.95245	0.841909		0.958959	0.793866		0.866736	0.838006		0.865385	0.912363		0.825856	0.82455		0.870354	0.888546		0.90625	0.769797		0.884615	0.782763		0.893328	0.839084		0.0501019	0.0573099
0.32	0.906674	0.840877		0.943396	0.933244		0.820126	0.742268		0.907536	0.811825		0.923887	0.901335		0.790431	0.748289		0.95245	0.841909		0.958959	0.793866		0.88688	0.863551		0.814904	0.943662		0.825856	0.82455		0.832578	0.830508		0.925	0.713935		0.890598	0.700708		0.884234	0.820752		0.0586764	0.0788704
0.384	0.862724	0.853607		0.967855	0.905207		0.842138	0.758376		0.867004	0.800455		0.944939	0.877596		0.824124	0.691943		0.93708	0.812081		0.936436	0.774608		0.88688	0.880374					0.802202	0.787918		0.825325	0.834104		0.935714	0.6814		0.897436	0.697166		0.886912	0.796526		0.05612	0.0756104
0.448	0.875746	0.88331		0.956674	0.925234								0.91498	0.906528		0.820081	0.71722		0.915946	0.860552		0.973974	0.793866		0.87345	0.937695											0.923214	0.694291		0.894017	0.672373		0.905342	0.82123		0.0480703	0.108601
0.512													0.933603	0.859792		0.797844	0.733544		0.907781	0.835943		0.939439	0.815264														0.897321	0.666667		0.879487	0.68595		0.892579	0.766193		0.0515338	0.0817853
0.576													0.969231	0.885757		0.829515	0.756714					0.938438	0.813124																	0.866667	0.677686		0.900963	0.78332		0.0641508	0.0880303
0.64													0.951417	0.902819		0.809299	0.713533																										0.880358	0.808176		0.100492	0.133845
0.704													0.926316	0.856825
0.768
0.832
Experiment 2
	Line scan 1		2		3		4		5		6		7		8		9		10		11		12		13		14		15		16		17		18		19		20		21		22		23		24		25
Distance from peak ACA intensity (μm)	GFP	ACA	GFP	ACA	GFP	ACA	GFP	ACA	GFP	ACA	GFP	ACA	GFP	ACA	GFP	ACA	GFP	ACA	GFP	ACA	GFP	ACA	GFP	ACA	GFP	ACA	GFP	ACA	GFP	ACA	GFP	ACA	GFP	ACA	GFP	ACA	GFP	ACA	GFP	ACA	GFP	ACA	GFP	ACA	GFP	ACA	GFP	ACA	GFP
-1.216	0	0	0	0	0	0	0	0	0	0	0	0	0	0	0	0	0	0	0	0	0	0	0	0	0	0	0	0	0	0	0	0	0.8888	0.6871	0	0	0	0	0	0	0	0	0	0	0	0	0	0	0
-1.152	0	0	0	0	0	0	0	0	0	0	0	0	0	0	0	0	0	0	0	0	0	0	0.882	0.7286	0	0	0	0	0	0	0	0	0.8888	0.6871	0	0	0	0	0	0	0	0	0	0	0	0	0	0	0
-1.088	0	0	0	0	0	0	0	0	0	0	0	0	0	0	0.9356	0.6615	0	0	0	0	0	0	0.9273	0.7647	0.857	0.627	0	0	0	0	0	0	0.8961	0.6674	0	0	0	0	0	0	0	0	0	0	0	0	0	0	0
-1.024	0.9141	0.7879	0	0	0	0	0	0	0	0	0	0	0	0	0.9356	0.6615	0	0	0	0	0	0	0.8973	0.7455	0.8641	0.642	0.8536	0.6863	0	0	0	0	0.8816	0.6599	0	0	0	0	0	0	0	0	0	0	0	0	0	0	0
-0.96	0.9482	0.7626	0	0	0	0	0	0	0.8909	0.6999	0	0	0	0	0.9144	0.7413	0	0	0.8501	0.6918	0.9028	0.7409	0.9322	0.7744	0.9002	0.6592	0.8421	0.6981	0	0	0	0	0.924	0.6397	0	0	0	0	0	0	0	0	0	0	0	0	0	0	0
-0.896	0.9182	0.8092	0.8837	0.7868	0.8574	0.6855	0	0	0.8909	0.6999	0	0	0	0	0.9336	0.7517	0	0	0.8599	0.7038	0.9028	0.7409	0.9083	0.7184	0.9009	0.6391	0.8169	0.642	0	0	0.8033	0.5624	0.8972	0.6786	0.9241	0.7251	0	0	0	0	0	0	0.819	0.748	0	0	0	0	0.9405
-0.832	0.9306	0.7713	0.8709	0.7686	0.9204	0.7267	0.9424	0.5716	0.9	0.7325	0.8947	0.7641	0	0	0.9159	0.783	0	0	0.898	0.7337	0.898	0.7718	0.8955	0.7365	0.8592	0.6506	0.8325	0.6757	0	0	0.8541	0.6006	0.9039	0.6594	0.9417	0.7399	0.9647	0.775	0	0	0	0	0.819	0.748	0.9	0.8787	0	0	0.9051
-0.768	0.9317	0.7894	0.8965	0.7954	0.8514	0.7047	0.8789	0.5791	0.9076	0.7526	0.9133	0.8258	0.9274	0.6923	0.8962	0.7741	0.952	0.7387	0.8628	0.718	0.8485	0.7491	0.8857	0.7762	0.8924	0.6477	0.8189	0.6375	0	0	0.8242	0.6051	0.8872	0.645	0.9156	0.7273	0.9827	0.7235	0.8647	0.7168	0	0	0.8625	0.7606	0.9	0.8787	0.942	0.5973	0.9367
-0.704	0.9607	0.7642	0.8741	0.8031	0.8776	0.7111	0.934	0.5845	0.9067	0.7788	0.8766	0.8089	0.9274	0.6923	0.9356	0.7454	0.9566	0.7072	0.8836	0.7046	0.9131	0.7519	0.9438	0.7816	0.8726	0.6575	0.8516	0.6336	0	0	0.8312	0.5743	0.8905	0.6642	0.9117	0.7311	0.9416	0.7399	0.8647	0.7168	0.8895	0.8292	0.8648	0.7454	0.9192	0.8558	0.9479	0.5985	0.9073
-0.64	0.9482	0.7926	0.921	0.783	0.8499	0.6983	0.9507	0.5872	0.9622	0.7959	0.889	0.8202	0.9195	0.6854	0.9193	0.7548	0.8938	0.6571	0.9038	0.7273	0.9053	0.7656	0.8588	0.7726	0.8804	0.6586	0.8639	0.6274	0	0	0.7893	0.608	0.9441	0.6684	0.949	0.7317	0.9375	0.7229	0.9205	0.69	0.9244	0.8203	0.8319	0.7323	0.9312	0.8569	0.9673	0.6299	0.9356
-0.576	0.9451	0.8076	0.8613	0.7562	0.8634	0.7401	0.9156	0.6055	0.933	0.7743	0.8628	0.7966	0.9302	0.7242	0.9218	0.7094	0.9351	0.681	0.8611	0.7173	0.9252	0.7587	0.9028	0.7377	0.9087	0.6483	0.8625	0.642	0	0	0.7874	0.611	0.9251	0.6738	0.927	0.762	0.9705	0.7106	0.9297	0.7627	0.9452	0.8381	0.8486	0.779	0.9297	0.8491	0.9544	0.6252	0.892
-0.512	0.9451	0.8076	0.9168	0.7859	0.8889	0.732	0.9683	0.6184	0.9502	0.8321	0.9095	0.8178	0.9405	0.7142	0.8726	0.7162	0.9464	0.7096	0.9078	0.7358	0.8865	0.7491	0.9169	0.7347	0.9144	0.6632	0.8645	0.6246	0	0	0.8204	0.6036	0.9168	0.6653	0.9394	0.7366	0.9491	0.6971	0.9372	0.7303	0.9254	0.7987	0.8458	0.779	0.8874	0.81	0.9648	0.6726	0.9209
-0.448	0.9627	0.832	0.9008	0.7954	0.8544	0.7279	0.9632	0.6179	0.9378	0.7833	0.8485	0.8686	0.9744	0.7336	0.9046	0.6901	0.9265	0.7549	0.8847	0.7358	0.9215	0.7553	0.8833	0.7666	0.8846	0.6707	0.8489	0.6055	0	0	0.8077	0.6809	0.8933	0.67	0.9009	0.7245	0.9364	0.7545	0.9184	0.7672	0.9452	0.8569	0.8583	0.7601	0.8994	0.7882	0.9628	0.6756	0.9389
-0.384	0.9317	0.8446	0.8997	0.8403	0.9002	0.6861	0.9465	0.6346	0.9359	0.8245	0.869	0.8211	0.9581	0.743	0.9247	0.6651	0.952	0.7539	0.8755	0.7394	0.8902	0.7683	0.915	0.7641	0.8514	0.6833	0.8359	0.6302	0	0	0.8699	0.6809	0.9441	0.6802	0.9677	0.73	0.9786	0.7335	0.9409	0.7594	0.9506	0.8419	0.8991	0.747	0.8802	0.8127	0.9628	0.7082	0.9291
-0.32	0.9493	0.8699	0.921	0.8059	0.9084	0.7384	0.9198	0.6313	0.9727	0.8522	0.9	0.8239	0.9749	0.7649	0.9459	0.6969	0.9535	0.7754	0.9153	0.7386	0.927	0.7786	0.882	0.7641	0.9087	0.6678	0.9095	0.6296	0	0	0.8484	0.671	0.9458	0.6967	0.9864	0.7163	0.9589	0.7358	0.9431	0.7292	0.9583	0.8652	0.8801	0.8026	0.8838	0.8038	0.9663	0.7242	0.9471
-0.256	0.9514	0.9133	0.9232	0.8203	0.8881	0.764	0.9357	0.6588	0.9579	0.905	0.9123	0.8583	1	0.8293	0.9051	0.6901	0.9484	0.7759	0.883	0.7656	0.9264	0.8149	0.8686	0.7894	0.9257	0.6954	0.9272	0.6863	0	0	0.9562	0.7185	0.9609	0.7461	0.9949	0.7526	1	0.7786	0.92	0.7538	0.9767	0.8991	0.9375	0.852	0.9234	0.8334	1	0.8286	0.9842
-0.192	1	0.9614	1	0.9474	0.9512	0.8122	1	0.7164	0.99	0.8924	0.9762	0.863	1	0.8293	0.9784	0.748	0.9418	0.836	0.9793	0.8217	0.9572	0.8444	0.9059	0.7918	0.983	0.7891	0.9469	0.7649	0	0	0.9943	0.776	0.9458	0.7994	1	0.8838	1	0.7786	0.9501	0.7499	0.9767	0.8991	0.9153	0.8467	0.9052	0.8513	0.9752	0.8921	1
-0.128	0.8892	0.9795	0.9797	0.892	1	0.9163	0.9641	0.7772	1	0.9804	1	0.9167	0.9758	0.9293	0.9685	0.8451	0.9883	0.9018	0.9919	0.8651	1	0.8993	0.9658	0.852	1	0.9552	1	0.8788	0	0	1	0.8751	1	0.8973	0.9847	0.9477	0.9896	0.9004	0.978	0.8226	1	0.9368	0.9634	0.9129	0.9271	0.9039	0.939	0.9365	0.9755
-0.064	0.8892	0.9795	0.9413	0.9809	0.9392	0.9826	0.9549	0.9101	0.9756	0.996	0.979	0.9868	0.9516	0.9619	1	0.9452	0.9791	0.9881	1	0.9759	0.9228	0.9527	0.9536	0.9874	0.9186	0.9989	0.9333	0.9759	0	0	0.9607	0.894	0.9659	0.9995	0.9485	0.9537	0.985	0.9619	1	0.8993	0.9632	0.9673	1	0.9449	0.964	0.9581	0.9564	0.9804	0.9716
0	0.8955	1	0.9136	1	0.8769	1	0.9507	1	0.8885	1	0.9728	1	0.9893	1	0.9956	1	0.928	1	0.9643	1	0.8992	1	1	1	0.92	1	0.8945	1	0.8758	1	0.9086	1	0.9469	1	0.9791	1	0.9416	1	0.9807	1	0.9171	1	0.9477	1	0.9515	1	0.9311	1	0.94
0.064	0.9193	0.959	0.9189	0.9646	0.8904	0.9733	0.9198	0.9957	0.8846	0.9482	0.9609	0.9765	0.8842	0.9631	0.9075	0.9927	1	0.9609	0.8824	0.9865	0.9234	0.9664	0.9682	0.9994	0.8542	0.9397	0.8693	0.9259	0.8831	0.9455	0.861	0.9475	0.9497	0.8803	0.957	0.9135	0.9462	0.9701	0.9608	0.9608	0.8968	0.964	0.9181	0.9832	1	0.9899	0.939	0.9466	0.9378
0.128	0.8903	0.8825	0.8815	0.9426	0.8799	0.9244	0.9098	0.9709	0.888	0.9809	0.9405	0.9383	0.8893	0.9525	0.9051	0.8925	0.9454	0.8283	0.8847	0.951	0.8944	0.9568	0.9212	0.9771	0.8981	0.8816	0.8428	0.7868	0.8568	0.9363	0.8027	0.8603	0.9307	0.7637	0.9253	0.8926	0.9393	0.8875	0.9533	0.9306	0.9118	0.9201	0.9199	0.9291	0.9578	0.9743	0.9891	0.9093	0.9013
0.192	0.8944	0.8659	0.8751	0.9446	0.9069	0.8233	0.8814	0.8843	0.9019	0.9432	0.9014	0.8461	0.9154	0.8893	0.9115	0.8112	0.9469	0.7773	0.8905	0.907	0.8926	0.8753	0.89	0.9717	0.8868	0.7879	0.8489	0.706	0.8568	0.845	0.8433	0.781	0.9251	0.71	0.9054	0.7978	0.937	0.8213	0.9474	0.8036	0.9006	0.8952	0.8944	0.8798	0.9385	0.8798	0.995	0.8416	0.9138
0.256	0.8965	0.7666	0.9082	0.8843	0.8679	0.7779	0.9215	0.7917	0	0	0.8733	0.7853	0.9261	0.8568	0.9252	0.7564	0.9591	0.7773	0.8674	0.8338	0.8872	0.8643	0.8949	0.9122	0.8875	0.7414	0.8543	0.7127	0.8861	0.7939	0.8096	0.724	0.9089	0.6695	0.8935	0.8105	0.9109	0.7938	0.9393	0.765	0	0	0	0	0.8973	0.8502	0	0	0.9144
0.32	0.8644	0.7973	0.9136	0.8815	0.8544	0.7471	0.9056	0.7573	0	0	0.9023	0.7787	0	0	0	0	0	0	0.8749	0.8061	0.8914	0.8417	0.901	0.8875	0.811	0.7	0.84	0.6874	0.8861	0.7939	0.7976	0.6561	0.9	0.67	0	0	0.9399	0.7961	0.8861	0.7163	0	0	0	0	0	0	0	0	0
0.384	0	0	0.921	0.8375	0	0	0.9265	0.7573	0	0	0	0	0	0	0	0	0	0	0	0	0	0	0	0	0	0	0	0	0.8619	0.8175	0.8027	0.8603	0.9078	0.6583	0	0	0.9364	0.7651	0.9039	0.6777	0	0	0	0	0	0	0	0	0
0.448	0	0	0.8976	0.8968	0	0	0.9173	0.7449	0	0	0	0	0	0	0	0	0	0	0	0	0	0	0	0	0	0	0	0	0.8963	0.7859	0.8433	0.781	0	0	0	0	0	0	0	0	0	0	0	0	0	0	0	0	0
0.512	0	0	0	0	0	0	0	0	0	0	0	0	0	0	0	0	0	0	0	0	0	0	0	0	0	0	0	0	0.897	0.721	0.8096	0.724	0	0	0	0	0	0	0	0	0	0	0	0	0	0	0	0	0
0.576	0	0	0	0	0	0	0	0	0	0	0	0	0	0	0	0	0	0	0	0	0	0	0	0	0	0	0	0	0.859	0.7382	0.7976	0.6561	0	0	0	0	0	0	0	0	0	0	0	0	0	0	0	0	0
0.64	0	0	0	0	0	0	0	0	0	0	0	0	0	0	0	0	0	0	0	0	0	0	0	0	0	0	0	0	0.859	0.7382	0	0	0	0	0	0	0	0	0	0	0	0	0	0	0	0	0	0	0
0.704	0	0	0	0	0	0	0	0	0	0	0	0	0	0	0	0	0	0	0	0	0	0	0	0	0	0	0	0	0.8598	0.7365	0	0	0	0	0	0	0	0	0	0	0	0	0	0	0	0	0	0	0
0.768	0	0	0	0	0	0	0	0	0	0	0	0	0	0	0	0	0	0	0	0	0	0	0	0	0	0	0	0	0.8831	0.7291	0	0	0	0	0	0	0	0	0	0	0	0	0	0	0	0	0	0	0
0.832	0	0	0	0	0	0	0	0	0	0	0	0	0	0	0	0	0	0	0	0	0	0	0	0	0	0	0	0	0.8466	0.6906	0	0	0	0	0	0	0	0	0	0	0	0	0	0	0	0	0	0	0
0.896	0	0	0	0	0	0	0	0	0	0	0	0	0	0	0	0	0	0	0	0	0	0	0	0	0	0	0	0	0.8999	0.717	0	0	0	0	0	0	0	0	0	0	0	0	0	0	0	0	0	0	0
0.96	0	0	0	0	0	0	0	0	0	0	0	0	0	0	0	0	0	0	0	0	0	0	0	0	0	0	0	0	0.9211	0.7583	0	0	0	0	0	0	0	0	0	0	0	0	0	0	0	0	0	0	0
1.024	0	0	0	0	0	0	0	0	0	0	0	0	0	0	0	0	0	0	0	0	0	0	0	0	0	0	0	0	0.9058	0.7865	0	0	0	0	0	0	0	0	0	0	0	0	0	0	0	0	0	0	0
1.088	0	0	0	0	0	0	0	0	0	0	0	0	0	0	0	0	0	0	0	0	0	0	0	0	0	0	0	0	0.9606	0.8513	0	0	0	0	0	0	0	0	0	0	0	0	0	0	0	0	0	0	0
1.152	0	0	0	0	0	0	0	0	0	0	0	0	0	0	0	0	0	0	0	0	0	0	0	0	0	0	0	0	0.9861	0.8617	0	0	0	0	0	0	0	0	0	0	0	0	0	0	0	0	0	0	0
1.216	0	0	0	0	0	0	0	0	0	0	0	0	0	0	0	0	0	0	0	0	0	0	0	0	0	0	0	0	1	0.9093	0	0	0	0	0	0	0	0	0	0	0	0	0	0	0	0	0	0	0
1.28	0	0	0	0	0	0	0	0	0	0	0	0	0	0	0	0	0	0	0	0	0	0	0	0	0	0	0	0	0.9445	0.8967	0	0	0	0	0	0	0	0	0	0	0	0	0	0	0	0	0	0	0
1.344	0	0	0	0	0	0	0	0	0	0	0	0	0	0	0	0	0	0	0	0	0	0	0	0	0	0	0	0	0.916	0.8485	0	0	0	0	0	0	0	0	0	0	0	0	0	0	0	0	0	0	0
1.408	0	0	0	0	0	0	0	0	0	0	0	0	0	0	0	0	0	0	0	0	0	0	0	0	0	0	0	0	0.905	0.7824	0	0	0	0	0	0	0	0	0	0	0	0	0	0	0	0	0	0	0
1.472	0	0	0	0	0	0	0	0	0	0	0	0	0	0	0	0	0	0	0	0	0	0	0	0	0	0	0	0	0.9262	0.7405	0	0	0	0	0	0	0	0	0	0	0	0	0	0	0	0	0	0	0
1.536	0	0	0	0	0	0	0	0	0	0	0	0	0	0	0	0	0	0	0	0	0	0	0	0	0	0	0	0	0.9109	0.7187	0	0	0	0	0	0	0	0	0	0	0	0	0	0	0	0	0	0	0
1.6	0	0	0	0	0	0	0	0	0	0	0	0	0	0	0	0	0	0	0	0	0	0	0	0	0	0	0	0	0	0	0	0	0	0	0	0	0	0	0	0	0	0	0	0	0	0	0	0	0
[truncated: 13 more columns]

## Sheet: mCh-WT (alone)
	*HEC1 used as kinetochore marker in mCh tagged KIF18A experiments
Experiment 1
	Line scan 1			2			3			4			5			6			7			8				AVERAGE			STANDARD DEVIATION
Distance from peak ACA intensity (μm)	mCherry	HEC1		mCherry	HEC1		mCherry	HEC1		mCherry	HEC1		mCherry	HEC1		mCherry	HEC1		mCherry	HEC1		mCherry	HEC1			mCherry	HEC1		mCherry	HEC1
-2.048
-1.984
-1.92
-1.856																0.849765	0.551297
-1.792																0.868545	0.567665
-1.728																0.865023	0.554491
-1.664																0.848592	0.560878
-1.6				0.798978	0.669011											0.901408	0.563273									0.850193	0.616142		0.0724294	0.0747676
-1.536				0.798978	0.669011											0.903756	0.582834		0.979328	0.733041						0.894021	0.661629		0.0905684	0.0753747
-1.472	0.879747	0.677677		0.787053	0.663385											0.839202	0.578443		0.979328	0.733041						0.871332	0.663136		0.0813824	0.0639558
-1.408	0.879747	0.677677		0.810903	0.638068					0.95182	0.661117					0.90493	0.56487		0.919897	0.754514		0.923367	0.664743			0.898444	0.660165		0.0489601	0.0613183
-1.344	0.870705	0.653703		0.795571	0.674168					0.938972	0.662191					0.90493	0.56487		0.932817	0.7306		0.923367	0.664743			0.894394	0.658379		0.0542976	0.0534528
-1.28	0.886076	0.686201		0.835605	0.646976					0.936831	0.660043					0.870892	0.612375		0.943152	0.729136		0.904523	0.651756			0.89618	0.664415		0.0408398	0.0396361
-1.216	0.829114	0.656899		0.837308	0.64135					0.940043	0.663802					0.913146	0.596407		0.943152	0.736945		0.865578	0.675806			0.888057	0.661868		0.050838	0.0459681
-1.152	0.89783	0.698988		0.802385	0.622128		0.891807	0.737213		0.897216	0.664876					0.906103	0.638723		0.917313	0.744265		0.942211	0.683502			0.893552	0.684242		0.0436578	0.0464254
-1.088	0.818264	0.699521		0.811755	0.683075		0.902311	0.730159		0.917559	0.662728					0.86385	0.637525		0.885013	0.737433		0.932161	0.701299			0.875845	0.693106		0.047016	0.0354935
-1.024	0.894213	0.706979		0.839012	0.67323		0.87605	0.736626		0.938972	0.66058		0.942029	0.795724		0.89554	0.646307		0.96124	0.722792		0.883166	0.740741			0.903778	0.710372		0.0406226	0.0493173
-0.96	0.821881	0.691529		0.824532	0.653071		0.927521	0.737801		0.938972	0.672932		0.915273	0.812352		0.862676	0.637126		0.935401	0.755002		0.91206	0.730159			0.892289	0.711246		0.0487321	0.0584743
-0.896	0.879747	0.720298		0.817717	0.664323		0.927521	0.737801		0.875803	0.699248		0.925307	0.761876		0.883803	0.650299		0.932817	0.738897		0.91206	0.730159			0.894347	0.712863		0.038532	0.0387523
-0.832	0.846293	0.720298		0.864566	0.667604		0.906513	0.757202		0.945396	0.688507		0.958751	0.761283		0.883803	0.650299		0.962532	0.730112		0.933417	0.733045			0.912659	0.713544		0.0442434	0.0407476
-0.768	0.905063	0.697389		0.836457	0.675574		0.903361	0.73251		0.913276	0.686359		0.914158	0.771378		0.880282	0.687824		0.928941	0.70571		0.907035	0.736412			0.898572	0.711645		0.0285631	0.0324326
-0.704	0.846293	0.728823		0.835605	0.681669		0.903361	0.73251		0.943255	0.701933		0.9699	0.733373		0.842723	0.69022		0.912145	0.728648		0.904523	0.739298			0.894725	0.717059		0.0493174	0.0222766
-0.64	0.920434	0.741076		0.852641	0.666667		0.922269	0.738389		0.941113	0.70623		0.914158	0.735154		0.913146	0.726547		0.891473	0.740361		0.896985	0.740741			0.906527	0.724396		0.0266214	0.0261292
-0.576	0.886076	0.712307		0.874787	0.698078		0.879202	0.761905		0.936831	0.734157		0.952062	0.748812		0.940141	0.749301		0.897933	0.75549		0.893216	0.751804			0.907531	0.738982		0.0305591	0.0225943
-0.512	0.913201	0.725093		0.84753	0.688233		0.921218	0.768372		0.910064	0.758861		0.964326	0.78266		0.906103	0.778044		0.956072	0.767204		0.909548	0.777778			0.916008	0.755781		0.0355351	0.0327436
-0.448	0.893309	0.720831		0.864566	0.7173		0.889706	0.741917		0.920771	0.74275		0.909699	0.733373		0.876761	0.752894		0.956072	0.767204		0.930905	0.712843			0.905224	0.736139		0.0301255	0.0187557
-0.384	0.914105	0.727224		0.819421	0.702297		0.897059	0.758965		0.976445	0.774436		0.958751	0.751781		0.881455	0.727345		0.925065	0.749146		0.929648	0.793651			0.912744	0.748106		0.0486212	0.0289473
-0.32	0.895118	0.725626		0.899489	0.727614		0.923319	0.749559		0.980728	0.857143		0.958751	0.751781		0.881455	0.727345		0.939276	0.760859		0.907035	0.775373			0.923147	0.759413		0.0341981	0.0433332
-0.256	0.933092	0.781034		0.881601	0.715893		0.939076	0.809524		0.975375	0.887755		0.968785	0.776128		0.919014	0.752894		0.931525	0.818448		0.924623	0.804714			0.934136	0.793299		0.0293076	0.0507339
-0.192	0.911392	0.783697		0.886712	0.76512		0.929622	0.796002		1	0.96348		0.944259	0.829572		0.920188	0.798403		0.95478	0.902391		0.923367	0.864839			0.93379	0.837938		0.0337278	0.0679021
-0.128	0.91953	0.819393		0.927598	0.878106		0.947479	0.886537		1	0.996241		0.949833	0.922209		0.946009	0.894212		1	0.962909		0.954774	0.947571			0.955653	0.913397		0.0298083	0.0557184
-0.064	0.943942	0.921151		0.959966	0.924051		1	0.909465		0.98394	0.98174		0.983278	0.974466		1	0.96487		0.98708	0.959004		0.969849	0.94228			0.978507	0.947128		0.0195051	0.0268609
0	0.976492	1		0.979557	1		0.963235	1		0.964668	1		0.988852	1		0.924883	1		0.984496	1		1	1			0.972773	1		0.0228263	0
0.064	0.9783	0.972829		1	0.918894		0.939076	0.989418		0.949679	0.897959		0.988852	1		0.922535	0.913772		0.935401	0.900439		0.924623	0.976912			0.954808	0.946278		0.0301338	0.0424818
0.128	0.969259	0.976026		0.917376	0.880919		0.982143	0.971193		0.922912	0.8029		1	0.961401		0.889671	0.87984		0.959948	0.851147		0.924623	0.976912			0.945742	0.912542		0.037682	0.0674653
0.192	1	0.987214		0.897785	0.793249		0.942227	0.9806		0.926124	0.808271		0.975474	0.934679		0.889671	0.87984		0.899225	0.748658		0.925879	0.825878			0.932048	0.869799		0.0391464	0.089939
0.256	0.942134	0.928609		0.918228	0.796062		0.943277	0.915932		0.884368	0.778195		0.939799	0.861639		0.856808	0.769261		0.906977	0.755979		0.913317	0.793651			0.913113	0.824916		0.0305303	0.0678522
0.32	0.883363	0.869473		0.852641	0.719175		0.882353	0.840094		0.90257	0.744361		0.916388	0.801069		0.880282	0.71976		0.936693	0.739385		0.878141	0.793651			0.891554	0.778371		0.0260454	0.0566617
0.384	0.87613	0.78423		0.859455	0.696671		0.87605	0.84127					0.906355	0.793943		0.875587	0.663074		0.931525	0.780381		0.899497	0.79317			0.889228	0.764677		0.0245136	0.0620641
0.448	0.850814	0.74374		0.850085	0.690577		0.87605	0.84127					0.93534	0.777316		0.879108	0.664271		0.914729	0.736457		0.89196	0.758057			0.885441	0.744527		0.0315371	0.0577851
0.512	0.868897	0.72456					0.907563	0.808348					0.939799	0.804632		0.850939	0.644311		0.927649	0.76818		0.909548	0.765753			0.900732	0.752631		0.0342577	0.0612266
0.576	0.796564	0.7187					0.910714	0.760141					0.93534	0.769596		0.888498	0.689022									0.882779	0.734365		0.060577	0.0374479
0.64
0.704
0.768
0.832
Experiment 2
	Line scan 1		2		3		4		5		6		7		8		9		10		11		12		13		14		15		16		17		18		19		20		21		22		23		24		25
Distance from peak ACA intensity (μm)	mCherry	HEC1	mCherry	HEC1	mCherry	HEC1	mCherry	HEC1	mCherry	HEC1	mCherry	HEC1	mCherry	HEC1	mCherry	HEC1	mCherry	HEC1	mCherry	HEC1	mCherry	HEC1	mCherry	HEC1	mCherry	HEC1	mCherry	HEC1	mCherry	HEC1	mCherry	HEC1	mCherry	HEC1	mCherry	HEC1	mCherry	HEC1	mCherry	HEC1	mCherry	HEC1	mCherry	HEC1	mCherry	HEC1	mCherry	HEC1	mCherry
-1.536	0	0	0	0	0	0	0	0	0	0	0	0	0	0	0	0	0	0	0	0	0	0	0	0	0	0	0	0	0	0	0	0	0	0	0.9356	0.7043	0	0	0	0	0	0	0	0	0	0	0	0	0
-1.472	0	0	0	0	0	0	0	0	0.9514	0.745	0	0	0	0	0	0	0	0	0	0	0	0	0	0	0	0	0	0	0	0	0	0	0	0	0.9397	0.6694	0	0	0	0	0	0	0	0	0	0	0	0	0
-1.408	0	0	0	0	0	0	0.929	0.7943	0.9704	0.7642	0	0	0	0	0	0	0	0	0	0	0	0	0	0	0	0	0	0	0	0	0	0	0	0	0.8896	0.7136	0	0	0	0	0	0	0	0	0	0	0	0	0
-1.344	0	0	0	0	0	0	0.929	0.7943	0.9356	0.7678	0	0	0	0	0	0	0	0	0	0	0	0	0	0	0	0	0	0	0	0	0	0	0	0	0.954	0.7136	0	0	0	0	0	0	0	0	0	0	0	0	0
-1.28	0	0	0	0	0	0	0.964	0.7817	0.9652	0.7783	0	0	0	0	0	0	0	0	0.9112	0.8966	0	0	0	0	0	0	0	0	0	0	0	0	0	0	0.9438	0.7249	0	0	0	0	0	0	0	0	0	0	0	0	0.8898
-1.216	0	0	0	0	0	0	0.9667	0.8171	0.9462	0.7546	0.952	0.6685	0	0	0	0	0	0	0.9036	0.9128	0	0	0	0	0	0	0	0	0	0	0	0	0	0	0.9612	0.7279	0	0	0	0	0.7507	0.8285	0	0	0	0	0	0	0.8898
-1.152	0	0	0	0	0	0	0.9847	0.8011	0.9747	0.773	0.969	0.6765	0	0	0.9654	0.7453	0	0	0.9244	0.8912	0.9076	0.8273	0	0	0	0	0	0	0	0	0.8935	0.7488	0	0	0.9018	0.6941	0.9348	0.7475	0	0	0.7688	0.8009	0	0	0.8417	0.7433	0	0	0.9278
-1.088	0	0	0	0	0	0	0.9883	0.7771	1	0.7967	0.948	0.655	0	0	0.9654	0.7453	0.885	0.7745	0.9263	0.866	0.8808	0.7908	0	0	0	0	0	0	0	0	0.8935	0.7488	0	0	0.9468	0.7125	0.9197	0.7455	0.8029	0.7623	0.7443	0.7976	0.8708	0.881	0.8417	0.7433	0	0	0.9217
-1.024	0	0	0.9411	0.7799	0.9108	0.7847	0.9532	0.7863	0.9377	0.8011	0.997	0.6693	0	0	0.9917	0.7051	0.9286	0.7396	0.9263	0.929	0.9242	0.8296	0	0	0	0	0	0	0	0	0.9035	0.7488	0	0	0.9438	0.7136	0.9613	0.7782	0.7749	0.7387	0.7659	0.7699	0.8817	0.8385	0.8855	0.7423	0	0	0.9572
-0.96	0.9701	0.7889	0.9713	0.74	0.9187	0.7663	0.9272	0.8354	0.9789	0.7958	0.922	0.6884	0	0	0.9344	0.7248	0.9464	0.7651	0.8885	0.8507	0.9076	0.7797	0	0	0	0	0	0	0	0	0.9049	0.7458	0.8313	0.806	0.9141	0.7403	0.9282	0.7347	0.8113	0.7049	0.7816	0.823	0.879	0.8268	0.8341	0.7423	0	0	0.8935
-0.896	0.9798	0.7878	0.996	0.7788	0.8942	0.7973	0.9101	0.7989	0.9704	0.8002	0.939	0.6614	0	0	0.9845	0.7489	0.9196	0.7736	0.9178	0.8606	0.9104	0.8708	0	0	0	0	0	0	0	0	0.9571	0.7488	0.8417	0.854	0.8814	0.7228	0.9245	0.7396	0.8165	0.7418	0.7647	0.8031	0.8912	0.8289	0.889	0.721	0.8252	0.9019	0.9253
-0.832	0.9604	0.821	0.9196	0.7887	0.9455	0.7938	0.9299	0.8229	0.9176	0.7564	0.929	0.69	0	0	0.9845	0.7489	0.913	0.7396	0.932	0.8678	0.9288	0.8534	0.9203	0.7998	0.8895	0.8432	0	0	0	0	0.9149	0.7618	0.8166	0.806	0.8671	0.7413	0.9301	0.7822	0.797	0.7807	0.8037	0.8297	0.8851	0.8257	0.804	0.7455	0.8252	0.9019	0.9376
-0.768	0.9666	0.8232	0.9554	0.7865	0.9108	0.7766	0.9362	0.8251	0.9219	0.8072	0.947	0.682	0	0	0.9845	0.7694	0.8984	0.7321	0.931	0.911	0.9455	0.8621	0.9307	0.866	0.9273	0.8442	0.9254	0.917	0.9012	0.8743	0.9414	0.7658	0.7885	0.815	0.9376	0.7279	0.915	0.7614	0.8504	0.7725	0.8026	0.802	0.9021	0.8704	0.878	0.7476	0.8101	0.8919	0.9388
-0.704	0.9824	0.8157	0.9578	0.7931	0.9305	0.7984	0.9425	0.8343	0.9324	0.8081	0.962	0.6383	0	0	0.9523	0.7846	0.9208	0.7698	0.931	0.911	0.9242	0.8748	0.9072	0.8414	0.9282	0.8096	0.9496	0.9096	0.8818	0.8834	0.9292	0.7908	0.8289	0.775	0.9274	0.7269	0.9009	0.8099	0.8048	0.7295	0.8288	0.8429	0.9184	0.8236	0.8602	0.738	0.8739	0.8894	0.896
-0.64	0.9376	0.8532	0.9642	0.8285	0.9424	0.7938	0.9739	0.8263	0.9525	0.8081	0.998	0.6765	0.9024	0.7816	0.9773	0.7614	0.9342	0.7406	0.9282	0.9263	0.9205	0.8566	0.8978	0.8304	0.9358	0.834	0.9157	0.8947	0.9446	0.889	0.965	0.7708	0.8319	0.79	0.9683	0.7598	0.9566	0.7802	0.8647	0.7633	0.8253	0.7976	0.9082	0.8587	0.8725	0.7561	0.8383	0.8472	0.9572
-0.576	0.9455	0.85	0.9124	0.8153	0.9329	0.8351	0.9622	0.8331	0.9345	0.8002	0.96	0.6789	0.9139	0.814	0.969	0.7542	0.9051	0.7755	0.9839	0.8642	0.9039	0.8558	0.9644	0.8193	0.898	0.8605	0.9409	0.8479	0.9335	0.8969	0.965	0.7708	0.838	0.792	0.8988	0.7598	1	0.8119	0.8608	0.7326	0.8195	0.844	0.8878	0.8363	0.8951	0.7646	0.8595	0.9044	0.907
-0.512	0.9279	0.8167	0.9307	0.8075	0.9479	0.8316	0.973	0.8263	0.9293	0.8387	0.942	0.7099	0.9105	0.8069	0.969	0.7542	0.904	0.784	0.9565	0.9074	0.9409	0.8598	0.9297	0.7854	0.9603	0.8534	0.9341	0.9011	0.9677	0.8754	0.96	0.8118	0.8613	0.811	0.8988	0.7598	0.9216	0.8337	0.8835	0.7787	0.7839	0.7987	0.9096	0.7737	0.8753	0.7657	0.8478	0.8609	0.9021
-0.448	0.927	0.8725	1	0.8573	0.925	0.8648	0.9703	0.8389	0.9282	0.8519	0.971	0.7011	0.8783	0.7978	0.9344	0.7927	0.9576	0.8283	0.9499	0.8948	0.9085	0.8701	0.9082	0.8422	0.9264	0.8656	0.9603	0.8426	0.9557	0.9049	0.8935	0.7618	0.8686	0.813	0.9632	0.7413	0.9197	0.796	0.9018	0.7777	0.8294	0.8496	0.9993	0.8417	0.8616	0.7977	0.8636	0.882	0.9155
-0.384	1	0.8403	0.9371	0.8197	0.9621	0.8488	0.938	0.8503	0.9894	0.7642	0.963	0.7369	0.9265	0.8261	0.901	0.7918	0.9576	0.8283	0.9716	0.9227	0.9751	0.8487	0.926	0.8329	0.9707	0.8035	0.9486	0.8872	0.94	0.9162	0.995	0.8068	0.8435	0.828	0.9499	0.7628	0.967	0.8317	0.8901	0.75	0.8294	0.8496	0.9993	0.8417	0.8945	0.8211	0.8766	0.8845	0.9192
-0.32	0.9244	0.8628	0.9475	0.865	0.9227	0.8637	1	0.92	0.9208	0.7905	0.966	0.7305	0.8783	0.8372	0.9308	0.8088	0.952	0.8009	0.9367	0.8525	0.939	0.8233	0.8978	0.8355	0.9632	0.8635	0.969	0.8372	0.9778	0.9196	0.9743	0.7808	0.8729	0.842	0.9509	0.7711	0.9594	0.8555	0.9206	0.7797	0.8369	0.8053	0.9477	0.797	0.9534	0.8626	0.8711	0.882	0.9107
-0.256	0.9191	0.8928	0.8718	0.8927	0.9408	0.9084	0.9901	0.9109	0.9081	0.8528	0.976	0.8339	0.9116	0.8696	1	0.874	0.9018	0.8519	1	0.9595	0.9464	0.9382	0.9185	0.849	0.9613	0.8829	0.9399	0.884	0.9409	0.9173	1	0.8318	0.8936	0.834	0.9806	0.8501	0.9462	0.8505	0.9206	0.7797	0.9342	0.8263	0.985	0.8278	0.9877	0.869	0.8931	0.923	0.9131
-0.192	0.9252	0.9196	0.9483	0.9248	0.9495	0.8797	0.9865	0.9783	0.9483	0.8826	1	0.8665	0.9047	0.8948	1	0.874	0.9609	0.8906	0.9745	0.9685	0.9455	0.9287	0.9925	0.8736	1	0.9359	0.9535	0.9181	1	0.9173	0.9557	0.9419	0.9242	0.868	0.907	0.9353	0.9877	0.8485	1	0.8125	0.9511	0.8529	1	0.8714	0.9753	0.8648	0.902	0.9391	0.9204
-0.128	0.9173	0.9593	0.9467	0.9635	0.9242	0.9221	0.964	0.9794	0.944	0.9693	0.929	0.9444	0.9047	0.8948	0.9749	0.9589	0.952	0.8877	0.9745	0.9685	1	0.9327	1	0.9194	0.9877	0.9929	0.9651	0.9681	0.9344	0.9207	0.96	0.9109	1	0.892	0.955	0.9743	0.9622	0.9168	0.9414	0.9109	0.9703	0.8407	0.9538	0.949	0.9959	0.9265	0.9472	0.9938	0.9657
-0.064	0.9252	0.9957	0.9069	0.9712	1	0.9542	0.9371	0.9486	0.9778	0.9465	0.916	0.9189	1	0.9828	0.9618	0.9937	0.9565	0.9236	0.9527	0.9344	0.9344	0.9691	0.9794	0.9729	0.9821	0.9501	0.9942	0.983	0.9474	0.9819	0.96	0.9109	0.9285	0.987	0.9928	0.9959	0.9821	0.9366	0.9096	0.9672	1	0.9215	0.998	0.9819	0.9911	0.9159	1	0.9528	0.9939
0	0.9666	1	0.91	1	0.9503	1	0.9056	1	0.9282	1	0.919	1	0.946	1	0.9809	1	1	1	0.9376	1	0.9159	1	0.985	1	0.9415	1	0.9593	1	0.8984	1	0.9178	1	0.8985	1	1	1	0.9972	1	0.9206	1	0.9779	1	0.915	1	1	1	0.9459	1	0.9816
0.064	0.949	0.9389	0.9029	0.9945	0.9819	0.9645	0.9263	0.8709	0.9493	0.8913	0.875	0.8696	0.946	1	0.9463	0.9285	0.9085	0.9453	0.9499	0.9568	0.9076	0.9097	0.9644	0.9788	0.9424	0.9807	1	0.9883	0.9104	0.9706	0.8821	0.9139	0.8985	0.93	0.9714	0.9795	0.9811	0.9901	0.9284	0.9795	0.8783	0.9856	0.9286	0.9862	0.9075	0.9105	0.9376	0.9466	1
0.128	0.9024	0.881	0.8949	0.9027	0.9377	0.9519	0.9182	0.8434	0.9208	0.8729	0.895	0.7886	0.8875	0.9494	0.9463	0.9285	0.8594	0.834	0.9225	0.9263	0.915	0.9184	0.9288	0.9559	0.9594	0.9114	0.999	0.9617	0.9298	0.9864	0.8685	0.8228	0.8655	0.968	0.954	0.923	0.9131	0.9673	0.8699	0.9867	0.8701	0.9281	0.9463	0.9926	0.8513	0.8882	0.9376	0.9466	0.9339
0.192	0.8206	0.8789	0.8217	0.8839	0.9321	0.9359	0.8966	0.8606	0.8881	0.8247	0.843	0.717	0.9001	0.9474	0.9475	0.9053	0.8806	0.8547	0.9244	0.9487	0.8549	0.8257	0.9213	0.894	0.9481	0.8798	0.9593	0.9457	0.8975	0.9479	0.862	0.8569	0.8668	0.955	0.953	0.884	0.8848	0.9356	0.8822	0.9016	0.8002	0.875	0.9245	0.8619	0.8574	0.8009	0.8437	0.9453	0.9559
0.256	0.8936	0.8167	0.8201	0.875	0.9053	0.9061	0.8795	0.8023	0.9261	0.7607	0.844	0.6884	0.915	0.9221	0.9057	0.7882	0.8616	0.8368	0.9282	0.9047	0.8974	0.8328	0.9128	0.8711	0.9103	0.8819	0.9874	0.9053	0.9049	0.9411	0.8663	0.8188	0.8001	0.912	0.9162	0.8593	0.8196	0.9406	0.8504	0.8228	0.7851	0.8518	0.8736	0.8289	0	0	0.8383	0.8882	0.9192
0.32	0.8672	0.8457	0	0	0.8635	0.8809	0	0	0.8765	0.7897	0	0	0.8772	0.8544	0.9511	0.7489	0	0	0.9159	0.8993	0.8558	0.7932	0.8913	0.8711	0.9169	0.8941	0.9816	0.8723	0.9492	0.8856	0.8227	0.8368	0.8227	0.885	0.9029	0.8737	0.8961	0.896	0.8354	0.791	0.7932	0.8285	0	0	0	0	0.8369	0.8832	0.929
0.384	0	0	0	0	0.8619	0.8603	0	0	0	0	0	0	0.8703	0.8595	0	0	0	0	0	0	0.8817	0.8273	0.866	0.849	0	0	0.9361	0.8713	0.8966	0.9581	0	0	0.8539	0.876	0.9203	0.8522	0.8499	0.902	0.8152	0.7592	0	0	0	0	0	0	0	0	0.9033
0.448	0	0	0	0	0	0	0	0	0	0	0	0	0.8863	0.8362	0	0	0	0	0	0	0.9399	0.8114	0	0	0	0	0	0	0	0	0	0	0.8386	0.861	0	0	0	0	0.8191	0.7797	0	0	0	0	0	0	0	0	0
0.512	0	0	0	0	0	0	0	0	0	0	0	0	0	0	0	0	0	0	0	0	0	0	0	0	0	0	0	0	0	0	0	0	0	0	0	0	0	0	0	0	0	0	0	0	0	0	0	0	0
0.576	0	0	0	0	0	0	0	0	0	0	0	0	0	0	0	0	0	0	0	0	0	0	0	0	0	0	0	0	0	0	0	0	0	0	0	0	0	0	0	0	0	0	0	0	0	0	0	0	0
0.64	0	0	0	0	0	0	0	0	0	0	0	0	0	0	0	0	0	0	0	0	0	0	0	0	0	0	0	0	0	0	0	0	0	0	0	0	0	0	0	0	0	0	0	0	0	0	0	0	0
0.704	0	0	0	0	0	0	0	0	0	0	0	0	0	0	0	0	0	0	0	0	0	0	0	0	0	0	0	0	0	0	0	0	0	0	0	0	0	0	0	0	0	0	0	0	0	0	0	0	0
0.768	0	0	0	0	0	0	0	0	0	0	0	0	0	0	0	0	0	0	0	0	0	0	0	0	0	0	0	0	0	0	0	0	0	0	0	0	0	0	0	0	0	0	0	0	0	0	0	0	0
0.832	0	0	0	0	0	0	0	0	0	0	0	0	0	0	0	0	0	0	0	0	0	0	0	0	0	0	0	0	0	0	0	0	0	0	0	0	0	0	0	0	0	0	0	0	0	0	0	0	0
0.896	0	0	0	0	0	0	0	0	0	0	0	0	0	0	0	0	0	0	0	0	0	0	0	0	0	0	0	0	0	0	0	0	0	0	0	0	0	0	0	0	0	0	0	0	0	0	0	0	0
0.96	0	0	0	0	0	0	0	0	0	0	0	0	0	0	0	0	0	0	0	0	0	0	0	0	0	0	0	0	0	0	0	0	0	0	0	0	0	0	0	0	0	0	0	0	0	0	0	0	0
[truncated: 17 more columns]

## Sheet: mCh-WT & GFP-HURP
Experiment 1
	Line scan 1				2				3				4				5				6				7				8					AVERAGE				STANDARD DEVIATION
Distance from peak ACA intensity (μm)	GFP (HURP)	mCherry	HEC1		GFP (HURP)	mCherry	HEC1		GFP (HURP)	mCherry	HEC1		GFP (HURP)	mCherry	HEC1		GFP (HURP)	mCherry	HEC1		GFP (HURP)	mCherry	HEC1		GFP (HURP)	mCherry	HEC1		GFP (HURP)	mCherry	HEC1			GFP (HURP)	mCherry	HEC1		GFP (HURP)	mCherry	HEC1
-2.752																					0.48011	0.817573	0.602354
-2.688																					0.524201	0.783264	0.590164
-2.624																					0.537527	0.793305	0.577554
-2.56																					0.554772	0.821757	0.577133
-2.496																					0.566529	0.779079	0.618327
-2.432																					0.560455	0.784937	0.608239
-2.368																					0.566921	0.800837	0.595208
-2.304																					0.559475	0.819247	0.601513
-2.24																					0.604938	0.762343	0.605717
-2.176																					0.620419	0.808368	0.587222
-2.112																					0.61454	0.858577	0.615805
-2.048																					0.635117	0.841841	0.600252
-1.984																					0.659612	0.820084	0.571248
-1.92																					0.666275	0.851046	0.617066
-1.856																					0.681952	0.821757	0.611181
-1.792																					0.730551	0.830962	0.611602
-1.728																					0.74662	0.876151	0.653216
-1.664																					0.796198	0.825941	0.642707
-1.6																					0.811287	0.874477	0.620849
-1.536																					0.844797	0.863598	0.650273
-1.472																					0.851264	0.85523	0.626734
-1.408																					0.870664	0.882845	0.607818
-1.344													0.916527	0.913116	0.652636						0.867921	0.903766	0.623792											0.892224	0.908441	0.638214		0.0343699	0.00661175	0.0203962
-1.28					0.938563	0.995682	0.722508						0.939952	0.954052	0.669643						0.898883	0.885356	0.627154											0.925799	0.94503	0.673102		0.0233206	0.0557136	0.0477707
-1.216					0.990233	0.993831	0.728674						0.981037	0.984127	0.688776						0.908877	0.882845	0.600252											0.960049	0.953601	0.672567		0.0445542	0.0614682	0.0657273
-1.152					0.965028	0.978408	0.676259						0.975274	0.90142	0.707483						0.890653	0.906276	0.628836		0.841425	0.927782	0.802232							0.918095	0.928472	0.703702		0.0635177	0.0352069	0.0732132
-1.088	0.975685	0.96954	0.647004		0.971014	0.971006	0.681398						1	0.898914	0.712585		1	0.987251	0.704315		0.893592	0.887029	0.612022		0.841425	0.927782	0.802232							0.946953	0.940254	0.693259		0.0648319	0.0417359	0.0651928
-1.024	0.983904	0.946857	0.645599		0.982357	0.973473	0.729188						0.960587	0.908104	0.742347		1	0.987251	0.704315		0.899079	0.87113	0.637243		0.863071	0.905692	0.766274							0.948166	0.932084	0.704161		0.0546589	0.0446356	0.052631
-0.96	0.999315	0.963707	0.6353		0.99811	0.951265	0.734327						0.937163	0.959064	0.784439		0.979109	0.961753	0.759729		0.919459	0.893724	0.659521		0.877182	0.899745	0.787353		0.993781	0.994113	0.620624			0.957731	0.946196	0.711613		0.0474203	0.0363936	0.0715163
-0.896	1	0.903435	0.646067		1	0.954349	0.73073		0.940097	0.958543	0.73899		0.920989	0.966583	0.869473		0.995125	1	0.791878		0.935528	0.920502	0.631778		0.86618	0.918437	0.721017		1	0.922624	0.648534			0.95724	0.943059	0.722308		0.0497018	0.0322171	0.0813277
-0.832	0.990753	0.935191	0.655431		0.988658	0.989513	0.731757		1	0.904523	0.761547		0.88232	0.949875	0.81335		0.995125	1	0.791878		0.991378	0.903766	0.625893		0.907678	0.893798	0.778053		0.991628	0.971405	0.675497			0.968442	0.943509	0.729176		0.0459616	0.0409985	0.0691247
-0.768	0.977055	0.936487	0.633427		0.960618	0.936459	0.74666		0.986151	0.929648	0.698711		0.883436	0.984962	0.772534		0.947597	0.923506	0.832064		0.980992	0.916318	0.659941		0.892251	0.953271	0.756975		0.936371	0.969722	0.734626			0.945559	0.943797	0.729367		0.0394817	0.0236968	0.0637666
-0.704	0.952055	0.95269	0.651217		0.949275	0.90438	0.750771		0.948792	0.965452	0.74275		0.849228	0.975773	0.752976		0.89415	0.957769	0.896362		1	0.932218	0.665826		0.879574	0.919286	0.773714		0.889128	0.985702	0.70246			0.920275	0.949159	0.742009		0.0498241	0.0282345	0.0761941
-0.64	0.952055	0.961115	0.666199		0.931632	0.958051	0.761048		0.95942	0.952261	0.732546		0.848485	0.986633	0.730442		0.89415	0.957769	0.896362		0.98883	0.94477	0.693148		0.887945	0.893798	0.762554		0.889128	0.985702	0.70246			0.918956	0.955012	0.743095		0.0466121	0.0289224	0.0702263
-0.576	0.930137	0.945561	0.691479		0.913359	0.995065	0.763618		0.938808	0.947236	0.742213		0.805912	0.934002	0.732143		0.881616	0.967331	0.818951		0.951205	0.914644	0.689365		0.923702	0.953271	0.758834		0.862337	0.963835	0.692053			0.900885	0.952618	0.736082		0.0483726	0.0239397	0.0452085
-0.512	0.843836	0.954634	0.687266		0.897606	0.99013	0.736382		0.880837	0.953518	0.794844		0.822458	0.934002	0.779762		0.887013	0.952191	0.826142		0.946306	0.952301	0.698613		0.929801	0.942226	0.756975		0.828609	0.952061	0.700568			0.879558	0.953883	0.747569		0.0455051	0.016276	0.0505696
-0.448	0.858904	0.96954	0.685861		0.84184	0.963603	0.755396		0.872142	0.962312	0.75725		0.820227	0.956558	0.759779		0.887013	0.952191	0.826142		0.939447	0.915481	0.691047		1	1	0.784253		0.792011	0.920101	0.715232			0.876448	0.954973	0.74687		0.0667192	0.0271342	0.0476114
-0.384	0.830822	0.99676	0.690543		0.849716	1	0.856115		0.901771	0.937814	0.739527		0.820227	0.956558	0.759779		0.849408	0.968924	0.841371		0.967666	1	0.715006		0.990433	0.937128	0.799132		0.791054	0.948696	0.664144			0.875137	0.968235	0.758202		0.0716353	0.0273687	0.0695095
-0.32	0.838014	0.954634	0.745318		0.84436	0.961135	0.880267		0.868277	0.933417	0.753491		0.808515	0.940685	0.766582		0.834958	0.952988	0.867597		0.912209	0.920502	0.730559		0.990433	0.937128	0.799132		0.782442	0.952061	0.662252			0.859901	0.944069	0.77565		0.0652774	0.0134948	0.0720477
-0.256	0.847945	0.985742	0.777622		0.801827	0.991363	0.902878		0.879549	0.962312	0.760473		0.782487	0.976608	0.820153		0.834958	0.952988	0.867597		0.877719	0.969874	0.70786		0.930758	0.958369	0.761934		0.772635	0.972246	0.719962			0.840985	0.971188	0.78981		0.0542581	0.0132312	0.0688026
-0.192	0.813014	0.976021	0.83427		0.763705	0.98211	0.972765		0.817391	0.959799	0.854995		0.746049	0.974937	0.847364		0.81337	0.963347	0.864636		0.835979	0.94728	0.796133		0.928008	0.965166	0.847489		0.743691	0.982338	0.793756			0.807651	0.968875	0.851426		0.0600731	0.0121729	0.0555747
-0.128	0.784247	1	0.917603		0.76339	0.959284	1.01079		0.791304	0.934673	0.906552		0.695668	0.980785	0.923895		0.751219	0.916335	0.93824		0.860474	0.938912	0.895334		0.91581	0.940527	0.873528		0.728382	0.947014	0.875118			0.786312	0.952191	0.917633		0.0713422	0.0269533	0.0439402
-0.064	0.755479	0.987686	0.967697		0.757404	0.933374	0.991778		0.794847	0.980528	0.931257		0.66741	1	0.962585		0.751219	0.916335	0.93824		0.861258	0.976569	0.928962		0.925616	0.995752	0.934284		0.703146	1	0.951277			0.777047	0.973781	0.95076		0.0832216	0.0317063	0.0220168
0	0.763356	0.976669	1		0.755198	0.905614	1		0.751047	1	1		0.65105	1	1		0.717792	0.90996	1		0.851852	0.990795	1		0.86618	0.961767	1		0.726229	0.982338	1			0.760338	0.965893	1		0.0703223	0.0380081	0
0.064	0.725685	0.977965	0.96161		0.695652	0.923504	0.903905		0.727536	0.985553	0.986037		0.613497	0.960735	0.981718		0.666086	0.963347	0.972081		0.846169	0.948954	0.936528		0.903133	0.990654	0.985121		0.708288	0.973928	0.968307			0.735756	0.96558	0.961913		0.0945206	0.0217977	0.0284515
0.128	0.740753	0.977317	0.969101		0.715501	0.93029	0.831449		0.719485	0.937814	0.936627		0.616471	0.949039	0.884779		0.666086	0.963347	0.972081		0.804233	0.956485	0.917612		0.865702	0.971963	0.99256		0.695132	0.940286	0.923841			0.72792	0.953318	0.928506		0.0779348	0.0168734	0.0523562
0.192	0.724658	0.997408	0.877341		0.678324	0.90438	0.820658		0.725926	0.961683	0.911386		0.577617	0.912281	0.801871		0.625174	0.894821	0.905245		0.794435	0.994979	0.872636		0.820378	0.965166	0.945443		0.664275	0.934399	0.868496			0.701348	0.945639	0.875384		0.0819382	0.0401374	0.0471383
0.256	0.682192	0.941024	0.848315		0.681474	0.919803	0.767215		0.681481	0.913317	0.854458		0.593605	0.922306	0.741497		0.615425	0.921116	0.780457		0.760925	0.92636	0.822194		0.812126	0.925234	0.84067		0.660089	0.888982	0.757332			0.685915	0.919768	0.801517		0.0714803	0.0147492	0.0449255
0.32	0.688356	0.91186	0.74485		0.659105	0.937076	0.78777		0.67182	0.975503	0.844253		0.561814	0.886383	0.677296		0.615425	0.921116	0.780457		0.762689	0.938912	0.769231		0.839153	0.871708	0.845629		0.660089	0.888982	0.757332			0.682306	0.916442	0.775852		0.0855505	0.0340596	0.0544743
0.384	0.724658	0.966948	0.703184		0.641147	0.882788	0.790339		0.690821	0.959799	0.862513		0.546198	0.896408	0.6875		0.582695	0.900398	0.75		0.735058	0.979079	0.811265						0.652314	0.934399	0.68685			0.65327	0.931403	0.75595		0.0704611	0.0385165	0.0681642
0.448	0.689384	0.879456	0.691011						0.683414	0.917085	0.867884		0.571854	0.91061	0.67517		0.560759	0.904382	0.697124		0.711542	0.956485	0.81715						0.670135	0.923465	0.679754			0.647848	0.915247	0.738015		0.0646583	0.0252669	0.0828898
0.512	0.69863	0.905379	0.650281																										0.681976	0.910008	0.657994			0.690303	0.907694	0.654138		0.0117764	0.00327339	0.00545421
0.576
0.64
0.704
0.768
Experiment 2
	Line scan 1			2			3			4			5			6			7			8			9			10			11			12			13			14			15			16			17
Distance from peak ACA intensity (μm)	GFP (HURP)	mCherry	HEC1	GFP (HURP)	mCherry	HEC1	GFP (HURP)	mCherry	HEC1	GFP (HURP)	mCherry	HEC1	GFP (HURP)	mCherry	HEC1	GFP (HURP)	mCherry	HEC1	GFP (HURP)	mCherry	HEC1	GFP (HURP)	mCherry	HEC1	GFP (HURP)	mCherry	HEC1	GFP (HURP)	mCherry	HEC1	GFP (HURP)	mCherry	HEC1	GFP (HURP)	mCherry	HEC1	GFP (HURP)	mCherry	HEC1	GFP (HURP)	mCherry	HEC1	GFP (HURP)	mCherry	HEC1	GFP (HURP)	mCherry	HEC1	GFP (HURP)
-1.472	0	0	0	0	0	0	0	0	0	0	0	0	0	0	0	0	0	0	0	0	0	0	0	0	0	0	0	0	0	0	0	0	0	0	0	0	0	0	0	0	0	0	0	0	0	0	0	0	0
-1.408	0	0	0	0	0	0	0	0	0	0	0	0	0	0	0	0	0	0	0	0	0	0	0	0	0.9894	0.9491	0.6907	0	0	0	0	0	0	0	0	0	0	0	0	0	0	0	0	0	0	0	0	0	0
-1.344	0	0	0	0	0	0	0	0	0	0	0	0	0	0	0	0	0	0	0	0	0	0	0	0	0.9894	0.9491	0.6907	0	0	0	0	0	0	0	0	0	0	0	0	0	0	0	0	0	0	0	0	0	0
-1.28	0	0	0	0	0	0	0	0	0	0	0	0	0	0	0	0	0	0	0.9963	0.9396	0.7335	0	0	0	0.9591	0.8897	0.6783	0	0	0	0	0	0	0	0	0	0	0	0	0	0	0	1	0.9819	0.6648	0	0	0	0
-1.216	0	0	0	0	0	0	0	0	0	0.997	0.9157	0.7063	0	0	0	0.9817	0.9707	0.7644	0.9332	0.8918	0.7353	1	0.9312	0.7288	0.9548	0.9297	0.7032	0	0	0	0	0	0	0	0	0	0	0	0	0	0	0	0.987	0.9912	0.6845	0	0	0	0
-1.152	1	0.9271	0.8199	0	0	0	0	0	0	0.997	0.9157	0.7063	0	0	0	0.9767	0.9804	0.7635	0.9599	0.9385	0.7151	0.9659	0.9514	0.7305	0.9548	0.9297	0.7032	0	0	0	0	0	0	0	0	0	0	0	0	0	0	0	0.957	0.9841	0.7034	0.9895	0.9978	0.8455	0
-1.088	1	0.9271	0.8199	0	0	0	0	0	0	0.9864	0.8811	0.7026	0	0	0	1	0.9389	0.7827	0.9639	0.8823	0.7344	0.9248	0.9466	0.7237	0.9961	0.9297	0.6854	0	0	0	0	0	0	0	0	0	0	0	0	0	0	0	0.9568	0.9649	0.7419	0.9868	1	0.8476	1
-1.024	0.9941	0.9514	0.8282	0	0	0	0	0	0	0.9512	0.9124	0.7452	1	0.9632	0.7569	0.9296	0.9597	0.7426	0.9521	0.8887	0.762	0.9361	0.9893	0.734	1	0.9091	0.6996	0	0	0	0.9446	0.9703	0.811	0	0	0	0	0	0	0	0	0	0.9568	0.9649	0.7419	1	0.9432	0.8393	0.977
-0.96	0.9518	1	0.8872	0	0	0	0.9982	0.9349	0.765	0.9653	0.9405	0.7153	1	0.9632	0.7569	0.9451	0.9963	0.7504	0.9572	0.9438	0.7123	0.9257	0.9597	0.7314	0.9918	0.88	0.6836	0	0	0	0.9426	0.9517	0.8476	0	0	0	0	0	0	0.9936	0.9661	0.8776	0.9486	0.9281	0.753	0.9717	0.8938	0.8352	0.9357
-0.896	0.9368	0.9322	0.8851	1	0.9622	0.7533	1	0.9349	0.7571	1	0.9449	0.7298	0.9787	0.9781	0.7779	0.9323	0.9658	0.692	0.9366	0.9099	0.727	0.9369	0.9407	0.7074	0.958	0.9212	0.6952	0	0	0	0.9646	1	0.8232	0	0	0	1	0.9212	0.7824	0.9936	0.9661	0.8776	0.896	0.9314	0.7301	0.9717	0.8938	0.8352	0.9202
-0.832	0.9041	0.9604	0.8571	1	0.9622	0.7533	0.948	0.8899	0.7414	0.9542	0.9535	0.689	0.9545	0.9356	0.8074	0.9277	0.9536	0.7199	0.9649	0.9374	0.7261	0.946	0.93	0.728	0.8947	0.8946	0.689	0.9065	0.9667	0.9432	0.9088	0.9393	0.8313	0	0	0	1	0.9212	0.7824	0.9201	0.9121	0.8964	0.896	0.9314	0.7301	0.9642	0.9449	0.793	0.9331
-0.768	0.9195	0.9911	0.8509	0.974	0.9269	0.7915	0.9395	0.9437	0.7738	0.9729	0.9503	0.7344	0.9295	1	0.7731	0.8673	0.9768	0.7286	0.9444	0.9141	0.7518	0.9499	0.9644	0.7092	0.9096	0.9624	0.7175	0.854	0.8915	0.9208	1	0.9777	0.8892	0	0	0	0.9609	0.9225	0.8199	0.9498	0.9121	0.882	0.903	0.9654	0.7372	0.9323	0.9764	0.8393	0.8906
-0.704	0.8796	0.9425	0.8478	0.9662	0.9407	0.7996	0.9313	0.9537	0.7522	0.9156	0.9038	0.748	0.9119	0.9827	0.7893	0.8532	0.9352	0.7243	1	0.8918	0.7472	0.9205	0.9229	0.7288	0.8931	0.943	0.7068	0.8699	0.9223	0.8975	0.9018	0.9418	0.8699	0.8815	0.9664	0.8376	0.965	0.9136	0.8114	1	0.9372	0.8611	0.8656	0.9561	0.6932	0.9323	0.9764	0.8393	0.856
-0.64	0.8682	0.9808	0.8768	0.9822	0.8865	0.8197	0.9114	0.9562	0.7581	0.9156	0.9038	0.748	0.9211	0.9505	0.8332	0.8134	0.9804	0.7504	0.9869	0.9215	0.7546	0.8894	0.9526	0.7417	0.9273	0.9467	0.6898	0.9239	0.9322	0.8599	0.8726	0.9554	0.875	0.8671	0.9351	0.8571	0.919	0.9784	0.8049	0.9511	0.9384	0.8997	0.8656	0.9561	0.6932	0.9353	0.9342	0.8012	0.8118
-0.576	0.8504	0.945	0.8313	0.9331	0.9206	0.8026	0.9039	0.9825	0.7129	0.883	0.9546	0.7779	0.895	0.9459	0.8475	0.7809	0.9792	0.7155	0.9653	0.9226	0.7583	0.8704	0.911	0.7177	0.9191	0.9442	0.6916	0.9007	0.9692	0.8975	0.8118	0.9604	0.9035	0.8841	0.9039	0.9013	0.919	0.9784	0.8049	0.9758	0.9384	0.817	0.807	0.9127	0.7435	0.8986	0.946	0.8363	0.8118
-0.512	0.8208	0.9578	0.8696	0.9127	0.9256	0.8409	0.8931	0.965	0.765	0.8706	0.973	0.8005	0.8656	0.9609	0.8256	0.7553	0.9792	0.7435	0.9993	0.9237	0.7601	0.8765	0.9573	0.7742	0.9717	0.943	0.7166	0.9113	0.979	0.8599	0.8118	0.9604	0.9035	0.8849	0.9543	0.8294	0.9181	0.9403	0.8082	0.9301	0.9246	0.8445	0.8252	0.9517	0.716	0.8986	0.946	0.8363	0.8014
-0.448	0.8029	0.9552	0.8603	0.8722	0.9231	0.7875	0.9124	1	0.7896	0.8486	1	0.8132	0.8429	0.9597	0.8694	0.7694	0.9548	0.7565	0.9754	0.929	0.8079	0.9698	0.9703	0.7896	0.9442	0.9661	0.6961	0.9017	0.9223	0.8761	0.7943	0.9566	0.8669	0.9166	0.9087	0.9168	0.907	0.9581	0.8264	0.9082	0.9422	0.8666	0.8252	0.9517	0.716	0.8797	0.9292	0.8476	0.7585
-0.384	0.8029	0.9552	0.8603	0.8982	0.942	0.8218	0.923	0.98	0.7621	0.7919	0.9362	0.8033	0.7856	0.931	0.899	0.8152	0.9425	0.7714	0.9923	0.9088	0.7739	0.8894	0.9276	0.7502	0.9458	0.9636	0.7237	0.9176	0.9248	0.8203	0.7806	0.9864	0.8882	0.9319	0.9435	0.8715	0.9383	0.9365	0.8628	0.9265	0.9686	0.8578	0.7744	0.9791	0.7238	0.8419	0.9067	0.8342	0.7168
-0.32	0.8103	0.954	0.8913	0.8632	0.9117	0.8288	0.9134	0.9474	0.7817	0.8049	0.9903	0.8205	0.786	0.9482	0.9113	0.8152	0.9425	0.7714	0.9778	0.9109	0.8061	0.8687	0.9727	0.781	0.9458	0.9818	0.7112	0.9113	0.9162	0.8457	0.7702	0.9591	0.9116	0.9717	0.9411	0.9291	0.9328	0.9085	0.8521	0.921	0.9435	0.8556	0.7109	0.9912	0.8049	0.8419	0.9067	0.8342	0.7278
-0.256	0.7737	0.9207	0.941	0.8531	0.9168	0.8117	0.9098	0.9412	0.7896	0.794	0.9438	0.8586	0.7717	0.9206	0.9047	0.8321	0.9719	0.7827	0.9366	0.9343	0.8245	0.7724	0.9751	0.8246	0.8613	0.903	0.762	0.9663	1	0.8741	0.7061	0.9492	0.8953	0.9717	0.9411	0.9291	0.9186	1	0.8392	0.9498	0.9347	0.8578	0.7109	0.9912	0.8049	0.7914	0.9511	0.8301	0.7097
-0.192	0.7224	0.9335	0.9369	0.8112	1	0.9497	0.9263	0.9625	0.8387	0.7934	0.9578	0.951	0.7489	0.9379	0.9237	0.8092	0.9536	0.8656	0.8719	0.8865	0.8695	0.7909	0.9692	0.8178	0.8613	0.903	0.762	1	0.9655	0.9025	0.7215	0.9938	0.9319	1	0.9291	0.9301	0.8619	0.9504	0.9132	0.9132	0.9774	0.9063	0.6844	0.9775	0.9229	0.7719	0.8628	0.8713	0.6683
-0.128	0.6977	0.9412	0.9576	0.7864	0.9508	0.8892	0.9532	0.9862	0.9194	0.7934	0.9578	0.951	0.7283	0.9816	0.8742	0.7832	1	0.9127	0.8206	0.8802	0.9118	0.7404	0.9514	0.852	0.7941	0.9964	0.8271	0.8853	0.9926	0.9756	0.6857	0.9393	0.9553	0.9992	0.9483	0.9959	0.85	0.9504	0.9207	0.9109	0.9837	0.9107	0.6476	1	0.9953	0.7719	0.8628	0.8713	0.6396
-0.064	0.696	0.9412	0.9845	0.7608	0.9924	0.998	0.9023	0.9349	0.9017	0.7192	0.9319	0.9665	0.7115	0.9804	0.9218	0.7461	0.9646	0.9695	0.8146	1	0.9274	0.7184	1	0.9521	0.7206	0.9867	0.8806	0.7817	0.9778	0.9604	0.6449	0.9715	0.9756	0.9636	1	0.9496	0.838	0.9644	0.9528	0.8625	0.9485	0.9658	0.6476	1	0.9953	0.744	0.9275	0.9063	0.6396
0	0.7014	0.9527	1	0.7337	0.9306	1	0.9084	0.9449	1	0.6999	0.893	1	0.7107	0.9689	1	0.7255	0.9646	1	0.7866	0.9194	1	0.7024	0.9692	1	0.6935	1	1	0.7841	0.9692	1	0.6715	0.9814	1	0.9298	0.9988	1	0.7984	0.9504	1	0.8301	0.9548	1	0.632	0.9457	1	0.7097	0.8747	1	0.6289
0.064	0.6864	0.9182	0.9586	0.7274	0.9723	0.9718	0.8666	0.9149	0.9538	0.7102	0.9103	0.9828	0.6634	0.9574	0.9705	0.7672	0.9352	0.918	0.7997	0.9353	0.9623	0.689	0.9656	0.9581	0.688	0.977	0.975	0.7378	0.963	0.9371	0.6366	0.9777	0.997	0.8921	0.9664	0.9815	0.7948	0.9759	0.9754	0.8186	0.9598	0.9868	0.6139	0.8666	0.8332	0.7097	0.8747	1	0.6119
0.128	0.6457	0.9386	0.9213	0.7117	0.971	0.9668	0.8851	0.98	0.9803	0.6951	0.9254	0.9148	0.6557	0.9574	0.9409	0.7566	0.9548	0.8421	0.7802	0.8706	0.898	0.7244	0.9526	0.9658	0.6754	0.9309	0.9474	0.76	0.9149	0.933	0.5837	0.9566	0.9736	0.8921	0.9664	0.9815	0.798	0.9784	0.9775	0.7757	0.9799	0.9394	0.6139	0.8666	0.8332	0.6779	0.8527	0.9691	0.5831
0.192	0.6239	0.9591	0.8934	0.7048	0.9622	0.9074	0.8593	0.9575	0.9272	0.6815	0.9384	0.8459	0.6648	0.9264	0.8808	0.7489	0.9462	0.7627	0.7404	0.9268	0.8511	0.7037	0.9407	0.9076	0.6892	0.9867	0.9519	0.707	0.9014	0.9005	0.5716	0.9058	0.9583	0.846	0.9339	0.9332	0.798	0.9784	0.9775	0.736	1	0.9504	0.5994	0.8293	0.7199	0.6606	0.8786	0.93	0.5946
0.256	0	0	0	0.687	0.9054	0.9315	0.8111	0.97	0.8486	0.6716	0.9124	0.8323	0.6858	0.9056	0.8799	0.7164	0.9536	0.7487	0.7171	0.9205	0.8226	0.6786	0.9276	0.7725	0.6668	0.9212	0.9225	0.7099	0.9051	0.866	0.5429	0.9108	0.9085	0.8498	0.9411	0.9414	0.7566	0.9581	0.9143	0.757	0.99	0.8931	0.6074	0.8496	0.7152	0.6606	0.8786	0.93	0.5745
0.32	0	0	0	0.6553	0.9105	0.86	0.8171	0.9174	0.8643	0.6255	0.8919	0.8287	0.6461	0.8631	0.8246	0.7489	0.9315	0.7278	0.7043	0.9109	0.8401	0.6497	0.911	0.7271	0.624	0.9333	0.8645	0.7282	0.8681	0.8335	0.54	0.8897	0.8486	0.785	0.9351	0.889	0.7579	0.9149	0.9271	0.7355	0.9435	0.9184	0	0	0	0.6605	0.8584	0.8723	0.5781
0.384	0	0	0	0.641	0.9319	0.8399	0.7972	0.9449	0.823	0	0	0	0.6505	0.9114	0.8427	0.7461	0.9083	0.7103	0.6689	0.9024	0.8796	0.6778	0.9087	0.7417	0.6055	0.8861	0.8503	0.6993	0.9162	0.8031	0.5233	0.8897	0.8049	0.7643	0.8894	0.8345	0.6977	0.953	0.8703	0.7154	0.9221	0.8335	0	0	0	0.6494	0.8685	0.8744	0
0.448	0	0	0	0.6131	0.9521	0.851	0.7785	0.9399	0.8417	0	0	0	0.6204	0.9079	0.8132	0.7264	0.9377	0.6902	0.7084	0.9459	0.9035	0.676	0.917	0.7074	0.6	0.84	0.7879	0	0	0	0.5204	0.8786	0.7896	0.763	0.9147	0.8736	0	0	0	0.6779	0.9309	0.8291	0	0	0	0	0	0	0
0.512	0	0	0	0	0	0	0.7576	0.9412	0.8486	0	0	0	0.6307	0.9264	0.7817	0	0	0	0	0	0	0.686	0.8873	0.7203	0.5399	0.88	0.7816	0	0	0	0	0	0	0	0	0	0	0	0	0.6962	0.9322	0.871	0	0	0	0	0	0	0
0.576	0	0	0	0	0	0	0	0	0	0	0	0	0	0	0	0	0	0	0	0	0	0	0	0	0.5603	0.88	0.7362	0	0	0	0	0	0	0	0	0	0	0	0	0	0	0	0	0	0	0	0	0	0
0.64	0	0	0	0	0	0	0	0	0	0	0	0	0	0	0	0	0	0	0	0	0	0	0	0	0.514	0.8315	0.7077	0	0	0	0	0	0	0	0	0	0	0	0	0	0	0	0	0	0	0	0	0	0
0.704	0	0	0	0	0	0	0	0	0	0	0	0	0	0	0	0	0	0	0	0	0	0	0	0	0	0	0	0	0	0	0	0	0	0	0	0	0	0	0	0	0	0	0	0	0	0	0	0	0
0.768	0	0	0	0	0	0	0	0	0	0	0	0	0	0	0	0	0	0	0	0	0	0	0	0	0	0	0	0	0	0	0	0	0	0	0	0	0	0	0	0	0	0	0	0	0	0	0	0	0
0.832	0	0	0	0	0	0	0	0	0	0	0	0	0	0	0	0	0	0	0	0	0	0	0	0	0	0	0	0	0	0	0	0	0	0	0	0	0	0	0	0	0	0	0	0	0	0	0	0	0
0.896	0	0	0	0	0	0	0	0	0	0	0	0	0	0	0	0	0	0	0	0	0	0	0	0	0	0	0	0	0	0	0	0	0	0	0	0	0	0	0	0	0	0	0	0	0	0	0	0	0
0.96	0	0	0	0	0	0	0	0	0	0	0	0	0	0	0	0	0	0	0	0	0	0	0	0	0	0	0	0	0	0	0	0	0	0	0	0	0	0	0	0	0	0	0	0	0	0	0	0	0
1.024	0	0	0	0	0	0	0	0	0	0	0	0	0	0	0	0	0	0	0	0	0	0	0	0	0	0	0	0	0	0	0	0	0	0	0	0	0	0	0	0	0	0	0	0	0	0	0	0	0
1.088	0	0	0	0	0	0	0	0	0	0	0	0	0	0	0	0	0	0	0	0	0	0	0	0	0	0	0	0	0	0	0	0	0	0	0	0	0	0	0	0	0	0	0	0	0	0	0	0	0
1.152	0	0	0	0	0	0	0	0	0	0	0	0	0	0	0	0	0	0	0	0	0	0	0	0	0	0	0	0	0	0	0	0	0	0	0	0	0	0	0	0	0	0	0	0	0	0	0	0	0
1.216	0	0	0	0	0	0	0	0	0	0	0	0	0	0	0	0	0	0	0	0	0	0	0	0	0	0	0	0	0	0	0	0	0	0	0	0	0	0	0	0	0	0	0	0	0	0	0	0	0
1.28	0	0	0	0	0	0	0	0	0	0	0	0	0	0	0	0	0	0	0	0	0	0	0	0	0	0	0	0	0	0	0	0	0	0	0	0	0	0	0	0	0	0	0	0	0	0	0	0	0
1.344	0	0	0	0	0	0	0	0	0	0	0	0	0	0	0	0	0	0	0	0	0	0	0	0	0	0	0	0	0	0	0	0	0	0	0	0	0	0	0	0	0	0	0	0	0	0	0	0	0
1.408	0	0	0	0	0	0	0	0	0	0	0	0	0	0	0	0	0	0	0	0	0	0	0	0	0	0	0	0	0	0	0	0	0	0	0	0	0	0	0	0	0	0	0	0	0	0	0	0	0
[truncated: 146 more columns]

## Sheet: mCh-sNL1 (alone)
Experiment 1
	Line scan 1			2			3			4			5			6			AVERAGE			STANDARD DEVIATION
Distance from peak ACA intensity (μm)	mCherry	HEC1		mCherry	HEC1		mCherry	HEC1		mCherry	HEC1		mCherry	HEC1		mCherry	HEC1		mCherry	HEC1		mCherry	HEC1
-1.472	0.914669	0.631078
-1.408	0.952061	0.671679		0.959341	0.687156														0.955701	0.679418		0.00514724	0.0109437
-1.344	0.94535	0.654135		0.930769	0.679817														0.93806	0.666976		0.0103101	0.0181593
-1.28	0.951103	0.670175		0.948352	0.668807		0.889655	0.615797											0.929703	0.651593		0.0347098	0.0310079
-1.216	0.938639	0.657644		0.959341	0.642661		0.909195	0.623598		0.916107	0.700377								0.93082	0.65607		0.0227936	0.0326587
-1.152	0.921381	0.630075		0.985714	0.645413		0.916092	0.648464		0.916107	0.700377								0.934824	0.656082		0.0340184	0.0306062
-1.088	0.916587	0.631078		0.931868	0.657339		0.964368	0.638713		0.938479	0.694459								0.937825	0.655397		0.019929	0.0282809
-1.024	0.962608	0.669674		0.969231	0.659633		0.924138	0.629449		0.947427	0.680473								0.950851	0.659807		0.0200112	0.0219552
-0.96	0.951103	0.643609		0.928571	0.651835		0.949425	0.631887		0.947427	0.698225								0.944132	0.656389		0.0104817	0.0290669
-0.896	1	0.665163		0.928571	0.651835		0.902299	0.61531		0.961969	0.741259					0.862725	0.708995		0.931113	0.676512		0.0529412	0.0493223
-0.832	1	0.665163		0.979121	0.671101		0.905747	0.611409		0.967562	0.696611		0.985915	0.761963		0.93487	0.72428		0.962202	0.688421		0.0353276	0.0520253
-0.768	0.962608	0.666165		0.956044	0.637615		0.910345	0.609946		0.950783	0.697687		0.997988	0.795092		0.918838	0.737213		0.949434	0.69062		0.031751	0.0678986
-0.704	0.962608	0.673684		0.965934	0.703211		0.898851	0.629449		0.946309	0.675632		0.977867	0.770552		0.946894	0.73545		0.949744	0.697996		0.0276716	0.0499685
-0.64	0.96069	0.67218		0.961538	0.662844		0.956322	0.601658		0.918345	0.677784		0.920523	0.835583		0.940882	0.750735		0.94305	0.700131		0.0197569	0.0815793
-0.576	0.928092	0.702256		0.964835	0.677064		0.972414	0.60312		0.956376	0.696611		0.926559	0.806748		0.945892	0.769547		0.949028	0.709225		0.0189934	0.0716237
-0.512	0.931927	0.679699		0.945055	0.648165		0.927586	0.616772		0.922819	0.706832		0.939638	0.769939		0.945892	0.75779		0.935486	0.696533		0.00951434	0.0603844
-0.448	0.953979	0.734336		0.945055	0.648165		0.927586	0.616772		0.964206	0.726735		0.949698	0.757669		0.950902	0.760141		0.948571	0.707303		0.0121088	0.0602163
-0.384	0.943432	0.711278		0.951648	0.683945		0.956322	0.625061		0.923937	0.731576		0.942656	0.850307		0.97495	0.800118		0.948824	0.733714		0.0169305	0.080986
-0.32	0.946309	0.786967		0.957143	0.68211		0.935632	0.668454		0.975391	0.764927		0.945674	0.802454		0.943888	0.778954		0.950673	0.747311		0.0139224	0.0572617
-0.256	0.943432	0.783459		0.98022	0.744495		0.963218	0.717699		0.975391	0.764927		0.961771	0.831902		0.937876	0.800705		0.960318	0.773865		0.0168677	0.0406887
-0.192	0.943432	0.783459		0.951648	0.860092		0.951724	0.795709		0.99217	0.779451		0.970825	0.909816		0.921844	0.832451		0.955274	0.82683		0.0240279	0.0512229
-0.128	0.952061	0.879699		0.961538	0.96789		0.989655	0.881521		0.979866	0.906401		0.970825	0.909816		1	0.926514		0.975658	0.911974		0.0178083	0.0326887
-0.064	0.931927	0.942356		0.998901	0.986239		0.98046	0.931741		0.982103	0.963421		1	0.905521		0.937876	0.94415		0.971878	0.945571		0.0298379	0.0274957
0	0.96836	1		1	1		0.962069	1		0.98434	1		0.904427	1		0.965932	1		0.964188	1		0.0325115	0
0.064	0.926174	0.945865		1	1		0.962069	1		0.973154	0.987628		0.962777	0.994479		0.965932	1		0.965018	0.987995		0.0237205	0.0212108
0.128	0.935762	0.972932		0.943956	0.902752		0.934483	0.844954		1	0.91447		0.944668	0.996319		0.937876	0.934744		0.949457	0.927695		0.0251145	0.053756
0.192	0.963567	0.831579		0.972527	0.814679		0.96092	0.816187		0.994407	0.899946		0.929577	0.874233		0.952906	0.952381		0.962317	0.864834		0.0214383	0.0547241
0.256	0.8907	0.807018		0.978022	0.71789		0.967816	0.656265		0.977629	0.798817		0.953722	0.847239		0.898798	0.78542		0.944448	0.768775		0.0395805	0.069349
0.32	0.93001	0.796491		0.983516	0.754587		0.932184	0.674305		0.96085	0.755783		0.930584	0.771166		0.961924	0.78542		0.949845	0.756292		0.0222582	0.0433835
0.384	0.894535	0.786466		0.961538	0.713303		0.963218	0.654315		0.959732	0.755245		0.960765	0.790798		0.92986	0.798354		0.944941	0.749747		0.0277377	0.0563236
0.448				0.951648	0.740826		0.993103	0.642613		0.972036	0.741797		0.933602	0.780982		0.935872	0.746032		0.957252	0.73045		0.0252574	0.0518361
0.512							0.935632	0.648464		0.977629	0.760086		0.916499	0.770552					0.943253	0.726367		0.0312693	0.0676689
0.576							1	0.633837		0.950783	0.779989								#REF!	#REF!		#REF!	#REF!
0.64							0.990805	0.630424
0.704							0.962069	0.629449
0.768							0.948276	0.654803
0.832
Experiment 2
	Line scan 1		2		3		4		5		6		7		8		9		10		11		12		13		14		15		16		17		18		19		20		21		22		23		24		25
Distance from peak ACA intensity (μm)	mCherry	HEC1	mCherry	HEC1	mCherry	HEC1	mCherry	HEC1	mCherry	HEC1	mCherry	HEC1	mCherry	HEC1	mCherry	HEC1	mCherry	HEC1	mCherry	HEC1	mCherry	HEC1	mCherry	HEC1	mCherry	HEC1	mCherry	HEC1	mCherry	HEC1	mCherry	HEC1	mCherry	HEC1	mCherry	HEC1	mCherry	HEC1	mCherry	HEC1	mCherry	HEC1	mCherry	HEC1	mCherry	HEC1	mCherry	HEC1	mCherry
-1.792	0	0	0	0	0	0	0	0	0	0	0	0	0	0	0	0	0	0	0	0	0	0	0	0	0	0	0	0	0	0	0	0	0	0	0	0	0	0	0	0	0	0	0	0	0	0	0	0	0
-1.728	0	0	0	0	0	0	0	0	0	0	0	0	0	0	0	0	0	0	0	0	0	0	0	0	0	0	0	0	0	0	0	0	0	0	0	0	0	0	0	0	0	0	0	0	0	0	0	0	0
-1.664	0	0	0	0	0	0	0	0	0	0	0	0	0	0	0	0	0	0	0	0	0	0	0	0	0	0	0	0	0	0	0	0	0	0	0	0	0	0	0	0	0	0	0	0	0	0	0	0	0
-1.6	0	0	0	0	0	0	0	0	0	0	0	0	0	0	0	0	0	0	0	0	0	0	0	0	0	0	0	0	0	0	0	0	0	0	0	0	0	0	0	0	0	0	0	0	0	0	0	0	0
-1.536	0	0	0	0	0	0	0	0	0	0	0	0	0	0	0	0	0	0	0	0	0	0	0	0	0	0	0.9476	0.735	0	0	0	0	0	0	0	0	0	0	0	0	0	0	0	0	0	0	0	0	0
-1.472	0	0	0	0	0	0	0	0	0	0	0	0	0	0	0	0	0	0	0	0	0	0	0	0	0.975	0.7486	0.9245	0.6901	0	0	0	0	0	0	0	0	0	0	0	0	0	0	0	0	0	0	0	0	0
-1.408	0	0	0	0	0	0	0	0	0	0	0	0	0	0	0	0	0	0	0	0	0.928	0.776	0.9683	0.7197	0.9407	0.7803	0.9062	0.7144	0	0	0	0	0	0	0	0	0	0	0	0	0	0	0	0	0	0	0	0	0
-1.344	0	0	0	0	0	0	0	0	0	0	0	0	0	0	0	0	0	0	0	0	0.9053	0.7798	0.9462	0.7361	0.9592	0.7497	0.905	0.706	0	0	0	0	0.9455	0.7616	0	0	0	0	0	0	0	0	0	0	0	0	0	0	0
-1.28	0	0	0	0	0	0	0	0	0	0	0	0	0	0	0	0	0	0	0	0	0.928	0.8089	0.949	0.729	0.9684	0.7836	0.9074	0.7444	0.9612	0.6957	0	0	0.9465	0.7803	0	0	0	0	0	0	0	0	0	0	0	0	0	0	0
-1.216	0	0	0	0	0	0	0.9352	0.7964	0	0	0.8962	0.802	0	0	0	0	0	0	0	0	0.948	0.808	0.9352	0.7361	0.9657	0.7771	0.9026	0.7416	0.9399	0.7035	0	0	0.9465	0.7636	0	0	0	0	0	0	0	0	0	0	0	0	0	0	0
-1.152	0	0	0	0	0	0	0.9352	0.7964	0	0	0.873	0.8011	0	0	0	0	0	0	0.8754	0.8151	0.9173	0.7876	0.9352	0.7033	0.9513	0.7956	0.9927	0.7079	0.9311	0.6986	0	0	0.9271	0.8049	0	0	0	0	0	0	0	0	0	0	0	0	0	0	0
-1.088	0	0	0	0	0	0	0.91	0.7534	0	0	0.9204	0.7681	0.9395	0.7734	0	0	0	0	0.8754	0.8151	0.928	0.7895	0.9862	0.7505	0.9592	0.8164	0.944	0.7069	0.9787	0.7221	0	0	0.9058	0.7606	0.9469	0.7127	0	0	0	0	0	0	0.9612	0.749	0	0	0	0	0
-1.024	0.9419	0.7758	0	0	0	0	0.9217	0.7509	0	0	0.8927	0.7922	0.9178	0.785	0	0	0	0	0.8583	0.8088	0.928	0.7818	0.9283	0.7331	0.9684	0.7618	0.9269	0.6845	0.9624	0.7074	0	0	0.9317	0.7892	0.9469	0.7127	0	0	0	0	0	0	0.9286	0.7412	0	0	0	0	0
-0.96	0.9777	0.7247	0.9115	0.8166	0	0	0.9721	0.793	0	0	0.9231	0.7904	0.9377	0.7869	0	0	0	0	0.8557	0.7774	0.8933	0.774	0.9876	0.7238	0.9275	0.7858	0.9196	0.6985	0.9511	0.6947	0.9693	0.7756	0.9409	0.7823	0.9924	0.7238	0	0	0.924	0.7663	0.9289	0.8717	0.9348	0.752	0	0	0	0	0.9335
-0.896	0.9603	0.7421	0.9163	0.8062	0.9682	0.7214	0.9739	0.7689	0.893	0.8229	0.9106	0.7743	0.9639	0.7907	0.9097	0.7798	0	0	0.8961	0.8109	0.9147	0.7876	0.9766	0.7372	0.9354	0.7891	0.9379	0.7023	0.9098	0.7162	0.9301	0.7767	0.8994	0.8158	0.9562	0.7127	0.906	0.8762	0.924	0.7663	0.9289	0.8717	0.9424	0.7588	0	0	0	0	0.9335
-0.832	0.9273	0.7392	0.9615	0.8021	0.9841	0.7343	0.9496	0.7792	0.8921	0.8229	0.8837	0.802	0.907	0.8187	0.8946	0.7647	0.9161	0.7932	0.9098	0.7889	0.9187	0.7507	0.9531	0.7166	0.9341	0.7574	0.9172	0.6938	0.9336	0.7025	0.9718	0.7665	0.9649	0.7902	0.957	0.7563	0.906	0.8762	0.9326	0.8053	0.9374	0.837	0.9386	0.7441	0	0	0.9149	0.7769	0.9627
-0.768	0.9428	0.7863	0.9432	0.8249	0.9513	0.702	0.9919	0.7758	0.9021	0.8492	0.9222	0.7815	0.9232	0.811	0.9135	0.7458	0.9227	0.7891	0.8875	0.8056	0.9053	0.7614	0.9545	0.7485	0.9737	0.7891	0.9184	0.7069	0.9599	0.7417	0.9509	0.7432	0.9187	0.8325	0.9612	0.759	0.9126	0.8456	0.9326	0.8033	0.9374	0.8261	0.9662	0.7441	0	0	0.9329	0.7863	0.993
-0.704	0.9603	0.7469	0.923	0.8383	0.9305	0.7214	0.9613	0.7947	0.9311	0.83	0.9526	0.7948	0.9792	0.7695	0.9577	0.7703	0.9076	0.7737	0.9278	0.8224	0.9093	0.7905	0.9448	0.7536	0.9513	0.7978	0.9269	0.6835	0.9373	0.7133	1	0.7452	0.9317	0.8542	0.9435	0.7767	0.9107	0.8609	0.9111	0.778	0.9374	0.8261	0.9774	0.7441	0	0	0.9389	0.7807	1
-0.64	0.9205	0.7738	0.9317	0.7969	0.9742	0.7712	0.9721	0.8093	0.9483	0.829	0.9624	0.8073	0.9494	0.7715	0.9088	0.7382	0.8944	0.8189	0.8565	0.8328	0.9133	0.774	0.9766	0.7392	1	0.8131	0.944	0.691	1	0.7104	0.9362	0.7452	0.9557	0.8404	0.9435	0.7767	0.962	0.8467	0.9214	0.8033	0.891	0.863	0.9637	0.7666	0.9422	0.8137	0.9317	0.8051	0.9323
-0.576	0.9893	0.7305	0.9673	0.8529	1	0.7343	0.982	0.7964	0.8967	0.8401	0.8954	0.7841	0.9485	0.8149	0.9436	0.7505	0.9274	0.7768	0.8952	0.8318	0.92	0.773	0.9862	0.7844	0.9473	0.8284	0.9354	0.7313	0.9424	0.7104	0.9546	0.7472	0.9501	0.8305	0.9705	0.8239	0.943	0.8828	0.9499	0.8053	0.9384	0.8652	0.9925	0.7529	0.9495	0.8137	0.9604	0.776	0.9603
-0.512	0.9855	0.7632	0.9451	0.8477	0.9553	0.7316	0.9352	0.7964	0.922	0.835	0.9526	0.7618	0.9711	0.7763	0.9191	0.7486	0.9142	0.7891	0.8883	0.7827	0.912	0.775	0.9641	0.7495	0.9565	0.835	0.9221	0.7229	0.9524	0.6908	0.9816	0.7899	0.9215	0.8443	0.8963	0.7767	0.9601	0.8521	0.9542	0.8101	0.9441	0.9109	0.9524	0.793	0.9386	0.7915	0.9448	0.7948	0.965
-0.448	0.9952	0.796	0.8874	0.8912	0.9801	0.7509	0.9703	0.7964	0.9574	0.8462	0.9195	0.7886	0.9088	0.7946	0.92	0.7826	0.8954	0.7901	0.9192	0.8318	0.9293	0.7721	0.949	0.7741	0.9434	0.8	0.9574	0.7294	0.9574	0.6967	0.9914	0.7949	0.9566	0.803	0.9739	0.8072	0.9601	0.8521	0.9335	0.8053	1	0.8696	0.9637	0.7373	0.988	0.81	0.9329	0.7966	0.9323
-0.384	0.9341	0.7892	0.9451	0.8757	0.9732	0.7629	0.946	0.8359	0.913	0.8462	0.8909	0.769	0.972	0.7724	0.9473	0.7949	0.9585	0.8169	0.8978	0.8161	0.9347	0.7847	0.9766	0.7957	0.9618	0.87	0.9732	0.7715	0.9298	0.7025	0.9472	0.8264	0.9234	0.8729	0.9477	0.7933	1	0.8686	0.9318	0.8345	0.9223	0.8891	0.9787	0.7705	0.9615	0.786	0.9329	0.7966	0.965
-0.32	0.9767	0.8152	1	0.8518	0.999	0.7906	0.9019	0.8041	0.961	0.8887	0.9043	0.8296	0.9603	0.7772	0.9097	0.8441	0.9529	0.8385	0.8952	0.8077	0.948	0.7915	1	0.7772	0.9605	0.8689	0.9537	0.8258	0.9962	0.7525	0.9485	0.8071	0.9769	0.8581	1	0.7794	0.9696	0.8872	0.9231	0.8082	0.9232	0.8663	0.9436	0.7461	0.9687	0.8109	0.9664	0.8051	0.9382
-0.256	0.9855	0.8547	0.9528	0.8985	0.999	0.7906	0.9487	0.7758	0.9538	0.8715	0.9419	0.835	0.9449	0.8014	0.9238	0.8507	0.9491	0.8457	0.9356	0.8527	0.956	0.8206	0.9586	0.8193	0.9249	0.8525	0.9683	0.8155	0.9486	0.7436	0.973	0.8538	0.9381	0.8847	1	0.7794	0.943	0.9102	0.9637	0.8189	0.9678	0.8804	0.9887	0.7891	0.9699	0.8081	0.9496	0.8098	0.9242
-0.192	0.9709	0.9509	0.9269	0.8632	0.9911	0.833	0.9955	0.8308	0.9402	0.8897	0.924	0.8457	0.9377	0.8457	0.9925	0.9282	0.9303	0.8879	0.939	0.8485	1	0.9001	0.9572	0.8368	0.8946	0.8995	0.9415	0.9373	0.9386	0.8787	0.9546	0.8162	0.9732	0.934	0.9739	0.8406	0.9706	0.9244	0.905	0.853	0.9412	0.9033	0.9749	0.8135	0.9747	0.8948	0.9616	0.8772	0.9767
-0.128	0.9709	0.9557	0.9846	0.942	0.9513	0.9161	0.9721	0.872	0.9855	0.9615	0.9204	0.9402	0.9585	0.8746	0.9784	0.9027	0.9821	0.9321	0.9622	0.9331	0.9547	0.8972	0.9959	0.8819	0.9513	0.8863	0.9598	0.9916	0.9386	0.8787	0.9546	0.8721	0.9898	0.9241	0.946	0.8499	0.9734	0.9704	0.9326	0.8744	0.9687	0.9174	0.9348	0.9014	0.9723	0.9493	0.9245	0.8969	0.9522
-0.064	0.9748	0.9788	0.9365	0.9596	0.9533	0.9742	0.9541	0.9399	0.9438	0.9636	0.9231	0.9072	1	0.9836	1	0.9376	0.8926	0.9455	1	0.9833	0.9947	0.9544	0.9628	0.9538	0.9868	0.9312	0.9294	0.9597	0.9411	0.8914	0.9926	0.9259	0.9501	0.9842	0.8794	0.9166	0.9734	0.9704	0.9732	0.9289	0.9716	0.963	0.9336	0.9053	0.9194	0.928	0.9005	0.9719	0.9312
0	1	1	0.9297	1	0.9533	1	0.9973	1	0.9565	1	0.9669	1	0.9729	1	0.9445	1	0.9397	1	0.9261	1	0.9573	1	0.9903	1	0.9697	1	0.9671	1	0.9386	1	0.9313	1	0.9788	1	0.9621	1	0.9668	1	1	1	0.9915	1	0.9612	1	0.9699	1	0.9544	1	0.9697
0.064	0.9428	0.9519	0.949	0.9907	0.9593	0.9004	0.9334	0.9339	0.9266	0.9858	0.9276	0.9162	0.9585	0.9788	0.9718	0.9253	0.9274	0.9547	0.9493	0.9561	0.9693	0.936	0.9628	0.9846	0.9671	0.9618	0.9245	0.8745	0.9649	0.9247	0.9595	0.9949	0.9806	0.9931	0.9511	0.9648	0.9468	0.9507	0.9257	0.9922	0.9649	0.9924	0.9612	1	0.9603	0.9686	0.9544	1	0.9802
0.128	0.9787	0.8884	0.9297	0.9534	0.9543	0.8985	1	0.8651	1	0.9808	0.9097	0.8591	0.9377	0.947	0.952	0.8204	0.9698	0.8982	0.9545	0.9666	0.932	0.8962	0.9324	0.8901	0.9354	0.9956	1	0.78	0.9524	0.8777	0.9436	0.934	0.9557	0.935	0.9511	0.9648	0.9924	0.9452	0.962	0.9844	0.9848	0.9717	0.9875	0.9561	0.917	0.9391	0.9413	0.9335	0.9802
0.192	0.9448	0.8306	0.9692	0.9378	0.9811	0.8017	0.9226	0.7998	0.9918	0.9373	1	0.8733	0.9828	0.893	0.9652	0.81	1	0.894	0.9622	0.8976	0.9587	0.8361	0.9972	0.8532	0.9473	0.9301	0.9464	0.8015	0.9511	0.7926	0.9742	0.9178	1	0.8788	0.9604	0.9305	0.9506	0.931	0.9188	0.9484	0.945	0.9413	0.9624	0.8926	0.9519	0.9013	0.9532	0.8463	0.9428
0.256	0.9341	0.7921	0.9403	0.8767	0.9444	0.7472	0.9325	0.7775	0.9456	0.8836	0.8837	0.8323	0.9539	0.8255	0.9238	0.7628	0.9651	0.8303	0.9304	0.8391	0.9627	0.7953	0.9862	0.8255	0.9499	0.906	0.9842	0.7921	0.9386	0.7397	0.9583	0.8558	0.976	0.8985	0.9621	0.8267	0.9544	0.8949	0.9128	0.9435	0.9877	0.8924	1	0.8486	0.988	0.8662	0.9628	0.8454	0.9755
0.32	0	0	0.9682	0.8415	0.9732	0.7528	0	0	0.9465	0.8664	0.9186	0.8778	0.9485	0.8149	0.9962	0.7694	0.934	0.8498	0.9167	0.8307	0.984	0.7575	0.949	0.7803	0.9539	0.8459	0.8953	0.7294	0.9937	0.7515	0.9865	0.8538	0.964	0.8286	0.9772	0.798	0	0	0.9154	0.8656	1	0.8576	0.9875	0.8662	0.9591	0.7952	0.9556	0.836	0.9708
0.384	0	0	0	0	0	0	0	0	0.9819	0.8532	0.9553	0.8127	0.9241	0.8071	0	0	0	0	0.927	0.8568	0	0	0.9214	0.7813	0.971	0.8546	0	0	0.9962	0.7388	0.9558	0.9137	0	0	0.9756	0.7702	0	0	0	0	0	0	0.9549	0.7988	1	0.7971	0.952	0.8004	0.9242
0.448	0	0	0	0	0	0	0	0	0.9628	0.8239	0	0	0	0	0	0	0	0	0	0	0	0	0	0	0.9473	0.87	0	0	0	0	0.9583	0.8467	0	0	0	0	0	0	0	0	0	0	0	0	0.9952	0.8284	1	0.8482	0
0.512	0	0	0	0	0	0	0	0	0	0	0	0	0	0	0	0	0	0	0	0	0	0	0	0	0.9341	0.8557	0	0	0	0	0	0	0	0	0	0	0	0	0	0	0	0	0	0	0	0	0	0	0
0.576	0	0	0	0	0	0	0	0	0	0	0	0	0	0	0	0	0	0	0	0	0	0	0	0	0	0	0	0	0	0	0	0	0	0	0	0	0	0	0	0	0	0	0	0	0	0	0	0	0
0.64	0	0	0	0	0	0	0	0	0	0	0	0	0	0	0	0	0	0	0	0	0	0	0	0	0	0	0	0	0	0	0	0	0	0	0	0	0	0	0	0	0	0	0	0	0	0	0	0	0
0.704	0	0	0	0	0	0	0	0	0	0	0	0	0	0	0	0	0	0	0	0	0	0	0	0	0	0	0	0	0	0	0	0	0	0	0	0	0	0	0	0	0	0	0	0	0	0	0	0	0
0.768	0	0	0	0	0	0	0	0	0	0	0	0	0	0	0	0	0	0	0	0	0	0	0	0	0	0	0	0	0	0	0	0	0	0	0	0	0	0	0	0	0	0	0	0	0	0	0	0	0
0.832	0	0	0	0	0	0	0	0	0	0	0	0	0	0	0	0	0	0	0	0	0	0	0	0	0	0	0	0	0	0	0	0	0	0	0	0	0	0	0	0	0	0	0	0	0	0	0	0	0
0.896	0	0	0	0	0	0	0	0	0	0	0	0	0	0	0	0	0	0	0	0	0	0	0	0	0	0	0	0	0	0	0	0	0	0	0	0	0	0	0	0	0	0	0	0	0	0	0	0	0
0.96	0	0	0	0	0	0	0	0	0	0	0	0	0	0	0	0	0	0	0	0	0	0	0	0	0	0	0	0	0	0	0	0	0	0	0	0	0	0	0	0	0	0	0	0	0	0	0	0	0
1.024	0	0	0	0	0	0	0	0	0	0	0	0	0	0	0	0	0	0	0	0	0	0	0	0	0	0	0	0	0	0	0	0	0	0	0	0	0	0	0	0	0	0	0	0	0	0	0	0	0
1.088	0	0	0	0	0	0	0	0	0	0	0	0	0	0	0	0	0	0	0	0	0	0	0	0	0	0	0	0	0	0	0	0	0	0	0	0	0	0	0	0	0	0	0	0	0	0	0	0	0
1.152	0	0	0	0	0	0	0	0	0	0	0	0	0	0	0	0	0	0	0	0	0	0	0	0	0	0	0	0	0	0	0	0	0	0	0	0	0	0	0	0	0	0	0	0	0	0	0	0	0
1.216	0	0	0	0	0	0	0	0	0	0	0	0	0	0	0	0	0	0	0	0	0	0	0	0	0	0	0	0	0	0	0	0	0	0	0	0	0	0	0	0	0	0	0	0	0	0	0	0	0
1.28	0	0	0	0	0	0	0	0	0	0	0	0	0	0	0	0	0	0	0	0	0	0	0	0	0	0	0	0	0	0	0	0	0	0	0	0	0	0	0	0	0	0	0	0	0	0	0	0	0
1.344	0	0	0	0	0	0	0	0	0	0	0	0	0	0	0	0	0	0	0	0	0	0	0	0	0	0	0	0	0	0	0	0	0	0	0	0	0	0	0	0	0	0	0	0	0	0	0	0	0
1.408	0	0	0	0	0	0	0	0	0	0	0	0	0	0	0	0	0	0	0	0	0	0	0	0	0	0	0	0	0	0	0	0	0	0	0	0	0	0	0	0	0	0	0	0	0	0	0	0	0
1.472	0	0	0	0	0	0	0	0	0	0	0	0	0	0	0	0	0	0	0	0	0	0	0	0	0	0	0	0	0	0	0	0	0	0	0	0	0	0	0	0	0	0	0	0	0	0	0	0	0
1.536	0	0	0	0	0	0	0	0	0	0	0	0	0	0	0	0	0	0	0	0	0	0	0	0	0	0	0	0	0	0	0	0	0	0	0	0	0	0	0	0	0	0	0	0	0	0	0	0	0
1.6	0	0	0	0	0	0	0	0	0	0	0	0	0	0	0	0	0	0	0	0	0	0	0	0	0	0	0	0	0	0	0	0	0	0	0	0	0	0	0	0	0	0	0	0	0	0	0	0	0
[truncated: 31 more columns]

## Sheet: mCh-sNL1 & GFP-HURP
Experiment 1
	Line scan 1				2				3				4				5				6				7				8				9					AVERAGE				STANDARD DEVIATION
Distance from peak ACA intensity (μm)	GFP (HURP)	mCherry	HEC1		GFP (HURP)	mCherry	HEC1		GFP (HURP)	mCherry	HEC1		GFP (HURP)	mCherry	HEC1		GFP (HURP)	mCherry	HEC1		GFP (HURP)	mCherry	HEC1		GFP (HURP)	mCherry	HEC1		GFP (HURP)	mCherry	HEC1		GFP (HURP)	mCherry	HEC1			GFP (HURP)	mCherry	HEC1		GFP (HURP)	mCherry	HEC1
-1.92													0.990261	0.938005	0.762094
-1.856	0.890707	0.853933	0.512297										0.929739	0.88814	0.766852																							0.910223	0.871036	0.639574		0.0275998	0.0241884	0.179998
-1.792	0.905903	0.933449	0.52772										0.902609	0.950135	0.770024																							0.904256	0.941792	0.648872		0.00232941	0.0117989	0.171335
-1.728	0.938048	0.843561	0.533972										0.875826	0.942049	0.772403																							0.906937	0.892805	0.653188		0.0439975	0.0696412	0.168596
-1.664	0.910579	0.886776	0.560233										0.872	0.920485	0.759715																							0.891289	0.903631	0.659974		0.0272792	0.0238359	0.141054
-1.6	0.89889	0.885048	0.602334										0.851478	0.924528	0.756542																							0.875184	0.904788	0.679438		0.0335248	0.0279171	0.109042
-1.536	0.959088	0.912705	0.599										0.871652	0.948787	0.772403																							0.91537	0.930746	0.685701		0.0618266	0.0255137	0.122615
-1.472	0.944477	0.884183	0.593164										0.871652	0.948787	0.772403																							0.908065	0.916485	0.682783		0.0514949	0.0456818	0.126741
-1.408	0.957335	0.894555	0.602751										0.880348	0.925876	0.776368																							0.918841	0.910215	0.68956		0.0544381	0.0221474	0.122766
-1.344	0.933372	0.93777	0.57524										0.905043	0.923181	0.774782		0.84861	0.95478	0.680028																			0.895675	0.938577	0.676683		0.0431509	0.0158153	0.0998132
-1.28	1	0.929991	0.555648		1	0.921676	0.6402						0.94887	0.938005	0.757335		0.84861	0.95478	0.680028																			0.94937	0.936113	0.658303		0.0713669	0.0141181	0.0839546
-1.216	0.921683	0.904062	0.552313		0.958921	0.903461	0.604809		1	0.951673	0.554021		0.928348	0.925876	0.780333		0.9207	0.965116	0.673699														0.901928	0.909887	0.748623			0.938597	0.926679	0.6523		0.0353255	0.0262119	0.0980203
-1.152	0.958504	0.918755	0.546478		0.959534	0.918033	0.61343		0.964552	0.947026	0.555501		0.925565	0.948787	0.801745		0.97597	1	0.691983														0.893292	0.941176	0.752066			0.946236	0.94563	0.6602		0.0309103	0.0299055	0.10542
-1.088	0.997662	0.939499	0.540642		0.928265	0.956284	0.573956		0.98694	0.933086	0.553527		0.925565	0.948787	0.801745		0.953656	0.985788	0.684951										0.949183	0.950237	0.884249		0.893138	0.884856	0.730028			0.947773	0.942648	0.6813		0.036328	0.0305056	0.132738
-1.024	0.971946	0.918755	0.552313		0.883507	0.95082	0.592559		0.955224	0.974907	0.591021		0.88	0.942049	0.76368		0.977	0.952196	0.647679										0.949183	0.950237	0.884249		0.931226	0.949937	0.715565			0.935441	0.948414	0.678152		0.0396413	0.0165719	0.117525
-0.96	0.950906	0.94382	0.565652		0.906806	0.989982	0.559437		0.904851	0.960037	0.612728		0.876522	0.91779	0.780333		0.968761	0.953488	0.677918		1	0.917538	0.665989						0.976588	0.930095	0.845421		0.937857	0.927409	0.700413			0.940286	0.94252	0.675987		0.0418425	0.0247845	0.10004
-0.896	0.957919	0.944685	0.566069		0.872471	0.935337	0.598457		0.925373	0.927509	0.588555		0.935652	0.921833	0.804124		0.94988	0.918605	0.689873		0.975149	0.941928	0.647178		0.993245	0.898023	0.563048		0.942105	0.968009	0.807326		0.980879	0.922403	0.761708			0.948075	0.930926	0.669593		0.036005	0.0197054	0.100103
-0.832	0.938048	0.902334	0.567737		0.896996	0.95082	0.568512		0.850746	0.960967	0.608288		0.942609	0.946092	0.836638		0.915551	0.975452	0.680731		0.972988	0.960511	0.653279		0.928938	0.962539	0.555196		0.950635	0.941943	0.823443		0.999846	0.933667	0.725207			0.932928	0.948258	0.668781		0.0431264	0.0212961	0.107522
-0.768	0.959673	0.924806	0.551897		0.910484	1	0.586207		0.854478	1	0.584114		0.933913	0.913747	0.780333		0.890834	0.931525	0.68917		0.961912	0.96748	0.671073		0.948933	0.87513	0.579215		0.958802	0.93128	0.817582		1	0.901126	0.732094			0.935448	0.938344	0.665743		0.0438086	0.0428919	0.096568
-0.704	0.926943	0.952463	0.55273		0.858369	0.981785	0.612069		0.858209	0.945167	0.574741		0.945391	0.95283	0.822363		0.920014	0.901809	0.731364		0.961102	0.925668	0.728521		0.981897	0.944849	0.650808		1	0.913507	0.759707		0.975944	0.987484	0.68595			0.93643	0.945063	0.679806		0.0511497	0.0285178	0.0897161
-0.64	0.976037	0.926534	0.557732		0.862048	0.93898	0.583031		0.908582	0.927509	0.641835		0.996522	0.954178	0.803331		0.94885	0.945736	0.729255		0.958671	0.925668	0.674631		1	0.927159	0.655889		0.982759	0.912322	0.801465		0.948805	0.989987	0.702479			0.953586	0.938675	0.683294		0.0444811	0.02289	0.0860356
-0.576	0.976037	0.926534	0.557732		0.855303	0.90255	0.587568		0.860075	0.925651	0.625555		0.990261	0.943396	0.79778		0.946447	0.916021	0.732771		0.97839	0.962834	0.686324		0.974872	0.943809	0.676674		0.937568	0.952607	0.774359		0.930609	0.958698	0.676309			0.93884	0.9369	0.679452		0.0502491	0.0204152	0.0806843
-0.512	0.947399	0.938634	0.563568		0.875536	0.952641	0.583938		0.873756	0.953532	0.656142		1	0.955526	0.822363		0.929283	0.988372	0.768636		0.975689	0.948897	0.684291		0.928128	0.927159	0.713626		0.926316	0.971564	0.772161		0.925212	0.963705	0.712121			0.931258	0.955559	0.697427		0.0409971	0.0178508	0.0861816
-0.448	0.927528	0.923941	0.587745		0.825261	0.952641	0.58167		0.865672	0.935874	0.644795		0.930783	0.950135	0.858049		0.910402	0.886305	0.761603		0.990546	1	0.683782		0.905161	0.954214	0.751963		0.920145	0.934834	0.781685		0.896839	0.971214	0.767218			0.908037	0.945462	0.713168		0.0456037	0.031534	0.0942196
-0.384	0.93571	0.929127	0.611088		0.835071	0.947177	0.631125		0.833955	0.964684	0.688209		0.885217	0.979784	0.849326		0.910402	0.886305	0.761603		0.998649	0.938444	0.717336		0.864091	0.965661	0.778291		0.945191	0.966825	0.767033		0.86091	0.957447	0.747934			0.896577	0.948384	0.727994		0.0555266	0.0280563	0.0750412
-0.32	0.912332	0.902334	0.63318		0.83691	0.917122	0.642015		0.817164	0.927509	0.72373		0.866435	0.973046	0.902458		0.929969	0.912145	0.790436		0.942193	0.990708	0.720895		0.921643	0.935484	0.786605		0.885662	0.959716	0.81978		0.864456	0.948686	0.757576			0.886307	0.94075	0.752964		0.0433722	0.0296162	0.0850816
-0.256	0.931034	0.930856	0.668612		0.836297	0.960838	0.672414		0.822139	0.953532	0.803651		0.904348	0.96496	0.926249		1	0.925065	0.869902		0.941383	0.963995	0.723437		0.902189	0.9282	0.804619		0.888748	0.952607	0.852747		0.835466	0.982478	0.840909			0.895734	0.951392	0.795838		0.0580379	0.019549	0.089835
-0.192	0.900058	0.917891	0.758649		0.793378	0.887978	0.766788		0.794154	0.960037	0.867292		0.930435	0.966307	0.956384		1	0.925065	0.869902		0.953809	0.925668	0.786477		0.831397	0.98127	0.848499		0.867332	0.99763	0.879853		0.824518	0.933667	0.883609			0.877231	0.943946	0.846384		0.0734834	0.0347158	0.0644421
-0.128	0.911748	0.917891	0.838683		0.794605	0.954463	0.87931		0.745647	0.908922	0.953133		0.914087	0.985175	0.982554		0.980433	0.928941	0.93038		0.911129	0.953542	0.84545		0.834639	0.941727	0.872055		0.864973	1	0.937729		0.844564	0.974969	0.981405			0.866869	0.951737	0.913411		0.0712005	0.0308147	0.0558314
-0.064	0.894214	0.942092	0.882034		0.793378	0.946266	0.989564		0.793532	0.942379	0.950173		0.881043	0.942049	0.97383		0.903193	0.957364	0.962025		0.882496	0.953542	0.898831		0.839233	0.949011	0.959815		0.846279	0.976303	0.985348		0.826831	0.992491	0.995179			0.851133	0.955722	0.9552		0.0416138	0.0175649	0.0397793
0	0.904734	0.939499	1		0.763948	0.956284	1		0.80908	0.947955	1		0.877913	0.98248	1		0.891864	0.981912	1		0.876283	0.940767	1		0.853823	0.968783	1		0.815064	0.983412	1		0.815112	0.982478	1			0.845313	0.964841	1		0.0468407	0.0188885	0
0.064	0.904734	0.939499	1		0.776824	0.961749	0.971416		0.777985	0.959108	0.846571		0.84487	0.963612	0.893735		0.882595	0.975452	0.966245		0.890059	0.965157	0.961871		0.836531	0.950052	0.979677		0.827949	0.927725	0.917949		0.796453	0.958698	0.919421			0.837556	0.955672	0.939654		0.047921	0.0144756	0.0488701
0.128	0.889538	0.936906	0.894123		0.786021	0.928051	0.836207		0.777985	0.959108	0.846571		0.854957	1	0.850912		0.84861	0.976744	0.952883		0.884387	0.972125	0.966955		0.810862	0.965661	0.953349		0.790926	0.959716	0.888645		0.813416	1	0.868457			0.828522	0.966479	0.895345		0.0422198	0.0245881	0.0505258
0.192	0.908825	0.923941	0.817841		0.781116	0.910747	0.759074		0.718905	0.918216	0.740997		0.854957	1	0.850912		0.878133	0.923773	0.945851		0.874932	0.96748	0.860193		0.800865	0.949011	0.917321		0.792559	0.919431	0.805861		0.783192	0.948686	0.75			0.821498	0.940143	0.827561		0.0609249	0.0291251	0.072822
0.256	0.852718	1	0.689871		0.804414	0.95173	0.66833		0.743159	0.98513	0.729156		0.868522	0.983827	0.845361		0.882252	0.939276	0.892405		0.893571	0.946574	0.818505		0.762497	0.970864	0.835104		0.816697	0.990521	0.807326		0.774557	0.964956	0.764463			0.822043	0.97032	0.783391		0.055006	0.0211926	0.0754065
0.32	0.833431	0.91357	0.609421		0.773145	0.913479	0.613884		0.761194	0.946097	0.697089		0.869565	0.955526	0.862807		0.87264	0.94832	0.83474		0.865478	0.939605	0.773259		0.762226	0.927159	0.732102		0.823956	0.937204	0.819048		0.770085	0.966208	0.731405			0.814636	0.938574	0.741528		0.0483681	0.0179958	0.0910527
0.384	0.851549	0.974935	0.583576		0.763335	0.946266	0.636116		0.745025	0.94145	0.691169		0.865043	0.928571	0.803331		0.863371	0.944444	0.820675		0.885467	0.981417	0.770208		0.715482	0.914672	0.667436						0.762529	0.97622	0.754821			0.806475	0.950997	0.715917		0.0663184	0.0242413	0.084449
0.448	0.781999	0.967156	0.59108		0.808706	0.939891	0.618875		0.722637	0.945167	0.690676		0.867478	0.963612	0.841396		0.848953	0.927649	0.787623		0.867369	0.974448	0.764108		0.707647	0.950052	0.703002						0.739244	0.932416	0.749311			0.793004	0.950049	0.718259		0.0651395	0.0169524	0.0845879
0.512	0.822911	0.950735	0.560233		0.800736	0.912568	0.625681		0.738806	0.973048	0.670449		0.858087	0.956873	0.833466		0.867834	0.912145	0.802391		0.863317	0.997677	0.752923		0.693056	1	0.725635											0.806392	0.957578	0.710111		0.0675842	0.0360192	0.0974429
0.576	0.78609	0.965428	0.583993		0.774372	0.903461	0.606624		0.70398	0.993494	0.688209						0.868864	0.925065	0.774965		0.838736	0.981417	0.743264		0.68441	0.914672	0.753811											0.776075	0.947256	0.691811		0.0724424	0.0377024	0.0803745
0.64	0.79135	0.939499	0.573989		0.765175	0.909836	0.599365		0.708333	0.952602	0.689689						0.87264	0.959948	0.767229																			0.784375	0.940471	0.657568		0.0682894	0.0221056	0.088375
0.704					0.763335	0.948998	0.626588
0.768					0.784181	0.969035	0.627949
0.832
0.896
Experiment 2
	Line scan 1			2			3			4			5			6			7			8			9			10			11			12			13			14			15			16			17
Distance from peak ACA intensity (μm)	GFP (HURP)	mCherry	HEC1	GFP (HURP)	mCherry	HEC1	GFP (HURP)	mCherry	HEC1	GFP (HURP)	mCherry	HEC1	GFP (HURP)	mCherry	HEC1	GFP (HURP)	mCherry	HEC1	GFP (HURP)	mCherry	HEC1	GFP (HURP)	mCherry	HEC1	GFP (HURP)	mCherry	HEC1	GFP (HURP)	mCherry	HEC1	GFP (HURP)	mCherry	HEC1	GFP (HURP)	mCherry	HEC1	GFP (HURP)	mCherry	HEC1	GFP (HURP)	mCherry	HEC1	GFP (HURP)	mCherry	HEC1	GFP (HURP)	mCherry	HEC1	GFP (HURP)
-1.408	0	0	0	0	0	0	0	0	0	0	0	0	0	0	0	0	0	0	0	0	0	0	0	0	0	0	0	0	0	0	0	0	0	0	0	0	0	0	0	0	0	0	0	0	0	0	0	0	0
-1.344	0	0	0	0	0	0	0	0	0	0	0	0	0	0	0	0	0	0	0	0	0	0	0	0	0	0	0	0	0	0	0	0	0	0	0	0	0	0	0	0	0	0	0	0	0	0.924	0.9065	0.7076	0.9675
-1.28	0	0	0	0	0	0	0	0	0	0	0	0	0	0	0	0	0	0	0	0	0	0	0	0	0	0	0	0	0	0	0	0	0	0	0	0	0	0	0	0	0	0	0	0	0	0.924	0.9065	0.7076	0.9758
-1.216	0	0	0	0	0	0	0	0	0	0	0	0	0	0	0	0	0	0	0	0	0	0	0	0	0	0	0	0	0	0	0	0	0	0	0	0	0	0	0	0	0	0	0.8929	0.8639	0.8079	0.9577	0.9242	0.736	0.9862
-1.152	0	0	0	0	0	0	0	0	0	0	0	0	0	0	0	0	0	0	0	0	0	0.8944	0.9606	0.792	0	0	0	0	0	0	0	0	0	0	0	0	0	0	0	0	0	0	0.8631	0.8938	0.7364	0.9967	0.9077	0.7562	0.9536
-1.088	0	0	0	0	0	0	0	0	0	0.9101	0.9217	0.8785	0	0	0	0	0	0	0	0	0	0.9009	0.9365	0.8102	0	0	0	0	0	0	0	0	0	1	0.9169	0.7984	0	0	0	0	0	0	0.8488	1	0.758	0.8989	0.9077	0.7434	0.9758
-1.024	0	0	0	0	0	0	0	0	0	0.9686	0.9593	0.8795	0	0	0	0	0	0	0.9343	0.9622	0.7413	0.9253	0.9416	0.7608	0	0	0	0	0	0	0	0	0	0.9552	1	0.8462	0	0	0	0	0	0	0.9107	0.9635	0.7759	0.9544	0.9305	0.7571	0.9723
-0.96	0	0	0	0	0	0	0	0	0	0.9664	0.9654	0.8233	0	0	0	0.9268	0.9068	0.5895	1	0.9221	0.7396	0.933	1	0.7643	0.8185	0.9423	0.8075	0	0	0	0	0	0	0.938	0.9532	0.8176	0	0	0	0	0	0	0.9191	0.9358	0.7844	0.9491	0.8925	0.7296	0.9446
-0.896	0	0	0	0.8925	0.9142	0.7902	0.9688	0.9064	0.7996	0.9426	0.988	0.8335	0	0	0	0.9296	0.9284	0.6136	0.9106	0.8855	0.7404	0.952	0.9591	0.773	0.8397	0.9723	0.7835	0	0	0	1	1	0.896	0.9198	0.9524	0.8167	0	0	0	0	0	0	0.8905	0.9137	0.7787	0.9703	0.9368	0.7351	0.9702
-0.832	0	0	0	0.8925	0.9142	0.7902	0.9607	0.9361	0.8054	0.9285	1	0.8611	0.8474	0.9533	0.7338	0.9474	0.9625	0.5938	0.8933	0.9679	0.7707	0.9755	0.9248	0.7617	0.8201	0.9192	0.7516	0.9632	0.9948	0.7824	0.988	0.9354	0.8644	0.9057	0.9016	0.841	0.9156	0.9654	0.7231	0.984	0.9402	0.8152	0.9012	0.958	0.7759	0.9729	0.9444	0.7764	0.9183
-0.768	0.9688	0.9502	0.7935	0.8869	0.9648	0.7727	0.9573	0.9317	0.7909	0.9285	1	0.8611	0.8855	0.9312	0.709	1	0.9227	0.6108	0.8613	0.9152	0.7404	0.9847	0.9482	0.7912	0.8334	0.9646	0.8004	1	0.9818	0.7639	0.944	0.9555	0.8906	0.9057	0.9016	0.841	0.928	0.9565	0.7131	0.9176	0.9568	0.8446	0.9191	0.9193	0.8117	0.9954	0.9292	0.7461	0.955
-0.704	1	0.9782	0.8103	0.9512	0.9571	0.8205	0.9457	0.9643	0.7881	0.9393	0.9337	0.8539	0.9315	0.9533	0.7178	0.9343	0.9375	0.6193	0.9024	0.8958	0.7182	0.9987	0.9482	0.7972	0.8514	0.943	0.8154	0.9785	0.9775	0.7736	0.9425	0.9782	0.8291	0.8847	0.8927	0.8419	0.9876	0.9453	0.7505	0.9096	0.9856	0.8275	0.8905	0.9425	0.8117	1	0.8989	0.7644	0.9647
-0.64	0.9677	0.9844	0.8145	0.969	0.9234	0.7746	0.9238	0.945	0.7746	0.9794	0.9669	0.8182	0.8797	0.9337	0.7063	0.9512	0.9534	0.6144	0.8805	0.921	0.7093	0.9794	0.9533	0.7565	0.8549	0.9492	0.7871	0.9937	1	0.778	0.9047	0.9642	0.9195	0.8814	0.9307	0.8349	1	0.9531	0.7295	1	0.9402	0.7972	0.8964	0.9414	0.7768	0.9333	0.8862	0.7534	0.9509
-0.576	0.9203	0.9689	0.8641	0.99	0.9694	0.7805	0.8857	1	0.7784	0.9426	0.9458	0.8304	0.9256	0.9472	0.7338	0.9117	0.9818	0.5852	0.8422	0.9507	0.7182	1	0.9723	0.7582	0.8913	0.9577	0.795	0.9494	0.9879	0.7982	0.9047	0.9642	0.9195	0.8453	0.9266	0.8202	0.9899	0.9732	0.7423	0.9382	0.9513	0.8379	0.8702	0.9027	0.8202	0.9822	0.9608	0.7874	0.982
-0.512	0.8955	0.9689	0.8335	1	0.9908	0.7971	0.9758	0.9599	0.8025	0.9523	0.9578	0.8509	0.8953	0.9767	0.6877	0.9089	1	0.6357	0.8349	0.9714	0.7271	0.9782	0.9693	0.753	0.9361	0.9869	0.7808	0.9494	0.9879	0.7982	0.8767	0.9485	0.8508	0.8401	0.8694	0.8149	0.9854	0.9955	0.7523	0.9451	0.9302	0.8398	0.881	0.9425	0.8032	0.9663	0.9431	0.7635	0.9668
-0.448	0.9343	0.9829	0.8451	0.9523	0.9648	0.8322	0.9527	0.9822	0.816	0.9523	0.9578	0.8509	0.8826	0.9754	0.7205	0.9164	0.958	0.6413	0.8558	0.976	0.7102	0.9677	0.9832	0.7435	0.9578	0.9677	0.8199	0.8918	0.981	0.8203	0.8596	0.9625	0.8825	0.8282	0.8645	0.8202	0.9348	0.9208	0.7268	0.9085	0.9701	0.8246	0.8941	0.917	0.8352	0.9683	0.9431	0.7278	0.9682
-0.384	0.9073	0.9907	0.8082	0.9257	1	0.8107	0.9527	0.9822	0.816	1	0.9895	0.8856	0.8728	0.9668	0.6735	0.9296	0.9273	0.6016	0.8741	0.9473	0.7387	0.969	0.954	0.799	0.9594	0.9638	0.8154	0.8628	0.9412	0.7789	0.8438	0.959	0.8662	0.7972	0.8887	0.8401	0.9168	0.9922	0.786	0.9405	0.9679	0.854	0.9119	0.9038	0.7853	0.9485	0.9305	0.7883	0.9585
-0.32	0.9052	0.9517	0.8441	0.9457	0.9954	0.8254	0.9781	0.9495	0.8507	0.9957	0.9488	0.8631	0.9384	0.9509	0.7223	0.9756	0.9739	0.6193	0.8741	0.9072	0.7378	0.9616	0.9547	0.7582	0.9775	0.9261	0.7649	0.7865	0.9178	0.7991	0.8485	0.9634	0.8843	0.7909	0.9016	0.9044	0.8796	0.9844	0.7696	0.9188	0.959	0.8986	0.9024	0.9403	0.8202	0.9927	0.9305	0.8139	0.9668
-0.256	0.8815	1	0.8546	0.9257	0.951	0.8371	0.9573	0.9242	0.8661	0.9328	0.9262	0.8713	1	0.9865	0.748	0.9662	0.9409	0.6996	0.8349	0.9301	0.7609	0.9616	0.9547	0.7582	0.9806	0.9677	0.8225	0.767	0.9377	0.8	0.8252	0.9878	0.8788	0.7846	0.9057	0.954	0.8763	0.9732	0.8525	0.8822	0.9435	0.8635	0.9048	0.9226	0.8183	0.9921	0.933	0.7929	0.937
-0.192	0.9127	0.9689	0.8114	0.9401	0.9357	0.8556	0.9596	0.9302	0.8276	0.9621	0.9503	0.9111	0.9707	0.9484	0.7791	0.9099	0.9705	0.7536	0.8294	0.945	0.8524	0.9907	0.9584	0.8198	0.9806	0.9677	0.8225	0.7497	0.9178	0.8617	0.7927	0.9337	0.9349	0.7767	0.8718	0.9904	0.8515	1	0.867	0.8684	0.9646	0.9365	0.9976	0.9226	0.8927	0.9782	0.9507	0.857	0.9322
-0.128	0.8933	0.9502	0.9168	0.9002	0.9893	0.8585	0.955	0.9302	0.8439	0.9892	0.9865	0.8876	0.9804	0.9742	0.9104	0.9042	0.9693	0.8196	0.8385	0.9691	0.8978	0.9661	0.9562	0.8856	0.9478	0.9831	0.8598	0.7121	0.9351	0.9216	0.7947	0.8857	0.9774	0.7699	0.8661	0.9705	0.8493	0.9676	0.9599	0.8673	0.9524	0.9356	1	0.9027	0.919	0.9544	0.9355	0.9074	0.9329
-0.064	0.8707	0.9673	0.9399	0.9291	0.9755	0.9659	1	0.9123	0.8979	0.9545	0.9789	0.9367	0.956	1	0.9264	0.8535	0.9943	0.9148	0.8586	0.9851	0.9422	0.9492	0.9891	0.9333	0.9623	0.9538	0.8767	0.7209	0.9818	0.9886	0.8054	0.9747	0.9928	0.7703	0.8427	0.98	0.8605	0.9766	0.9809	0.857	0.9823	0.9517	0.9619	0.9679	0.9736	0.9689	1	0.9303	0.9315
0	0.8394	0.9704	1	0.9712	0.9939	1	0.9146	0.9539	1	0.9437	0.9578	1	0.9051	0.9644	1	0.9005	0.9648	1	0.8841	0.9851	1	0.9171	0.9686	1	0.928	1	1	0.7265	0.885	1	0.7947	0.9564	1	0.7575	0.8669	1	0.8347	0.9453	1	0.865	0.9601	1	0.9298	0.9392	1	0.9531	0.9621	1	0.9613
0.064	0.8621	0.9735	0.9968	0.9357	0.977	0.9902	0.9146	0.9539	1	0.948	0.9819	0.9561	0.9051	0.9644	1	0.9089	0.9716	0.9751	0.8823	0.9691	0.9902	0.9103	0.908	0.9281	0.9381	0.9361	0.9361	0.7193	0.949	0.9427	0.7789	0.9354	0.9421	0.7374	0.8419	0.9123	0.8808	0.933	0.99	0.8741	0.99	0.9318	0.8964	0.9524	0.9124	0.965	0.952	0.9835	0.9426
0.128	0.8405	0.9673	0.9831	0.9479	0.9663	0.8946	0.97	0.9227	0.9923	0.9903	0.9443	0.951	0.9384	0.9914	0.9397	0.9155	0.9682	0.9162	0.8695	1	0.9467	0.9071	0.8526	0.8978	0.9468	0.9192	0.9166	0.7404	0.949	0.9736	0.788	0.952	0.9638	0.756	0.875	0.8914	0.8639	0.9342	0.9463	0.833	0.9502	0.8919	0.9286	0.927	0.9237	0.9405	0.9709	0.8937	0.9474
0.192	0.8879	0.9517	0.981	0.9357	0.9832	0.8498	0.9642	0.9272	0.973	0.9382	0.991	0.9081	0.9296	0.9939	0.9432	0.9033	0.9318	0.8196	0.8631	0.9553	0.88	0.8937	0.8876	0.8709	0.9832	0.9246	0.9024	0.7373	0.923	0.9057	0.774	0.9485	0.8942	0	0	0	0.8931	0.9431	0.9217	0.8822	1	0.8673	0.8702	0.9569	0.8418	0.9524	0.9633	0.89	0.9225
0.256	0.8427	0.9252	0.9231	0.898	0.9832	0.799	0.9446	0.9213	0.92	0.9285	0.9518	0.8815	0.9501	0.9656	0.8545	0.9014	0.9136	0.7095	0.8531	0.9828	0.8436	0.8882	0.8978	0.7851	0.9822	0.9453	0.9264	0.7407	0.9317	0.8264	0.7731	0.9782	0.9177	0	0	0	0.82	0.9654	0.8652	0.8558	0.9679	0.8446	0.9143	0.9779	0.8013	0.9465	0.914	0.8589	1
0.32	0.8524	0.9517	0.8736	0.8947	0.9587	0.8117	0.9376	0.9168	0.895	0.9328	0.9774	0.8631	0.9364	0.9963	0.78	0.8761	0.958	0.6257	0.8659	0.9152	0.8098	0.8676	0.8504	0.7981	1	0.9677	0.8518	0.7338	0.9957	0.8132	0.7702	0.9546	0.9069	0	0	0	0.8571	0.9163	0.816	0	0	0	0.8941	0.917	0.8164	0.9253	0.914	0.835	0.9619
0.384	0.8276	0.9611	0.8419	0.9435	0.9357	0.8166	0.9042	0.9317	0.843	0.9382	0.9669	0.8774	0.953	0.9717	0.7516	0.9136	0.9216	0.6307	0.886	0.9393	0.7787	0.8607	0.9044	0.7452	0.9862	0.9415	0.8403	0.7071	0.968	0.8379	0	0	0	0	0	0	0.847	0.9866	0.806	0	0	0	0	0	0	0	0	0	0.9696
0.448	0.8535	0.9938	0.8693	0	0	0	0.9596	0.9658	0.8401	0.9382	0.9307	0.8182	0.9658	0.9447	0.7542	0.8695	0.9148	0.5959	0.8951	0.9278	0.7493	0.8662	0.8839	0.76	0.9887	0.9754	0.8075	0	0	0	0	0	0	0	0	0	0	0	0	0	0	0	0	0	0	0	0	0	0
0.512	0.8599	0.9424	0.8219	0	0	0	0	0	0	0	0	0	0	0	0	0.8507	0.9466	0.6122	0	0	0	0	0	0	0.9794	0.9069	0.8163	0	0	0	0	0	0	0	0	0	0	0	0	0	0	0	0	0	0	0	0	0	0
0.576	0	0	0	0	0	0	0	0	0	0	0	0	0	0	0	0	0	0	0	0	0	0	0	0	0	0	0	0	0	0	0	0	0	0	0	0	0	0	0	0	0	0	0	0	0	0	0	0	0
0.64	0	0	0	0	0	0	0	0	0	0	0	0	0	0	0	0	0	0	0	0	0	0	0	0	0	0	0	0	0	0	0	0	0	0	0	0	0	0	0	0	0	0	0	0	0	0	0	0	0
[truncated: 86 more columns]
