# Supplementary material for: KIF18A's neck linker permits navigation of microtubule-bound obstacles within the mitotic spindle
Source: Life Sci Alliance. 2019 Jan 17;2(1):e201800169. doi: 10.26508/lsa.201800169 (PMC6337737; doi:10.26508/lsa.201800169)
Supplement: Supplementary file 8 [file LSA-2018-00169_SdataF5.xlsx]

## Sheet: GFP-WT KIF18A
Cell 1
Distance (μm)	GFP raw fluorescent intensity	HURP raw fluorescent intensity
0	971	993
0.064	922	950
0.129	927	980
0.193	906	990
0.258	882	974
0.322	911	994
0.387	920	1081
0.451	942	1077
0.516	999	1113
0.58	1013	1124
0.645	1024	1092
0.709	1065	1042
0.774	991	1023
0.838	939	1044
0.903	896	949
0.967	954	956
1.032	904	974
1.096	924	951
1.161	879	978
1.225	867	980
1.29	896	952
Distance (μm)	GFP raw fluorescent intensity	HURP raw fluorescent intensity
0	927	1016
0.064	944	1049
0.129	891	1072
0.193	907	1152
0.258	933	1250
0.322	942	1262
0.387	1003	1214
0.451	974	1131
0.516	962	1119
0.58	1001	1085
0.645	955	1025
0.709	909	1056
Cell 2
Distance (μm)	GFP raw fluorescent intensity	HURP raw fluorescent intensity
0	982	780
0.064	944	815
0.129	977	841
0.193	1005	828
0.258	1008	851
0.322	1028	881
0.387	1083	909
0.451	1061	870
0.516	1118	839
0.58	1085	861
0.645	1081	804
0.709	1049	842
0.774	1112	802
0.838	1081	821
Cell 3
Distance (μm)	GFP raw fluorescent intensity	HURP raw fluorescent intensity
0	999	714
0.064	1011	719
0.129	1026	708
0.193	959	711
0.258	965	734
0.322	1006	702
0.387	1062	684
0.451	1091	720
0.516	1014	674
0.58	1008	699
0.645	961	692
0.709	969	682
Cell 4
Distance (μm)	GFP raw fluorescent intensity	HURP raw fluorescent intensity	(graphed in figure)
0	1184	787
0.064	1174	814
0.129	1193	802
0.193	1217	853
0.258	1236	888
0.322	1402	925
0.387	1470	916
0.451	1533	888
0.516	1525	896
0.58	1392	864
0.645	1426	816
0.709	1401	854
0.774	1317	844
Distance (μm)	GFP raw fluorescent intensity	HURP raw fluorescent intensity
0	1142	793
0.064	1170	725
0.129	1123	783
0.193	1200	829
0.258	1230	852
0.322	1260	897
0.387	1265	925
0.451	1394	952
0.516	1396	901
0.58	1445	884
0.645	1412	803
0.709	1469	855
0.774	1385	809
0.838	1342	834
0.903	1280	825
0.967	1317	830
Distance (μm)	GFP raw fluorescent intensity	HURP raw fluorescent intensity
0	1394	922
0.064	1370	907
0.129	1400	927
0.193	1451	962
0.258	1436	892
0.322	1478	920
0.387	1428	874
0.451	1428	874
0.516	1329	811
0.58	1266	868
0.645	1255	792
0.709	1158	808
0.774	1152	773
Distance (μm)	GFP raw fluorescent intensity	HURP raw fluorescent intensity
0	1147	788
0.064	1212	796
0.129	1189	787
0.193	1217	816
0.258	1319	844
0.322	1284	941
0.387	1509	967
0.451	1601	946
0.516	1601	946
0.58	1588	952
0.645	1514	897
0.709	1417	838
0.774	1429	863
0.838	1327	796
Distance (μm)	GFP raw fluorescent intensity	HURP raw fluorescent intensity
0	1453	952
0.064	1441	968
0.129	1412	993
0.193	1386	1073
0.258	1427	1010
0.322	1518	1094
0.387	1473	1074
0.451	1604	994
0.516	1513	964
0.58	1548	965
0.645	1518	907
0.709	1582	885
0.774	1578	864
0.838	1439	918
Cell 5
Distance (μm)	GFP raw fluorescent intensity	HURP raw fluorescent intensity
0	1386	953
0.064	1452	948
0.129	1419	978
0.193	1417	1032
0.258	1421	1053
0.322	1507	975
0.387	1489	996
0.451	1489	996
0.516	1457	915
0.58	1466	904
0.645	1448	863
0.709	1390	888
Distance (μm)	GFP raw fluorescent intensity	HURP raw fluorescent intensity
0	1166	782
0.064	1195	811
0.129	1146	836
0.193	1159	863
0.258	1186	867
0.322	1222	885
0.387	1255	873
0.451	1264	780
0.516	1202	766
0.58	1187	768
0.645	1080	728
0.709	1106	740
0.774	1011	719
0.838	1037	732
Distance (μm)	GFP raw fluorescent intensity	HURP raw fluorescent intensity
0	1353	960
0.064	1392	966
0.129	1429	952
0.193	1506	1036
0.258	1418	1028
0.322	1418	1028
0.387	1452	1039
0.451	1554	1064
0.516	1515	1066
0.58	1626	1038
0.645	1600	1009
0.709	1606	984
0.774	1409	976
0.838	1473	955
0.903	1380	993
Cell 6
Distance (μm)	GFP raw fluorescent intensity	HURP raw fluorescent intensity
0	1326	783
0.064	1319	786
0.129	1344	831
0.193	1366	857
0.258	1386	862
0.322	1410	839
0.387	1418	804
0.451	1376	808
0.516	1276	790
0.58	1237	710
0.645	1214	738
0.709	1292	722
0.774	1234	740
Distance (μm)	GFP raw fluorescent intensity	HURP raw fluorescent intensity
0	1676	870
0.064	1676	916
0.129	1748	881
0.193	1793	939
0.258	1850	983
0.322	1991	921
0.387	1989	925
0.451	2019	902
0.516	1842	873
0.58	1738	904
0.645	1666	846
0.709	1670	827
0.774	1799	824
0.838	1729	853
Distance (μm)	GFP raw fluorescent intensity	HURP raw fluorescent intensity
0	1329	753
0.064	1242	736
0.129	1332	810
0.193	1289	842
0.258	1274	788
0.322	1303	818
0.387	1372	775
0.451	1443	762
0.516	1379	736
0.58	1250	711
0.645	1201	685
0.709	1142	695
0.774	1148	687
0.838	1179	679
Distance (μm)	GFP raw fluorescent intensity	HURP raw fluorescent intensity
0	1416	746
0.064	1416	746
0.129	1465	757
0.193	1427	775
0.258	1450	829
0.322	1418	838
0.387	1590	790
0.451	1511	816
0.516	1516	754
0.58	1419	741
0.645	1329	726
0.709	1329	726
0.774	1301	679
0.838	1277	733
0.903	1239	705
0.967	1203	698
Distance (μm)	GFP raw fluorescent intensity	HURP raw fluorescent intensity
0	1435	759
0.064	1506	793
0.129	1472	802
0.193	1481	805
0.258	1432	822
0.322	1605	799
0.387	1629	807
0.451	1531	786
0.516	1464	732
0.58	1399	733
0.645	1340	730
0.709	1301	732
0.774	1376	748
Cell 7
Distance (μm)	GFP raw fluorescent intensity	HURP raw fluorescent intensity
0	2240	784
0.064	2179	850
0.129	2205	844
0.193	2239	923
0.258	2346	947
0.322	2397	975
0.387	2639	986
0.451	2812	940
0.516	2716	893
0.58	2550	794
0.645	2550	794
0.709	2248	766
0.774	2334	749
0.838	2182	757
Cell 8
Distance (μm)	GFP raw fluorescent intensity	HURP raw fluorescent intensity
0	2796	1307
0.064	3069	1422
0.129	3202	1546
0.193	3182	1713
0.258	3094	1903
0.322	3085	2022
0.387	3096	2022
0.451	3175	1966
0.516	3138	1823
0.58	3035	1767
0.645	2968	1611
0.709	2779	1546
0.774	2754	1478
0.838	2700	1510
0.903	2804	1538

## Sheet: GFP-sNL1 KIF18A
Cell 1
Distance (μm)	GFP raw fluorescent intensity	HURP raw fluorescent intensity	(graphed in figure)
0	1274	997
0.064	1237	1053
0.129	1363	1058
0.193	1420	1029
0.258	1477	983
0.322	1447	988
0.387	1452	951
0.451	1335	909
0.516	1319	888
Distance (μm)	GFP raw fluorescent intensity	HURP raw fluorescent intensity
0	1190	1096
0.064	1251	1076
0.129	1250	1135
0.193	1217	1148
0.258	1260	1154
0.322	1304	1180
0.387	1362	1109
0.451	1368	1113
0.516	1348	1034
0.58	1333	975
0.645	1352	990
0.709	1281	987
0.774	1271	940
0.838	1224	976
0.903	1198	930
0.967	1235	892
Distance (μm)	GFP raw fluorescent intensity	HURP raw fluorescent intensity
0	1164	1033
0.064	1193	1083
0.129	1225	1068
0.193	1258	1113
0.258	1240	1090
0.322	1227	1145
0.387	1359	1118
0.451	1436	1104
0.516	1541	1069
0.58	1431	1061
0.645	1417	975
0.709	1285	967
0.774	1202	961
0.838	1219	967
0.903	1199	884
0.967	1176	945
Distance (μm)	GFP raw fluorescent intensity	HURP raw fluorescent intensity
0	1195	824
0.064	1195	824
0.129	1215	840
0.193	1269	836
0.258	1277	904
0.322	1367	959
0.387	1395	953
0.451	1482	988
0.516	1545	945
0.58	1523	972
0.645	1591	972
0.709	1638	906
0.774	1380	841
0.838	1273	795
0.903	1182	753
0.967	1096	758
1.032	1015	735
Distance (μm)	GFP raw fluorescent intensity	HURP raw fluorescent intensity
0	967	768
0.064	987	756
0.129	974	784
0.193	966	771
0.258	991	872
0.322	1010	914
0.387	1003	938
0.451	1018	903
0.516	1060	873
0.58	1086	797
0.645	1014	751
0.709	1010	775
0.774	921	757
0.838	933	741
0.903	876	729
0.967	889	721
Cell 2
Distance (μm)	GFP raw fluorescent intensity	HURP raw fluorescent intensity
0	987	1091
0.064	1042	1047
0.129	921	1122
0.193	1036	1136
0.258	1013	1133
0.322	1050	1171
0.387	1113	1199
0.451	1178	1212
0.516	1183	1147
0.58	1199	1161
0.645	1124	1166
0.709	1037	1124
0.774	1127	1172
0.838	1056	1059
0.903	1065	1096
Distance (μm)	GFP raw fluorescent intensity	HURP raw fluorescent intensity
0	1027	1157
0.064	1043	1119
0.129	1060	1129
0.193	1074	1092
0.258	1036	1135
0.322	1052	1183
0.387	1120	1185
0.451	1144	1179
0.516	1178	1243
0.58	1226	1149
0.645	1177	1113
0.709	1254	1098
0.774	1156	997
0.838	1147	1010
0.903	1077	981
0.967	1104	1007
1.032	1043	977
Cell 3
Distance (μm)	GFP raw fluorescent intensity	HURP raw fluorescent intensity
0	1404	835
0.064	1540	828
0.129	1506	788
0.193	1588	810
0.258	1588	810
0.322	1616	878
0.387	1665	885
0.451	1770	933
0.516	1830	908
0.58	2033	903
0.645	2007	881
0.709	1875	855
0.774	1710	804
0.838	1659	746
0.903	1573	781
0.967	1550	780
1.032	1524	745
1.096	1506	733
Distance (μm)	GFP raw fluorescent intensity	HURP raw fluorescent intensity
0	1519	798
0.064	1534	805
0.129	1568	823
0.193	1590	847
0.258	1666	844
0.322	1630	846
0.387	1706	835
0.451	1970	878
0.516	2183	847
0.58	2183	825
0.645	2046	833
0.709	1737	809
0.774	1633	861
0.838	1571	806
0.903	1565	839
0.967	1524	826
1.032	1426	828
1.096	1395	840
Cell 4
Distance (μm)	GFP raw fluorescent intensity	HURP raw fluorescent intensity
0	884	851
0.064	852	865
0.129	844	855
0.193	849	906
0.258	836	865
0.322	868	878
0.387	846	936
0.451	887	910
0.516	887	910
0.58	903	843
0.645	905	877
0.709	928	833
0.774	887	867
0.838	835	835
0.903	881	823
Cell 5
Distance (μm)	GFP raw fluorescent intensity	HURP raw fluorescent intensity
0	922	801
0.064	919	825
0.129	964	908
0.193	937	933
0.258	936	1032
0.322	981	1112
0.387	980	1165
0.451	987	1183
0.516	1028	1118
0.58	1038	1047
0.645	1077	997
0.709	1047	970
0.774	947	898
0.838	919	901
0.903	883	888
0.967	873	887
1.032	877	878
1.096	854	873
Distance (μm)	GFP raw fluorescent intensity	HURP raw fluorescent intensity
0	838	876
0.064	882	900
0.129	877	925
0.193	871	965
0.258	894	1077
0.322	894	1077
0.387	957	1028
0.451	951	983
0.516	950	972
0.58	971	903
0.645	959	937
0.709	965	890
0.774	1033	857
0.838	991	859
0.903	991	859
0.967	944	806
1.032	922	801
1.096	924	841
Cell 6
Distance (μm)	GFP raw fluorescent intensity	HURP raw fluorescent intensity
0	1149	985
0.064	1140	1035
0.129	1119	1026
0.193	1088	1011
0.258	1095	1123
0.322	1172	1106
0.387	1226	1185
0.451	1221	1103
0.516	1286	1094
0.58	1344	1074
0.645	1301	1095
0.709	1225	1024
0.774	1217	1039
0.838	1186	986
0.903	1163	966
0.967	1140	975
1.032	1162	955
1.096	1115	930
1.161	1081	980
1.225	993	914
Distance (μm)	GFP raw fluorescent intensity	HURP raw fluorescent intensity
0	1053	974
0.064	1055	973
0.129	1077	1029
0.193	1072	1058
0.258	1115	1140
0.322	1108	1221
0.387	1134	1316
0.451	1228	1342
0.516	1199	1274
0.58	1260	1218
0.645	1257	1111
0.709	1229	1129
0.774	1126	1063
0.838	1125	1014
0.903	1125	989
0.967	1099	936
Cell 7
Distance (μm)	GFP raw fluorescent intensity	HURP raw fluorescent intensity
0	982	837
0.064	963	867
0.129	983	843
0.193	965	918
0.258	1001	876
0.322	1002	938
0.387	1027	980
0.451	1102	976
0.516	1191	1116
0.58	1338	1051
0.645	1358	1065
0.709	1391	1109
0.774	1356	1048
0.838	1211	1037
0.903	1195	1015
Distance (μm)	GFP raw fluorescent intensity	HURP raw fluorescent intensity
0	972	926
0.064	1017	924
0.129	1029	1007
0.193	1051	1047
0.258	1102	1137
0.322	1102	1137
0.387	1184	1278
0.451	1283	1225
0.516	1251	1201
0.58	1302	1108
0.645	1274	1093
0.709	1207	1029
0.774	1128	969
0.838	1128	969
0.903	1113	1004
0.967	1113	936
1.032	1040	930
Cell 8
Distance (μm)	GFP raw fluorescent intensity	HURP raw fluorescent intensity
0	896	845
0.064	888	837
0.129	912	857
0.193	934	852
0.258	963	861
0.322	1001	926
0.387	985	890
0.451	982	898
0.516	1024	847
0.58	1024	791
0.645	1063	758
0.709	1083	751
0.774	1053	752
0.838	1007	713
0.903	975	712
0.967	939	716
1.032	880	705
1.096	864	697
1.161	845	673
1.225	839	683
Cell 9
Distance (μm)	GFP raw fluorescent intensity	HURP raw fluorescent intensity
0	2479	932
0.064	2472	948
0.129	2479	930
0.193	2630	1035
0.258	2715	1037
0.322	2781	1088
0.387	3023	1070
0.451	3119	1155
0.516	3196	1122
0.58	3256	1017
0.645	3192	991
0.709	3118	1005
0.774	3090	1004
0.838	3146	953
0.903	3208	965
0.967	3343	968
Distance (μm)	GFP raw fluorescent intensity	HURP raw fluorescent intensity
0	3465	910
0.064	3678	891
0.129	3612	873
0.193	3442	951
0.258	3658	986
0.322	4088	1070
0.387	4484	1070
0.451	4513	1034
0.516	4513	1034
0.58	4138	1017
0.645	3937	1010
0.709	3889	1043
0.774	3933	1004
0.838	3986	977
0.903	3895	995
Distance (μm)	GFP raw fluorescent intensity	HURP raw fluorescent intensity
0	2645	884
0.064	2660	868
0.129	2769	888
0.193	2647	846
0.258	2512	903
0.322	2671	942
0.387	2750	943
0.451	2973	1028
0.516	3324	963
0.58	3242	958
0.645	3122	908
0.709	2971	911
0.774	2830	925
0.838	2516	901
0.903	2379	883
0.967	2309	863
Distance (μm)	GFP raw fluorescent intensity	HURP raw fluorescent intensity
0	2645	851
0.064	2701	853
0.129	2640	931
0.193	2737	897
0.258	2804	970
0.322	3081	1007
0.387	3166	995
0.451	3411	963
0.516	3516	932
0.58	3288	839
0.645	2936	829
0.709	2801	830
0.774	2574	821
0.838	2468	863
0.903	2386	838
0.967	2412	841
